# Supplementary material for: Genome-wide meta-analyses in 708,480 individuals shed light on the genetic conflict between productivity and fertility in dairy cattle
Source: Research Square preprint supplement (doi:10.21203/rs.3.rs-8631217/v1), 2026-02-13
Supplement: Supplementary file 1 [file e69ac6b06901d514563bb492.docx]

**Supplementary Information**

**Supplementary Results**

**Gene Ontology Analysis of Meta-GWAS MAGMA genes**

In the set of genes prioritized by MAGMA from the Meta-GWAS results, notable high gene ratios were mammary gland development (MY; GO_BP:0030879), regulation of hormone levels (MY; GO_BP:0010817), lactation (MY; GO_BP:0007595), prolactin and PI3K-AKT signalling pathway (MY; KEGG:04917; KEGG:04151), response to growth hormone and growth hormone receptor GHR signalling (MY, PC; GO_BP:0060416; WP:WP2891), EPH-Ephrin signalling, which is involved in mammary gland branching morphogenesis1,2 (PY, PC; REAC:R-BTA-2682334), EPO receptor signalling (MY, PC; WP:WP996), and erythrocyte (MY; GO_BP:0030218) and myeloid cell differentiation (MY, PC; GO_BP:0030099), positive regulation of cytokine production (MY, PC; GO_BP:0001819), somatodendritic compartment (PC; GO_CC:0036477), neuron apoptotic process (PC; GO_BP:0051402), and neurotransmitter receptor regulator activity (MY, PY, FY, FC; GO_MF:0099602) (Supp Table 8 and Supp Figs. 3-11).

**Production QTL on chromosome 5 - LALBA**

Overlapping QTL regions for MY, FC, and PC were detected between 30Mb and 32Mb on chromosome 5 near *LALBA,* which encodes alpha lactalbumin, the second most abundant whey protein in bovine milk3 (Supp Fig. 16 Supp Table 17). This protein plays a key role in lactose synthesis and calcium ion binding4. Interestingly, *LALBA*-deficient mice were fertile but produced much less milk that was higher in fat and protein and lacked alpha-lactalbumin as well as lactose5. The most significant QTL region for MY, spanned 30,899,727 to 31,204,916 bp. Top variants (p = 1.1 × 10-29) were intergenic between *RF00001* and *LALBA,* but several variants near the QTL peak were within *LALBA*, including a stop-gained variant at 31,184,185 bp (p = 1.8 × 10-28) and a 3’UTR variant at 31,185,948 bp (p = 3.4 × 10-28). The stop-gained variant is a strong putative causal variant as it occurs within the first exon (<100bp). The allele associated with increased MY was also associated with reduced FC and PC, segregating at low to moderate frequency in Holstein populations, and close to zero allele frequency in Jersey (Supp Fig. 16b). Several variants in the QTL region were associated with expression of *LALBA* in liver tissue in cattle GTEx. A large meta-GWAS study6 in dairy cattle also reported a QTL for PC and FC close to the *LALBA* (where the most significant variant was chr5:31,185,948 for FC and PC).

**QTL in different populations and overlap**

There was overlap of QTL regions across dairy breeds and breed groups (Supp Table 22, Supp Results). While allele effect direction was generally consistent across breed groups (Range 57.2 to 85.3%), few significant loci were shared between groups (Range 4.0 to 53.8%). A higher proportion of significant loci were shared if a QTL region was detected in a smaller breed group overlapped with a large breed group (e.g., Supp Table 22, Jersey and Holstein), indicating a substantial influence of sample size. More closely related breeds had more similar QTL effects: effects of QTL shared by pairs of breeds with low *Fst* more often had the same sign than did pairs of breeds with high *Fst* (%Dir, 0.58 *R2*) (Supp Table 23). However, we observed no relationship between *Fst* and percentage QTL shared (%Shared) or percentage of QTL significant (%Sign) across breed groups. Only 338 variants spread across 10 QTL regions were significant in all breed groups (Supp Table 22). Consistent trends were not observed across breeds of the LD spectrum between QTL detected with the Meta-GWAS including and excluding the Holstein breed (Supp Table 24).

**QTL regions detected in multiple breeds**

We found 338 variants that were significant in the same trait and in all five breed groups (HOL, JER, RDC, BROWN,DUAL, Supp Table 22). A missense variant located in the *GHR* gene at 31,888,449 bp on chromosome 207 was detected for all breed groups for MY, FP and PP. Six variants associated with both FP and/or PP in all breeds groups were located with a previously located CNV region on chromosome 3 (variants between 15,464,742 and 15,495,684 bp)8. There were five variants detected in QTL regions associated with PY in all breed groups, between 85,438,110 and 85,454,960 bp on chromosome 6 (a well known QTL region encompassing several casein genes that play a key role in milk production9, including variants located in the *CSN2* gene. While there were variants on chromosome 11 detected in QTL regions for all breed groups both for FP and PP, these variants did not overlap; variants associated with FP were located between 103,245,794 and 103,277,147 bp (encompassing *ENSBTAG00000014678* and *GLT6D1*), whereas variants associated with PP were located between 104,173,054 and 104,184,960 bp (encompassing the *ABO gene*, and all variants located within the same CNV10,11. The remaining variants detected for all breed groups were located on chromosomes 10 (between 46,384,772 and 46,544,085 bp; associated with PP) and 27 (between 36,466,414 and 36,537,488 bp). This chromosome 27 region is a major candidate gene region for milk fat indicating *GPAT4*12 (36523101-36539737 bp). Hence, most QTL regions were not detected in all breed groups. For example, on chromosome 2, a QTL region detected for FP in JER between 122,157,740 and 122,398,415 bp was not significant in any other breed, including Holstein. The most significant variant in this QTL region was a downstream variant of *ENSBTAG00000058569*, located at 122,389,990 bp. There were also various QTL regions that were shared among three of the five breed groups. For example, a QTL region detected for FP in DUAL, located between 93,515,265 and 93,525,079 bp on chromosome 5, was significant in all breeds except JER. The most significant variant for this QTL region in DUAL was within an intron of *MGST1* located at 93,516,066 bp13.

**QTL regions overlap with brain gene expression and protein-protein interaction**

Checking overlap between QTL regions and genes known to be associated with behaviour heat scores, resulted in 46 trait specific QTL region-gene combinations, involving 29 unique genes (Supp Table 18). Checking overlap between QTL regions and direct comparison of bovine gene expression levels on d0 (start oestrous cycle) and d12 (midcycle) revealed differential expression of a limited number (n=13) of (RefSeq) genes in the pituitary, of which none were overlapping with QTL regions. Checking overlap between QTL regions and prioritized candidate gene based on protein-protein interactions, gene expression, and text-mining, resulted in 28 trait specific QTL region-gene combinations. Of which 5 were found in 2 tissue types while the remainder was only found in 1 tissue. This involved 20 unique genes.

Taken these results together 48 unique genes relevant to fertility traits were located in or close to (-/+10k) the QTL region. Only *SPTBN4* was found in both the gene set association with heat scores and the candidate gene set.

**Ancestral alleles**

Each allele of the significant QTL variants was classified as either ancestral or derived73 to evaluate trends in allele frequency and effect direction for derived versus ancestral alleles. In production yield traits (MY, PY, FY) the median derived allele showed a positive (favourable) trait effect (ancestral effect negative), while for milk content traits (PP, FP) we observed the opposite trend (Supp Fig. 17). This was expected because in evolutionary terms concentrated but relatively low milk yield is an optimal survival scenario for both cow and calf, while the high milk yields in modern dairy cattle place considerable metabolic stress on cows14,15. Similarly, for all fertility traits the ancestral alleles were always the positive effect (Supp Fig. 18). We found that the ancestral allele frequency was consistently higher for both production and fertility QTL (Supp Figs. 19 and 20).

1. Vaught, D., Chen, J. & Brantley-Sieders, D. M. Regulation of mammary gland branching morphogenesis by EphA2 receptor tyrosine kinase. *Mol. Biol. Cell* **20**, 2572–2581 (2009).

2. Miao, H. & Wang, B. Eph/ephrin signaling in epithelial development and homeostasis. *Int. J. Biochem. Cell Biol.* **41**, 762–770 (2009).

3. Layman, D. K., Lönnerdal, B. & Fernstrom, J. D. Applications for α-lactalbumin in human nutrition. *Nutr. Rev.* **76**, 444–460 (2018).

4. Permyakov, E. A. & Berliner, L. J. α-Lactalbumin: structure and function. *FEBS Lett.* **473**, 269–274 (2000).

5. Stinnakre, M. G., Vilotte, J. L., Soulier, S. & Mercier, J. C. Creation and phenotypic analysis of alpha-lactalbumin-deficient mice. *Proc. Natl. Acad. Sci.* **91**, 6544–6548 (1994).

6. Van den Berg, I. *et al.* Meta-analysis for milk fat and protein percentage using imputed sequence variant genotypes in 94,321 cattle from eight cattle breeds. *Genet. Sel. Evol.* **51**, 37 (2020).

7. Blott, S. *et al.* Molecular dissection of a quantitative trait locus: a phenylalanine-to-tyrosine substitution in the transmembrane domain of the bovine growth hormone receptor is associated with a major effect on milk yield and composition. *Genetics* **163**, 253–266 (2003).

8. Karimi, K., Esmailizadeh, A., Wu, D. & Gondro, C. Mapping of genome-wide copy number variations in the Iranian indigenous cattle using a dense SNP data set. *Anim. Prod. Sci.* **58**, 1192–1200 (2018).

9. Boettcher, P. *et al.* Effects of casein haplotypes on milk production traits in Italian Holstein and Brown Swiss cattle. *J. Dairy Sci.* **87**, 4311–4317 (2004).

10. Hou, Y. *et al.* Genomic characteristics of cattle copy number variations. *BMC Genomics* **12**, 127 (2011).

11. Boussaha, M. *et al.* Genome-wide study of structural variants in bovine Holstein, Montbéliarde and Normande dairy breeds. *PloS One* **10**, e0135931 (2015).

12. Wang, X. *et al.* Identification and dissection of four major QTL affecting milk fat content in the German Holstein-Friesian population. *PloS One* **7**, e40711 (2012).

13. Littlejohn, M. D. *et al.* Sequence-based association analysis reveals an MGST1 eQTL with pleiotropic effects on bovine milk composition. *Sci. Rep.* **6**, 25376 (2016).

14. Cole, J. B., Makanjuola, B. O., Rochus, C. M., Van Staaveren, N. & Baes, C. The effects of breeding and selection on lactation in dairy cattle. *Anim. Front.* **13**, 62–70 (2023).

15. Gross, J. J. Dairy cow physiology and production limits. *Anim. Front. Rev. Mag. Anim. Agric.* **13**, 44 (2023).

**Supplementary Figures**


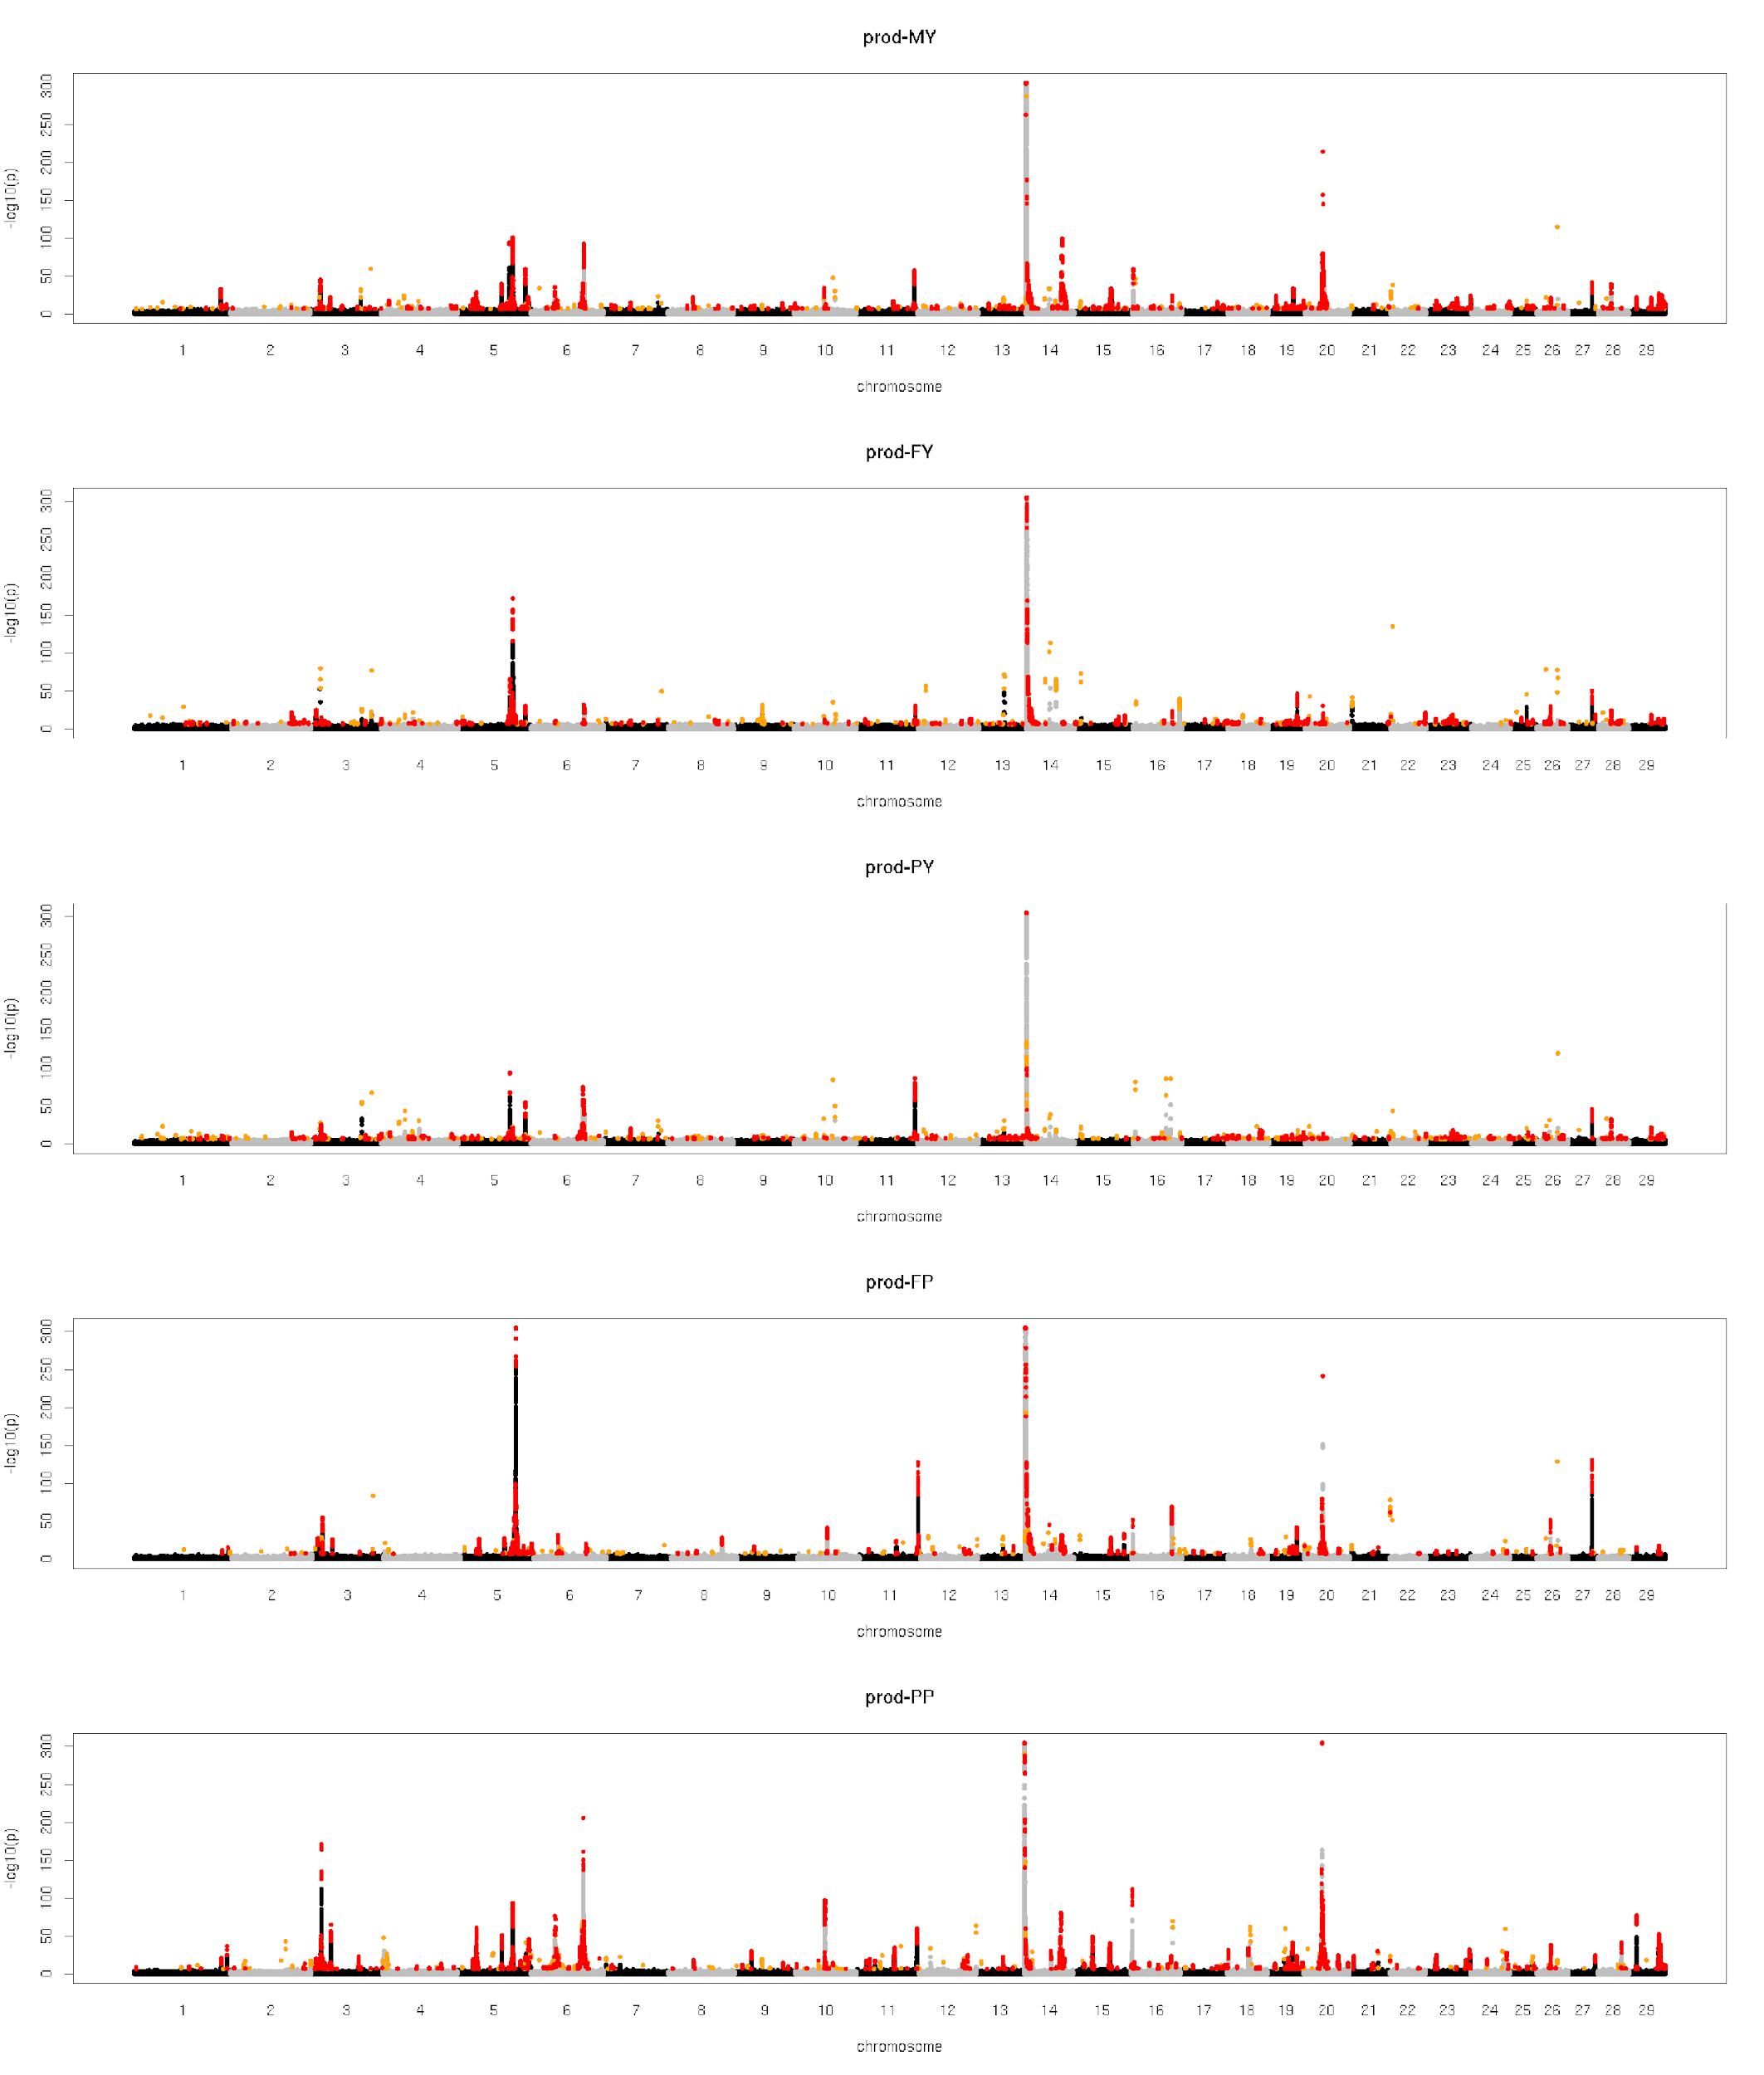


Supp Figure 1: Manhattan plot multi breed meta-GWAS for production traits. Orange = non-validated QTL regions, red = validated QTL regions.


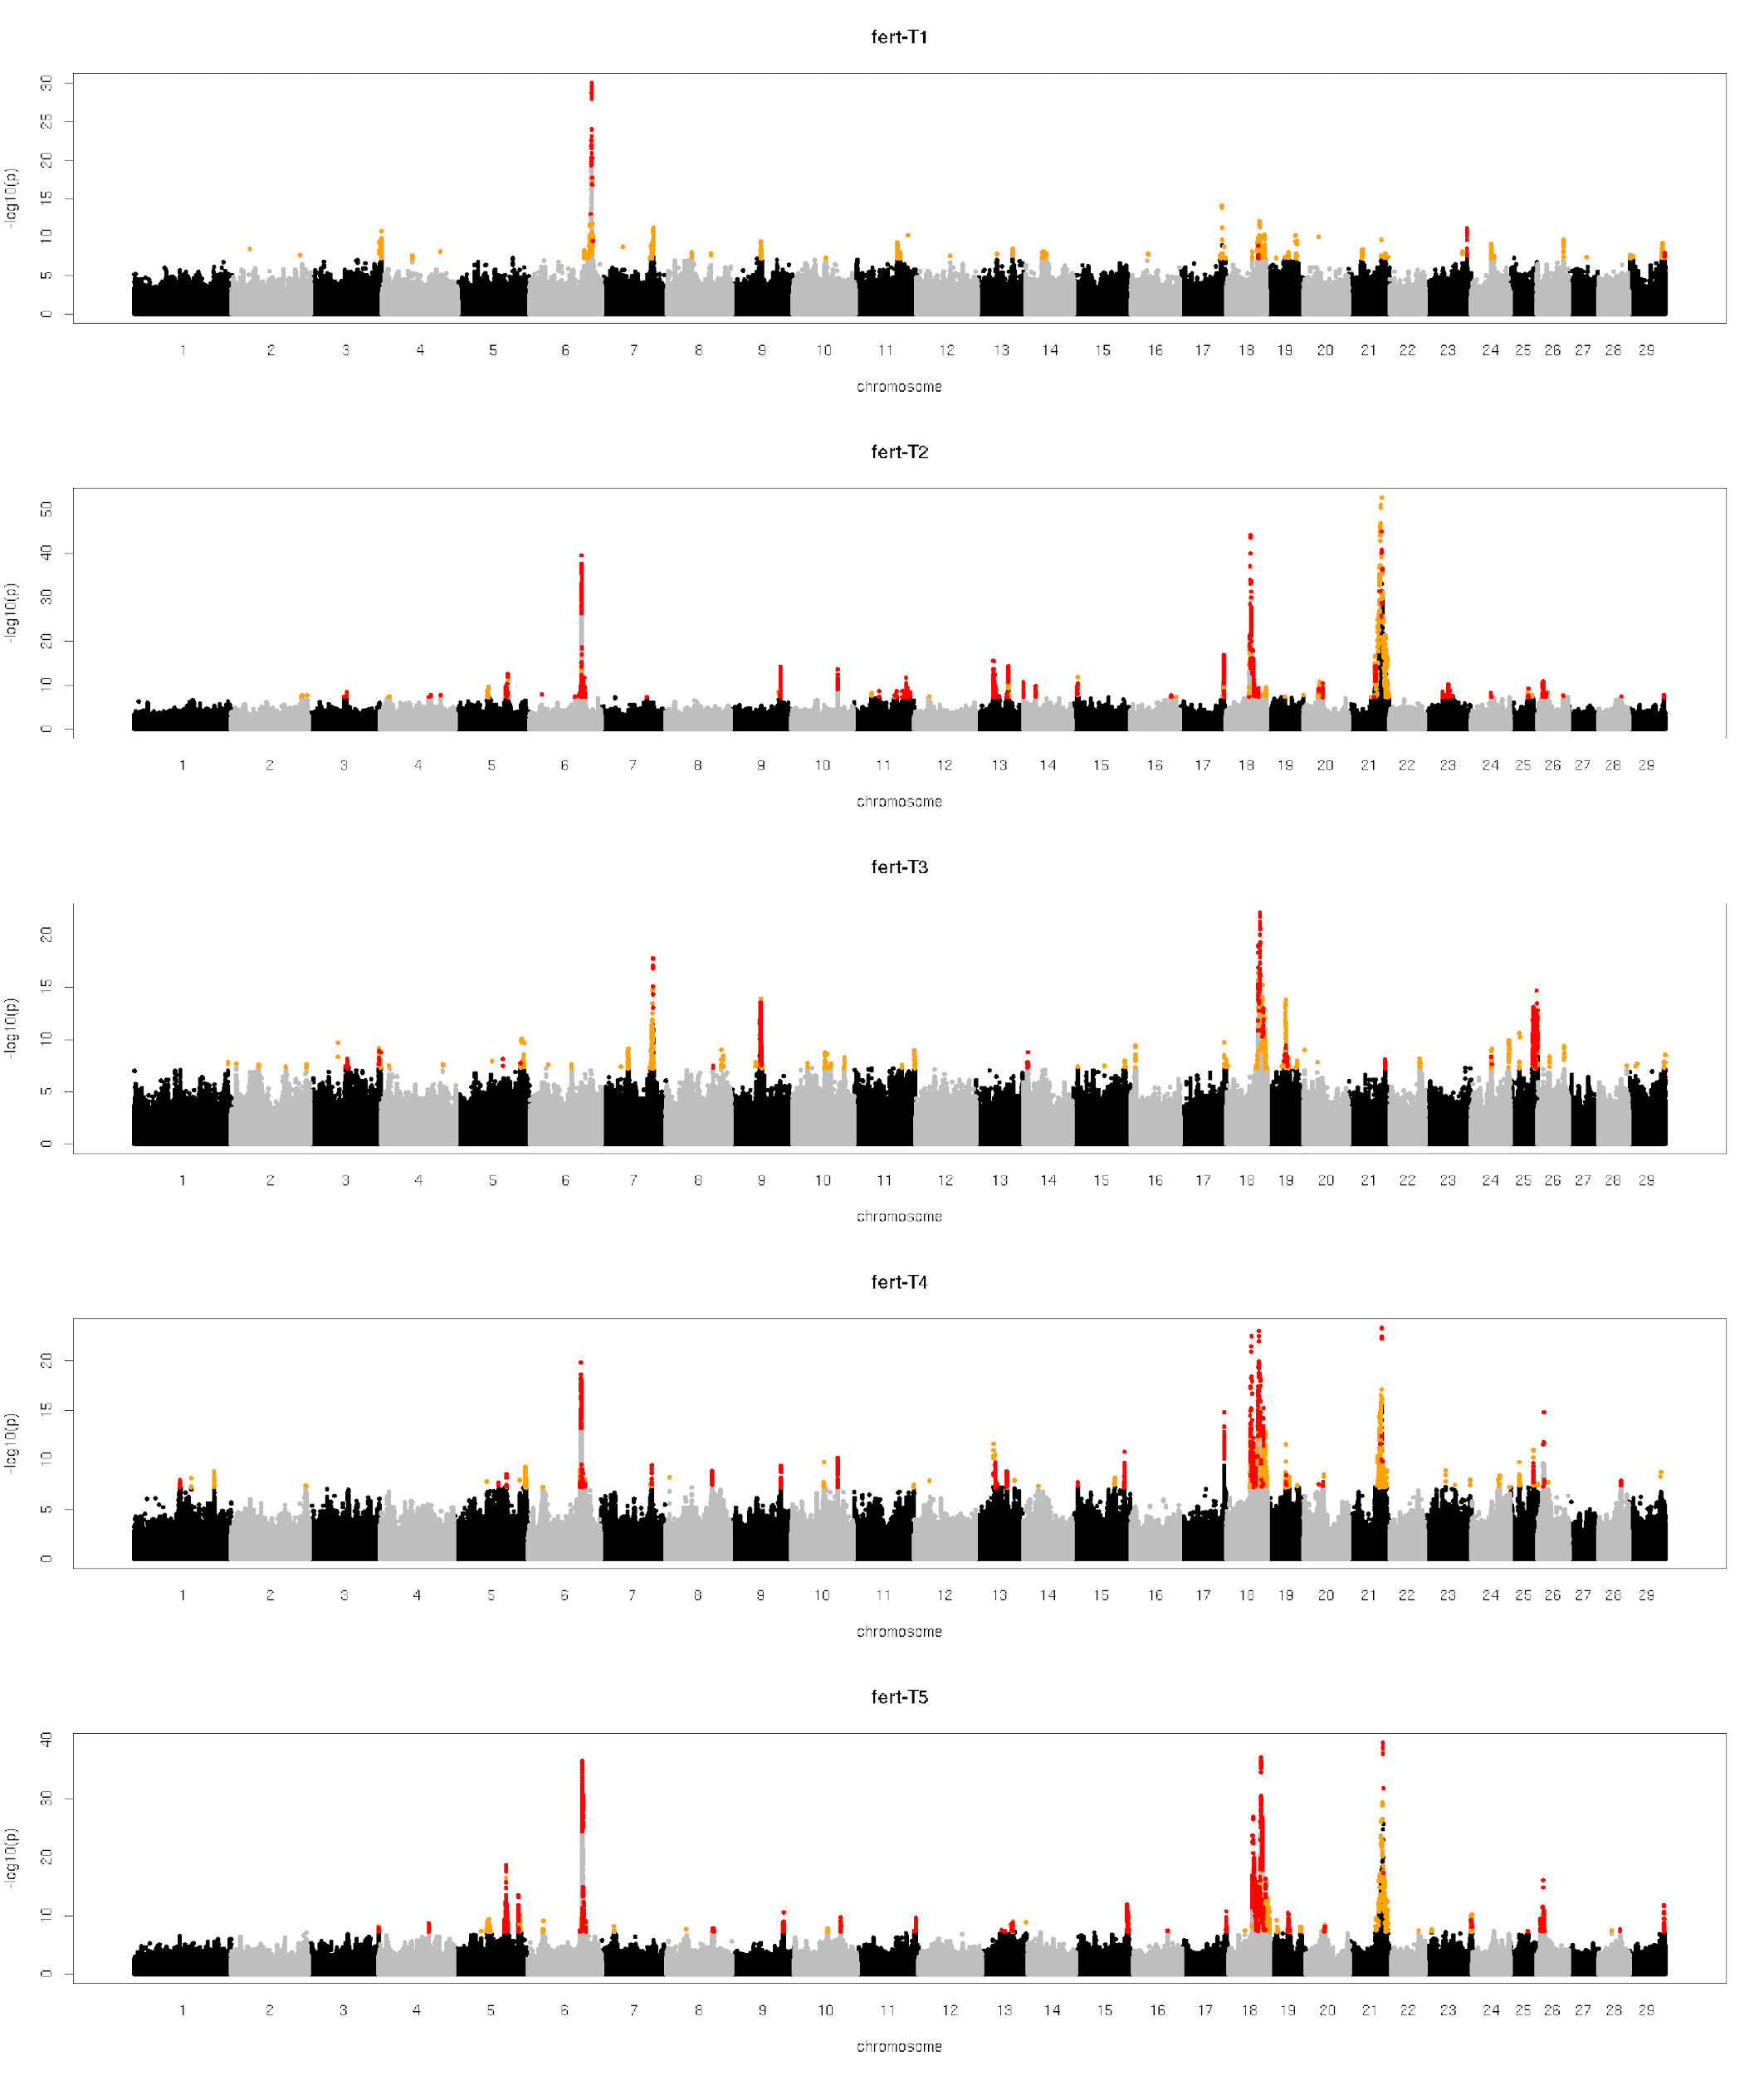


Supp Figure 2. Manhattan plot multi-breed meta-GWAS for fertility traits. Orange = non-validated QTL regions, red = validated QTL regions.

**Supp Figure 3. Gene Ontology overrepresentation analysis for Milk Yield (MY)**


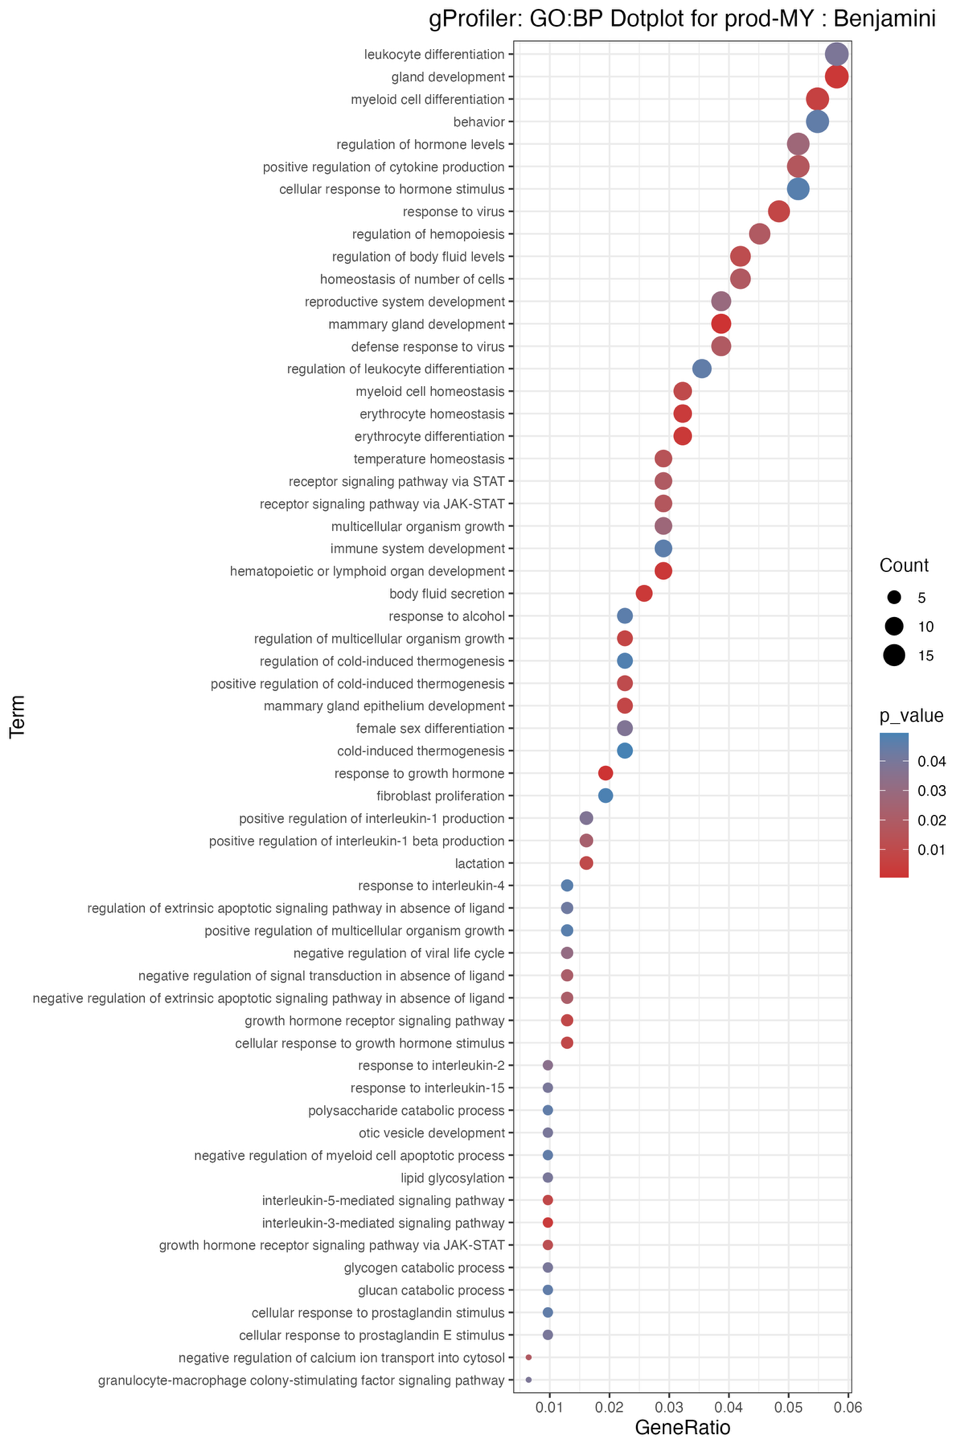


**Supp Figure 3.1.** Gene ratio plot for GO: Biological Process associated with MY.

**
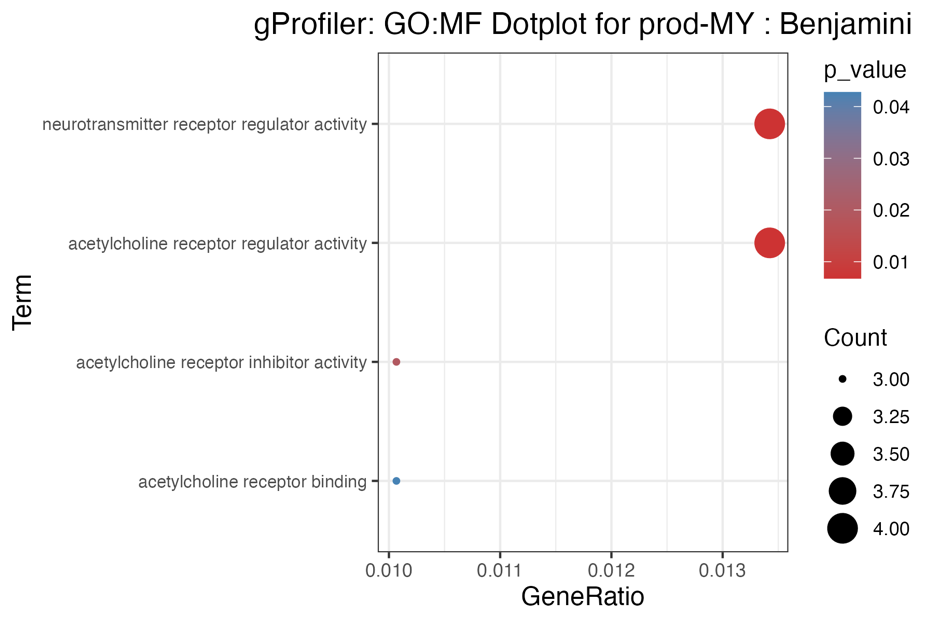
**

**Supp Figure 3.2.** Gene ratio plot for GO: Molecular Functions associated with MY.


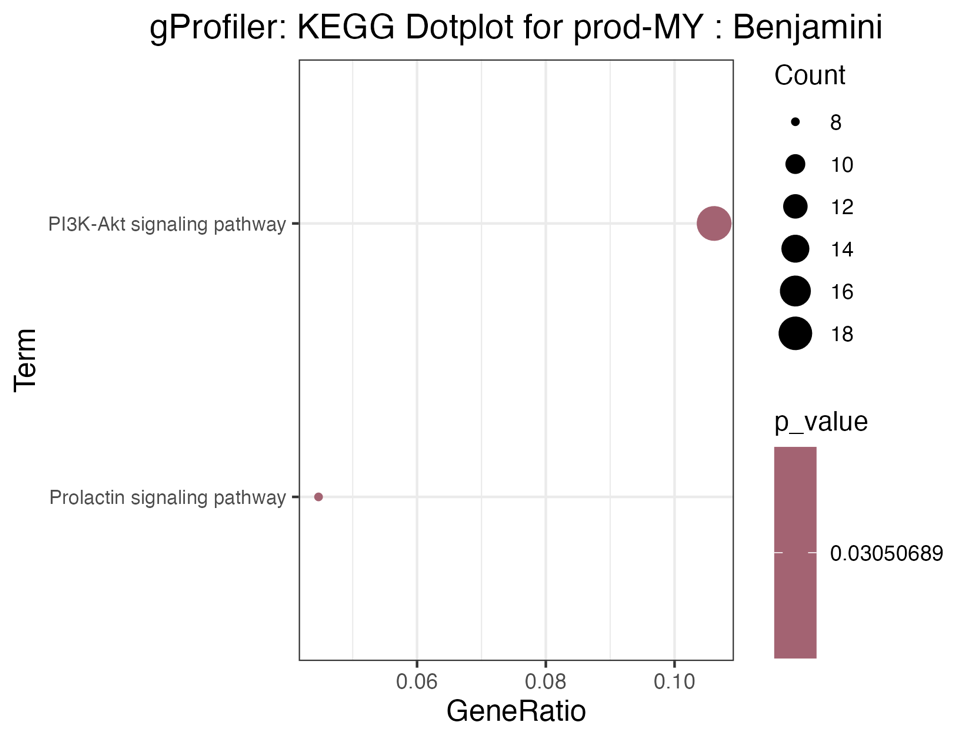


**Supp Figure 3.3**. Gene ratio plot for KEGG Pathways associated with MY.


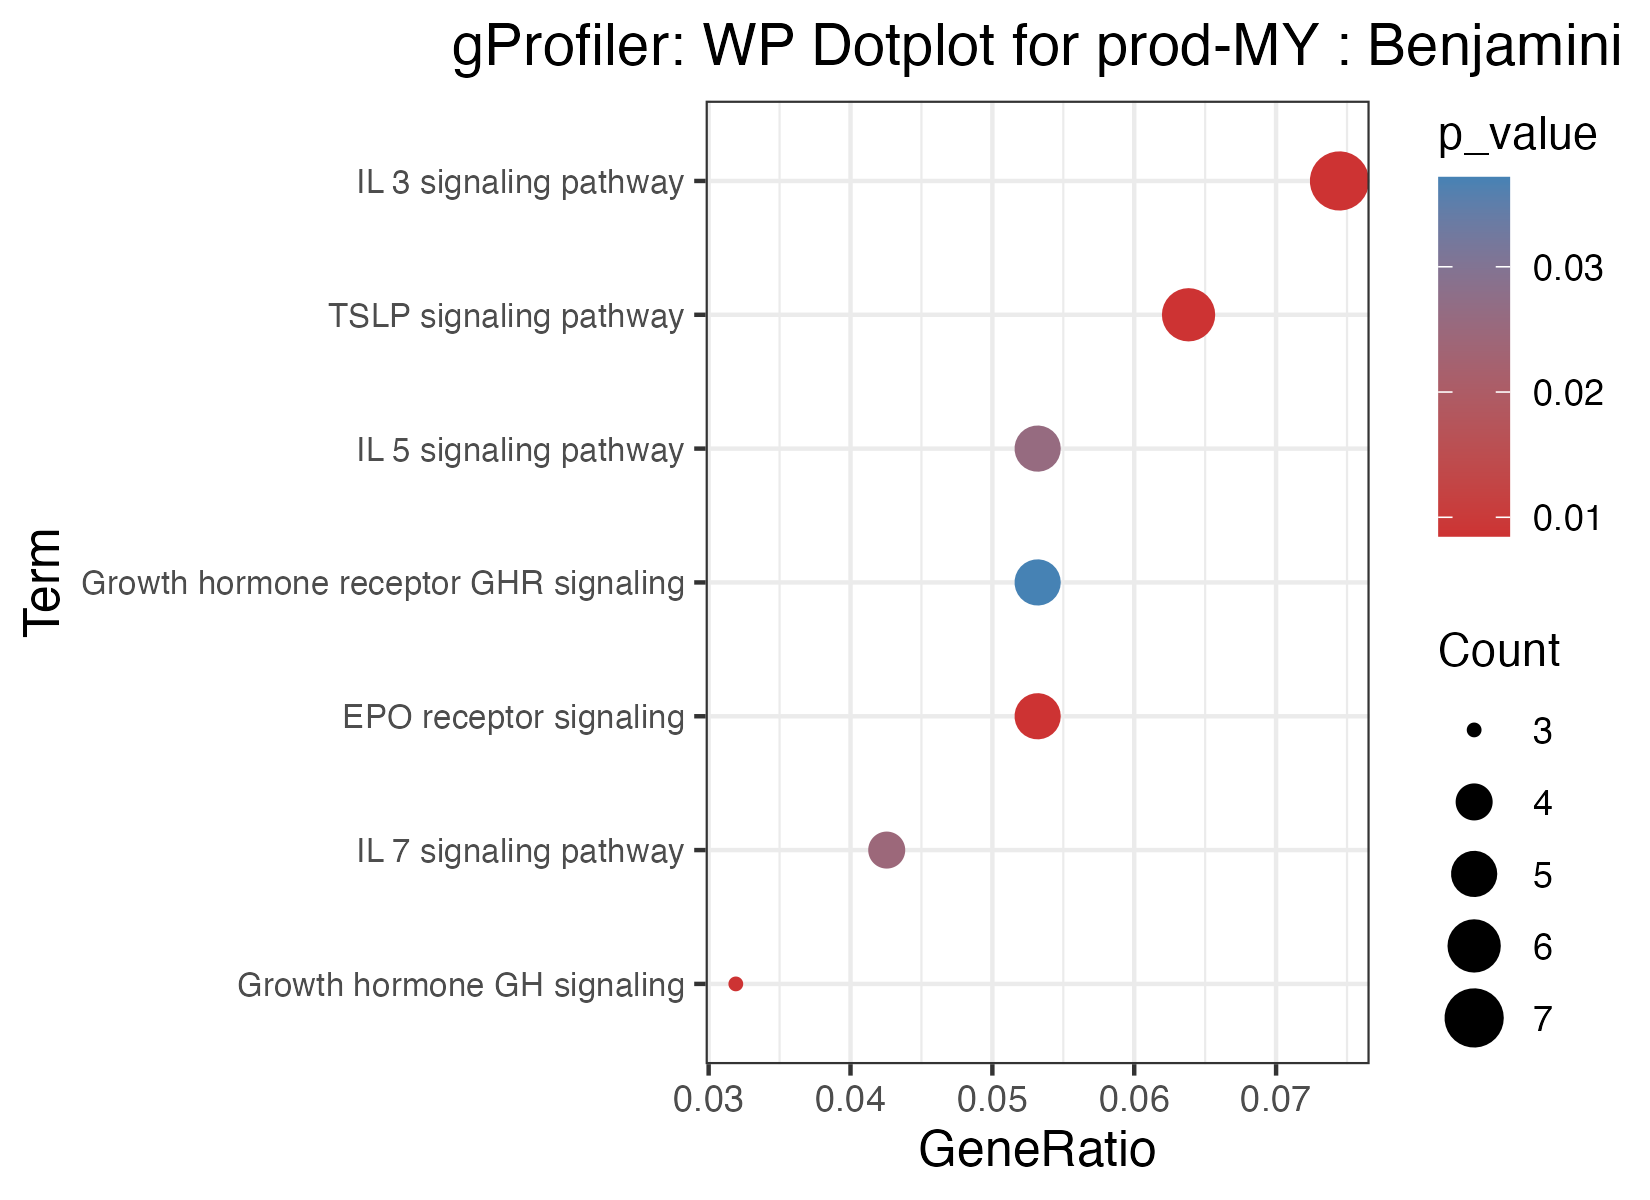


**Supp Figure 3.4.** Gene ratio plot for WikiPathways associated with MY.

**Supp Figures 4. Overrepresentation analysis for Protein Yield (PY)**


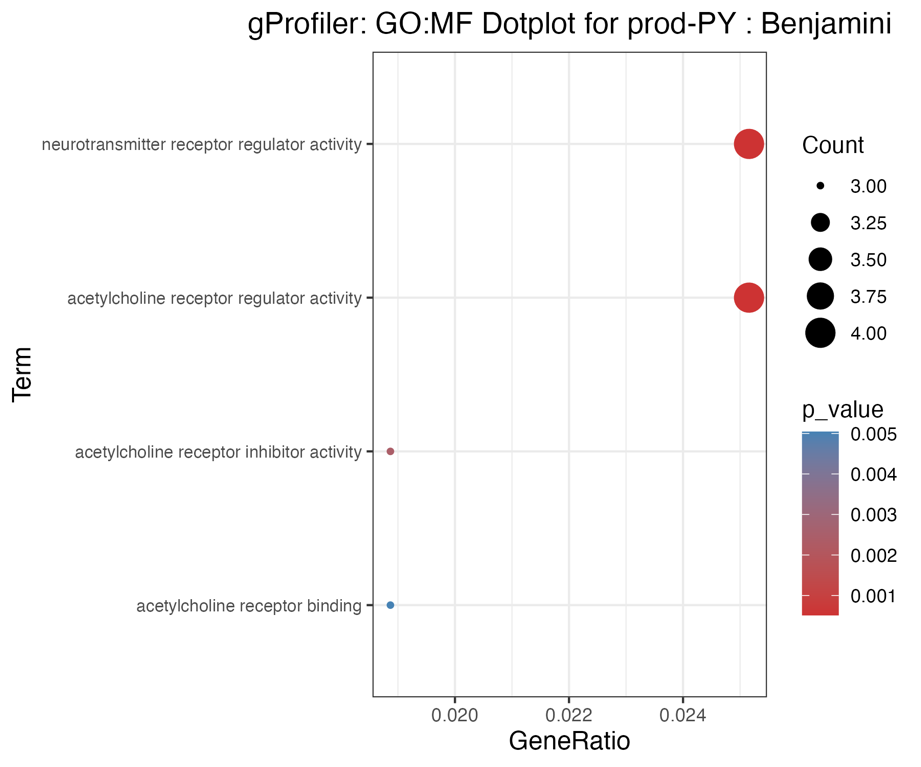


**Supp Figure 4.1.** Gene ratio plot for GO: Molecular Functions associated with PY.


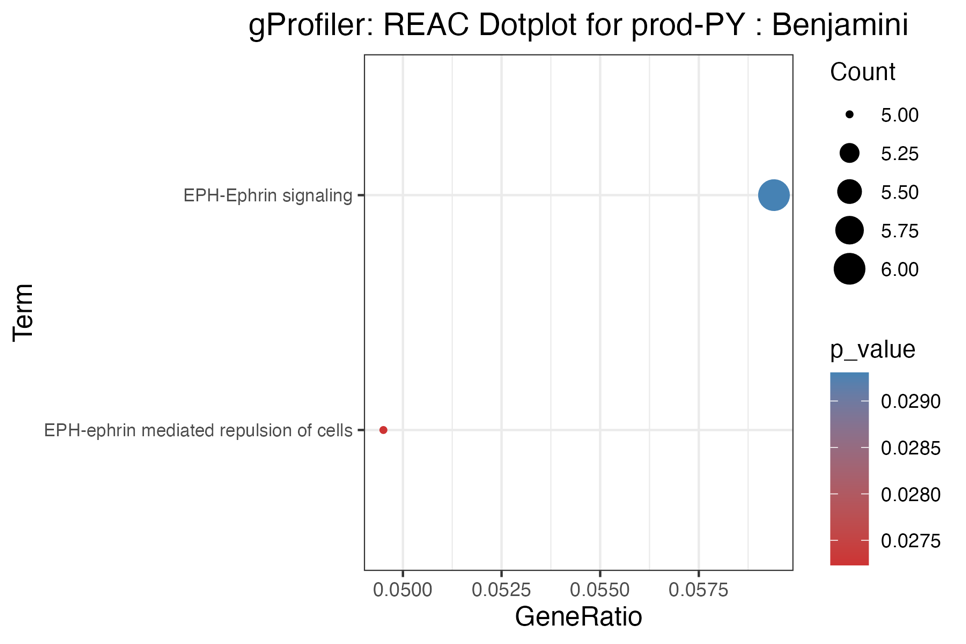


**Supp Figure 4.2**. Gene ratio plot for Reactome Pathways associated with PY.

**Supp Figure 5. Overrepresentation analysis for Fat Yield (FY) Trait**


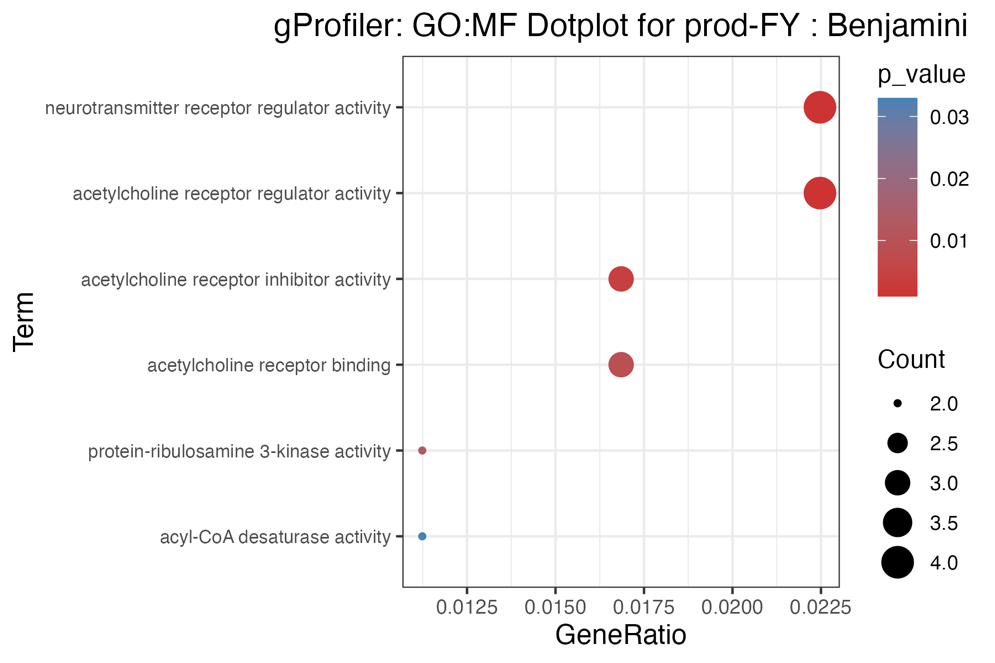


**Supp Figure 5.1.** Gene ratio plot for GO: Molecular Functions associated with FY.

**Supp Figure 6. Overrepresentation analysis for Protein Content (PC)**


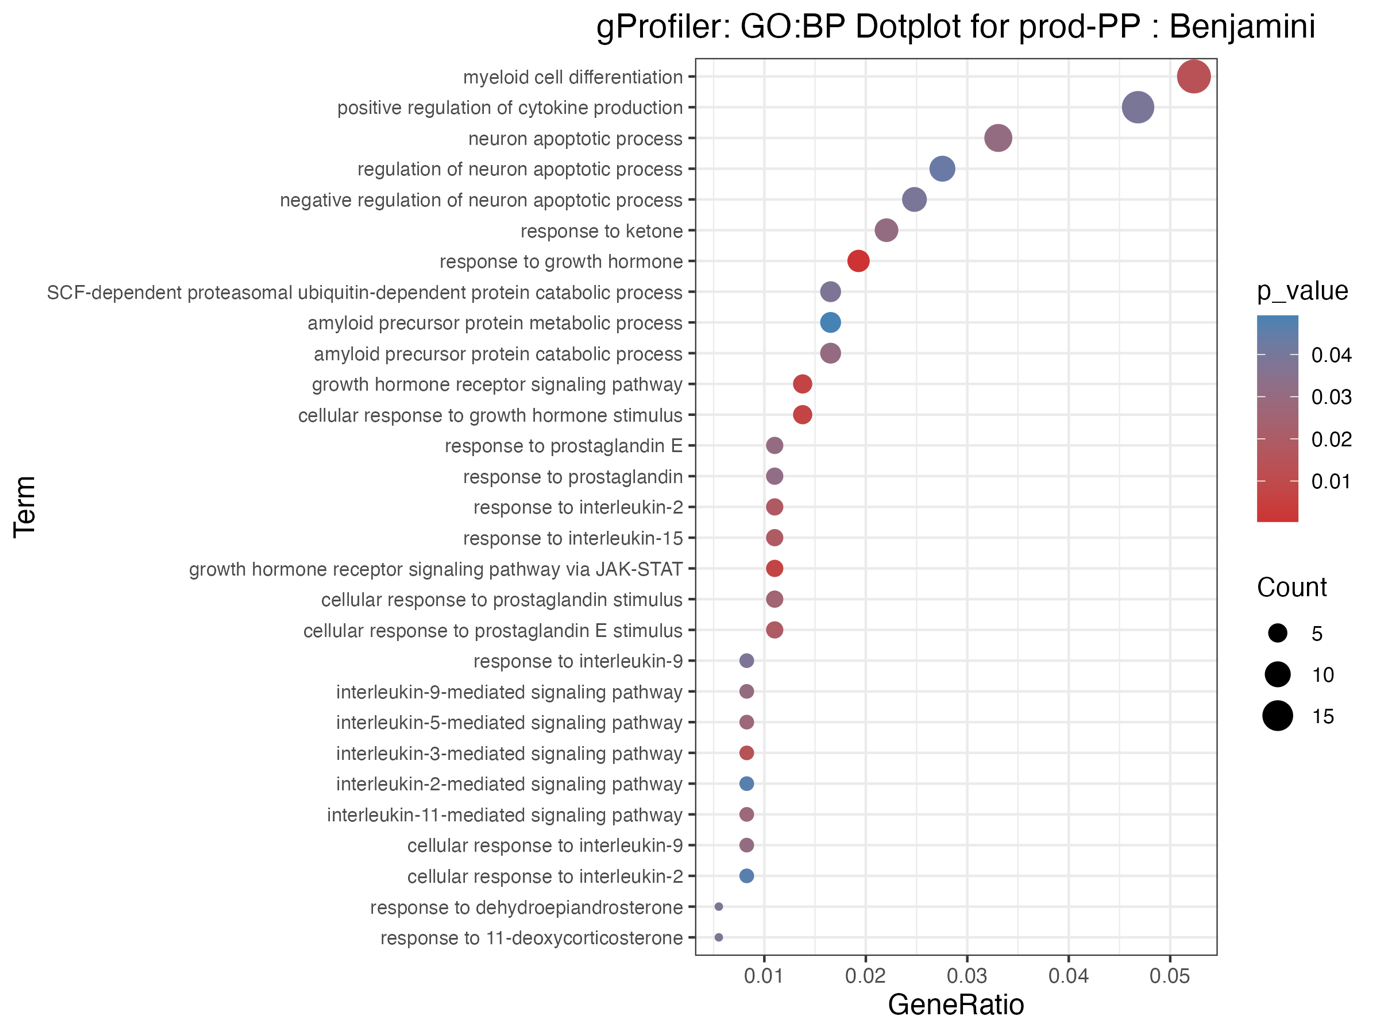


**Supp Figure 6.1.** Gene ratio plot for GO: Biological Processes associated with PC.


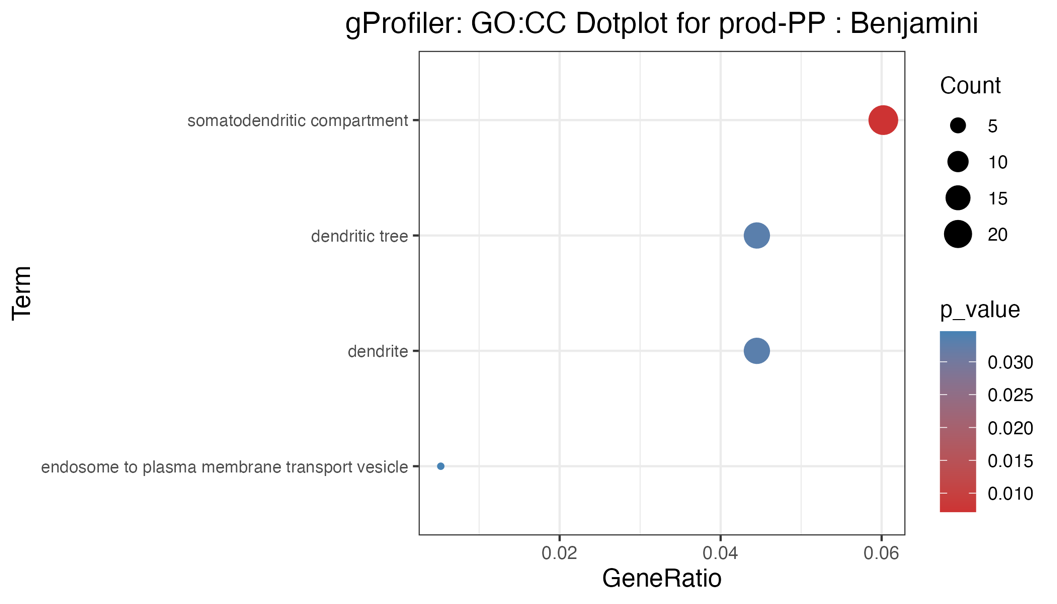


**Supp Figure 6.2.** Gene ratio plot for GO: Cellular Components associated with PC.


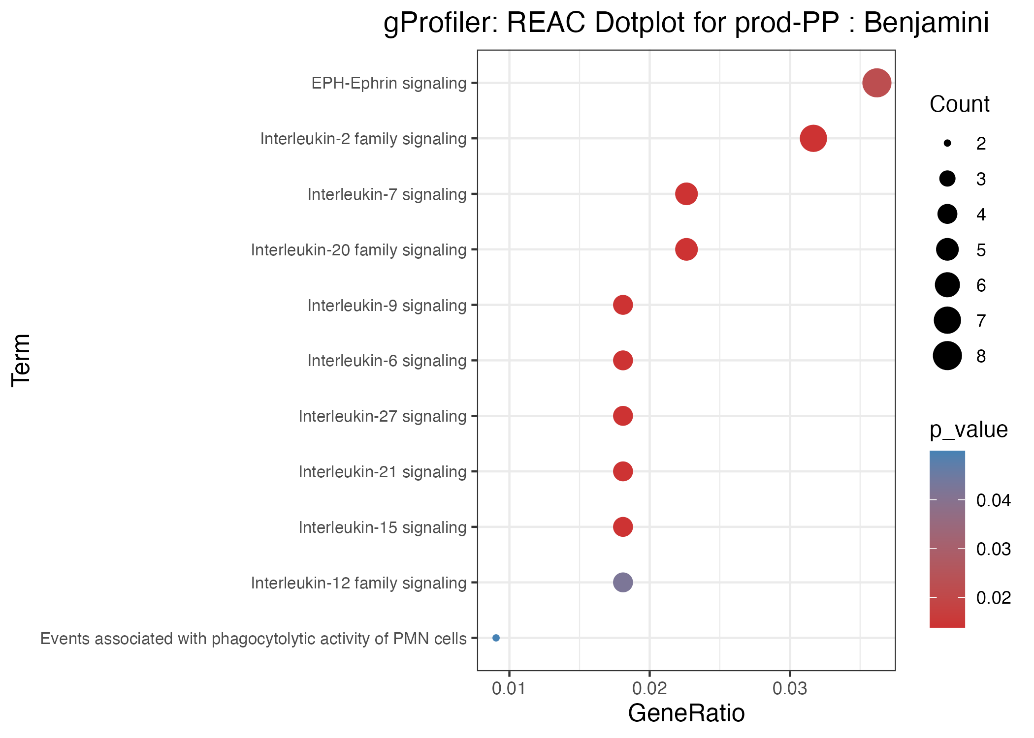


**Supp Figure 6.3.** Gene ratio plot for Reactome Pathways associated with PC.


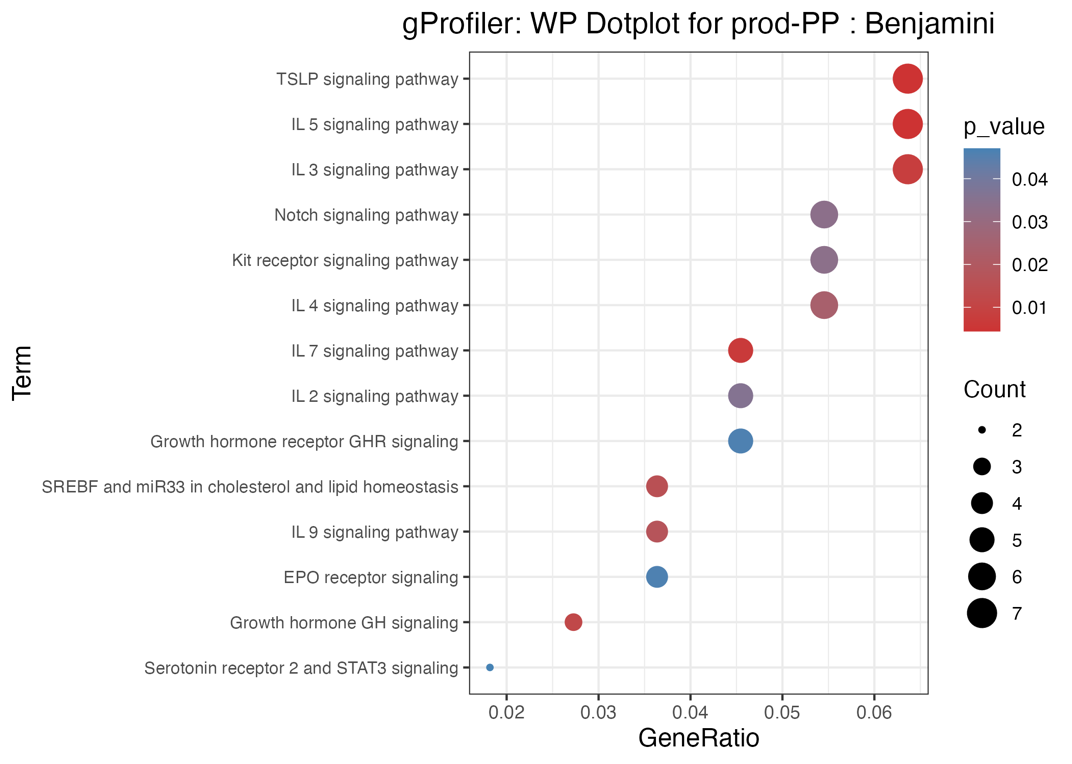


**Supp Figure 6.4.** Gene ratio plot for WikiPathways associated with PC.

**Supp Figure 7. Overrepresentation analysis for Fat Content (FC) Trait**


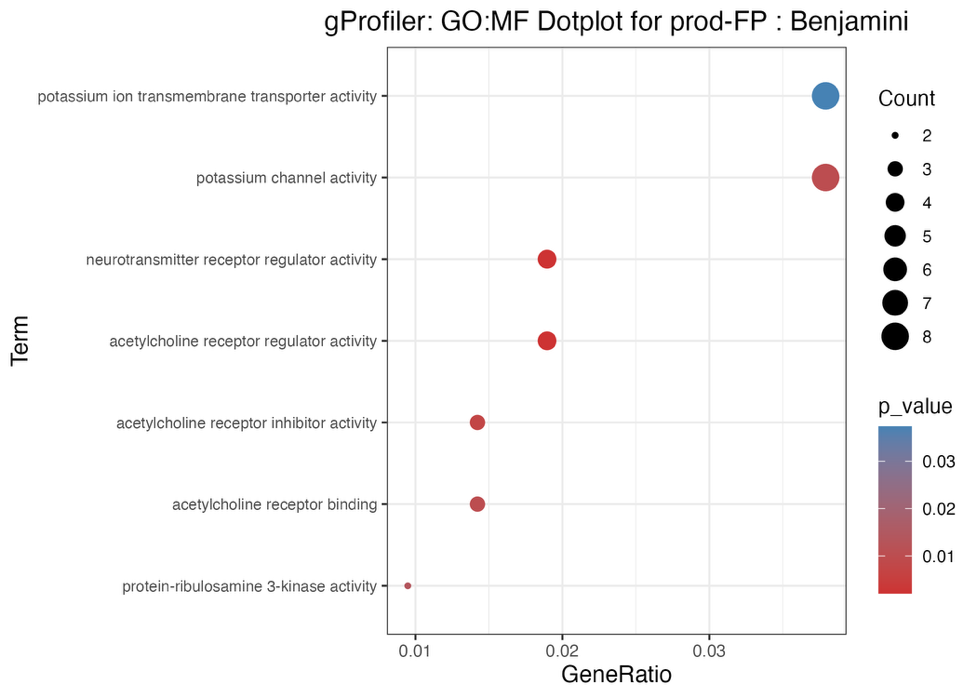


**Supp Figure 7.1.** Gene ratio plot for GO: Molecular Functions associated with FC.


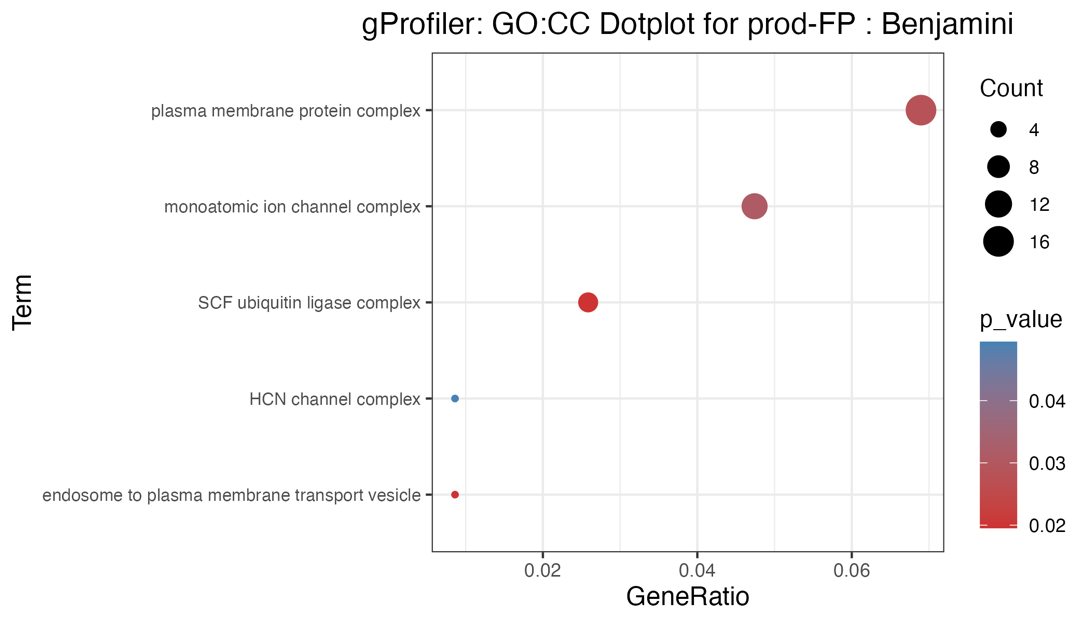


**Supp Figure 7.2.** Gene ratio plot for GO: Cellular Components Functions associated with FC.


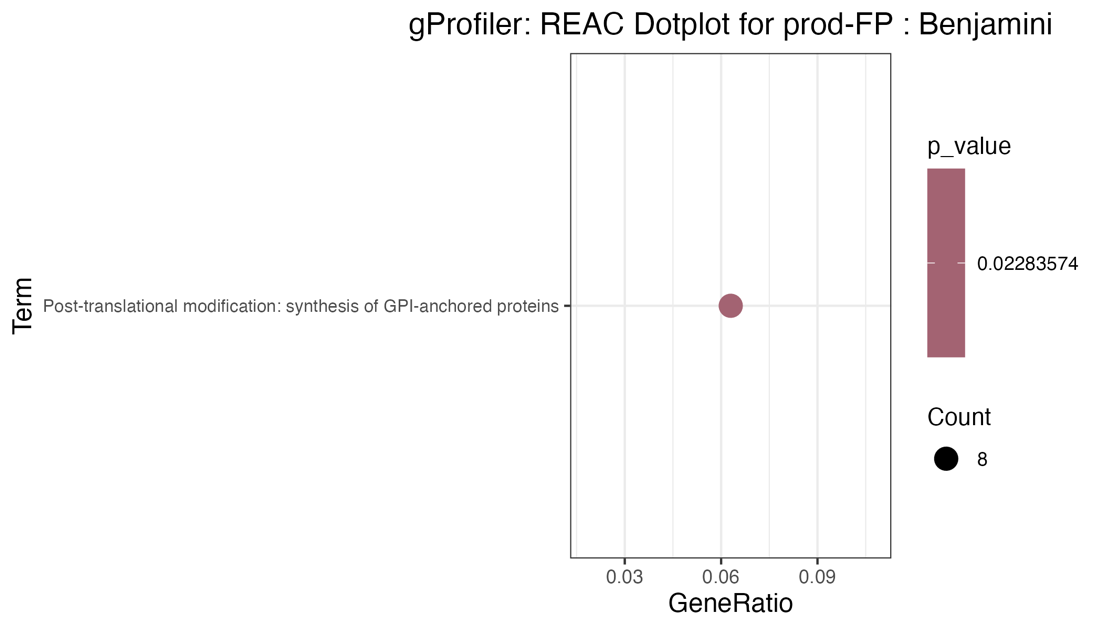


**Supp Figure 7.3.** Gene ratio plot for Reactome Pathways associated with FC.

**Supp Figure 8. Overrepresentation analysis for Hfert**


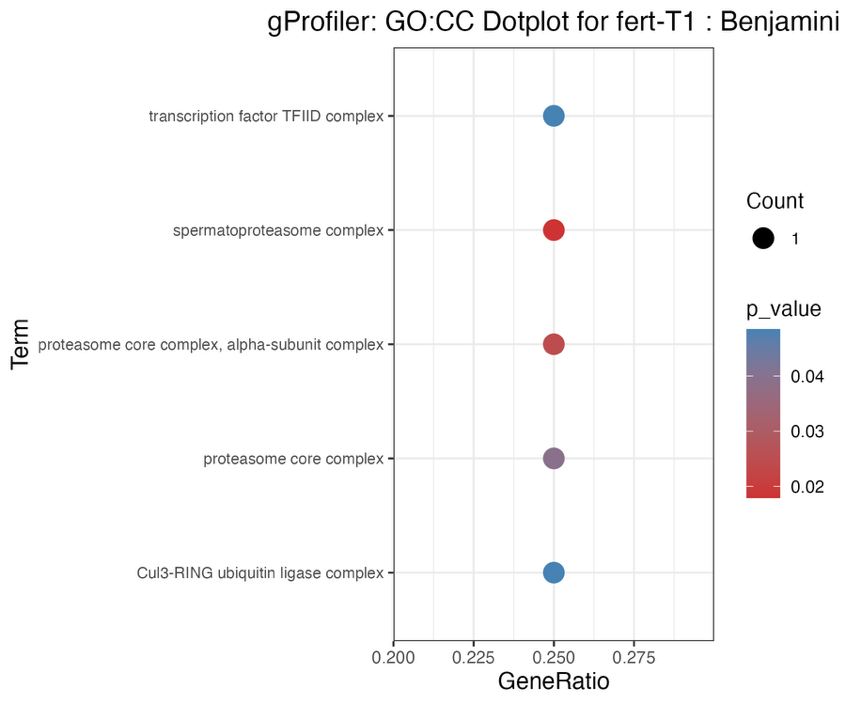


**Supp Figure 8.1**. Gene ratio plot for GO: Cellular Components associated with Hfert.


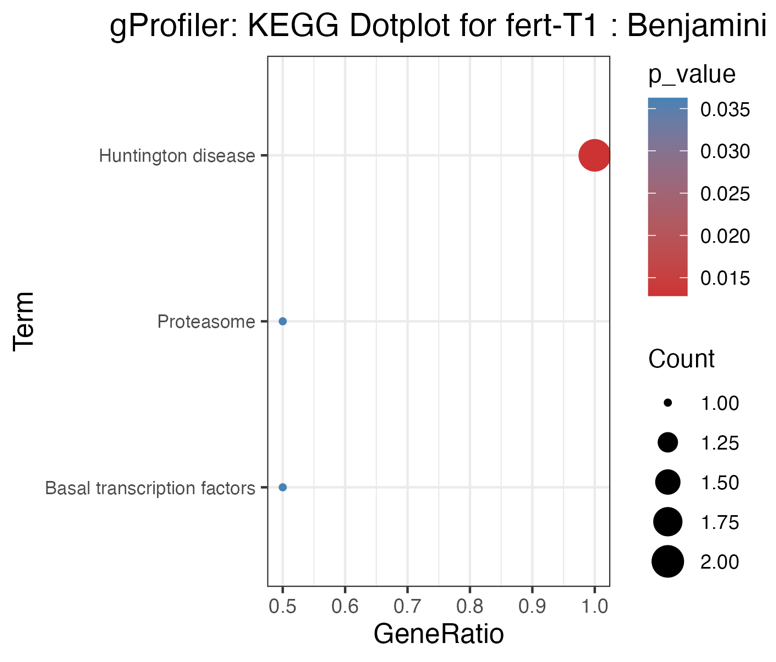


**Supp Figure 8.2.** Gene ratio plot for KEGG associated with Hfert.

**Supp Figure 9. Overrepresentation analysis for CalvMate**


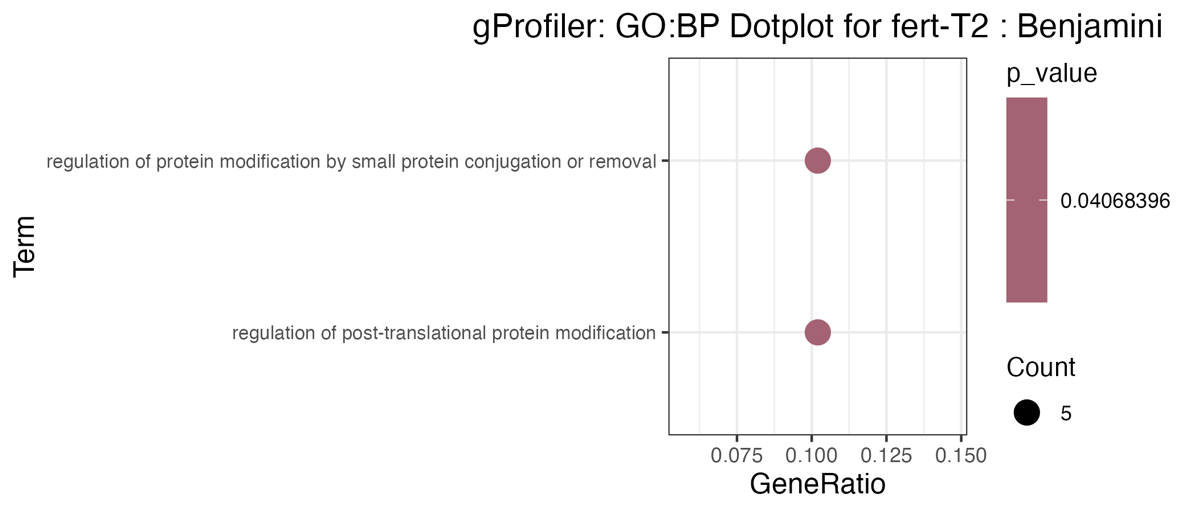


**Supp Figure 9.1.** Gene ratio plot for GO: Biological Processes associated with CalvMate.


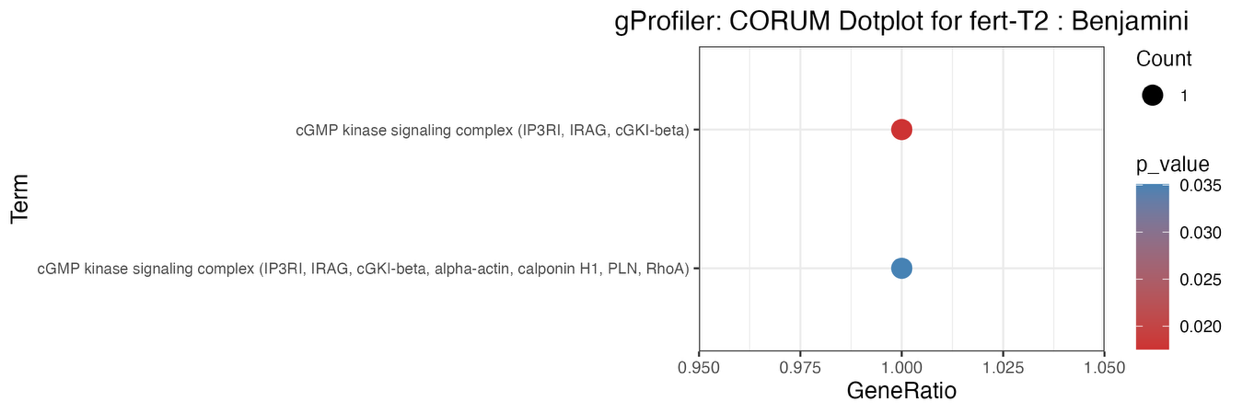


**Supp Figure 9.2.** Gene ratio plot for CORUM associated with CalvMate.

**Supp Figure 10. Overrepresentation analysis for Int1stLast**


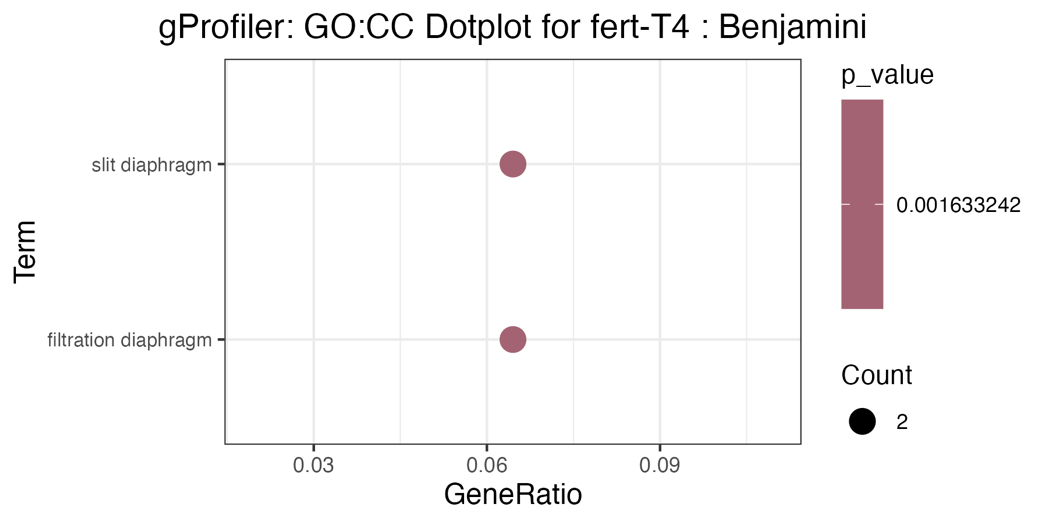


**Supp Figure 10.1.** Gene ratio plot for GO: Cellular Components associated with Int1stLast.


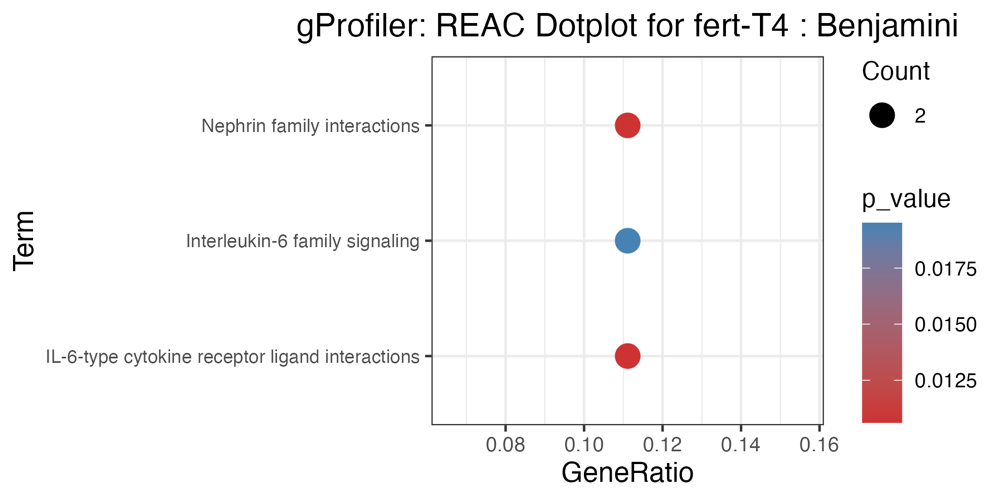


**Supp Figure 10.2.** Gene ratio plot for Reactome Pathways associated with Int1stLast.


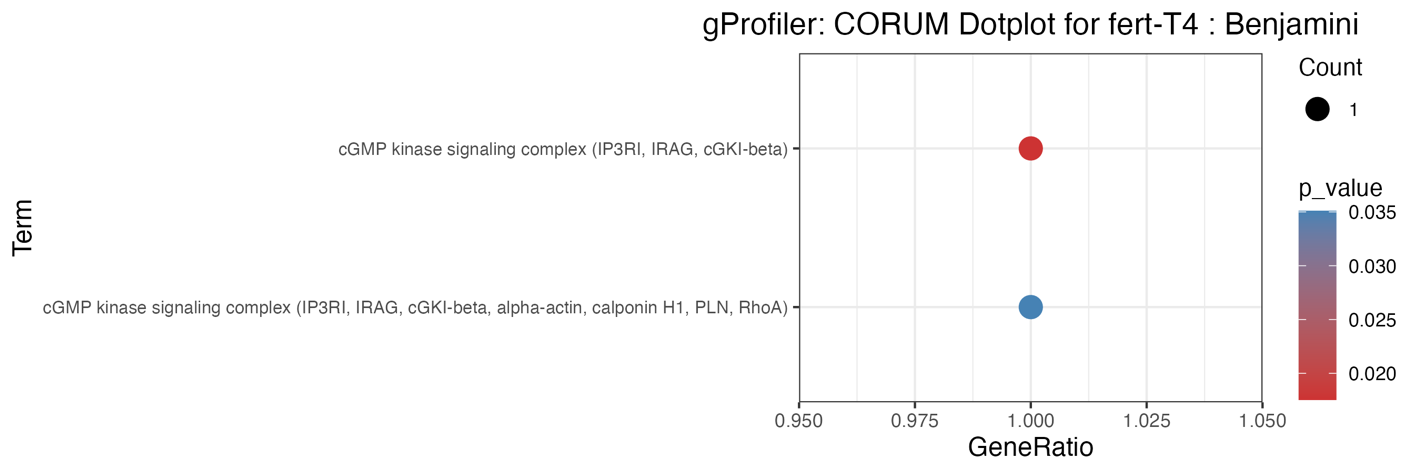


**Supp Figure 10.3.** Gene ratio plot for CORUM associated with int1stlast_T4.

**Supp Figure 11. Overrepresentation analysis for (CalvInt) Trait**


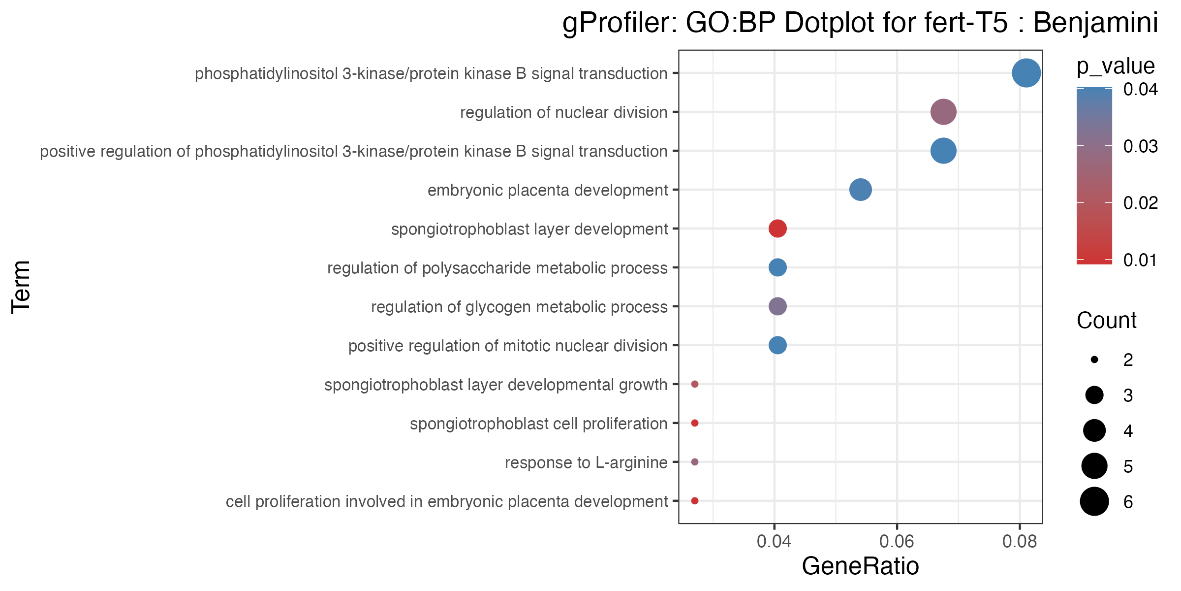


**Supp Figure 11.1.** Gene ratio plot for GO: Biological Processes associated with CalvInt.


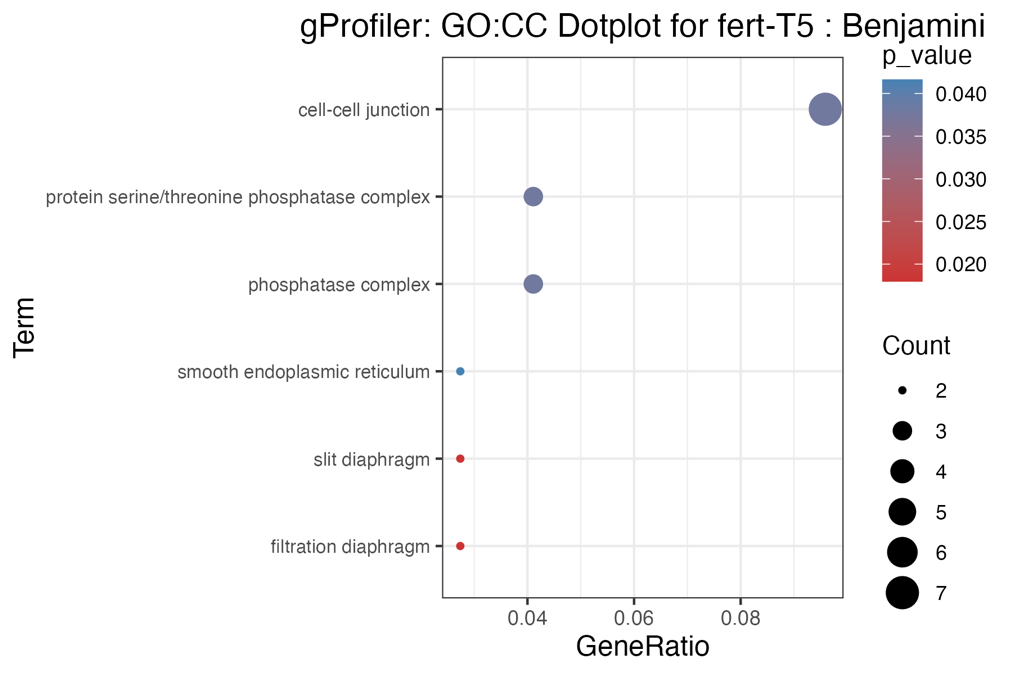


**Supp Figure 11.2.** Gene ratio plot for GO: Cellular Components associated with CalvInt.


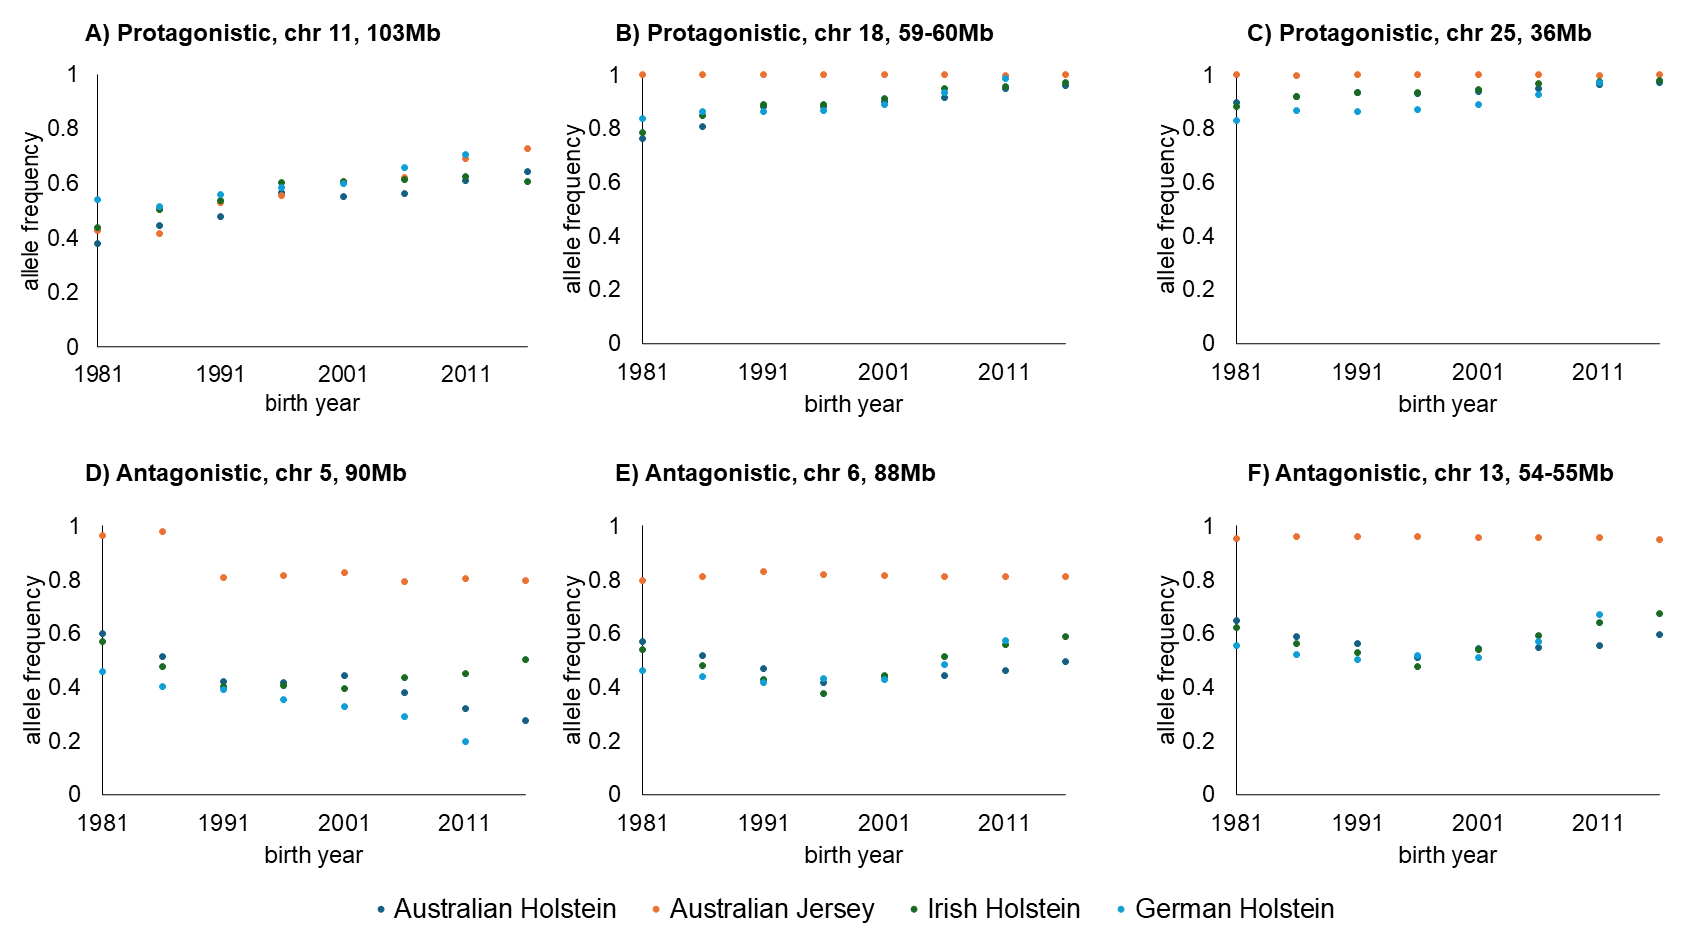


Supp Figure 12. Allele frequency shown for allele that improved fertility in synergistic and antagonistic QTL regions.


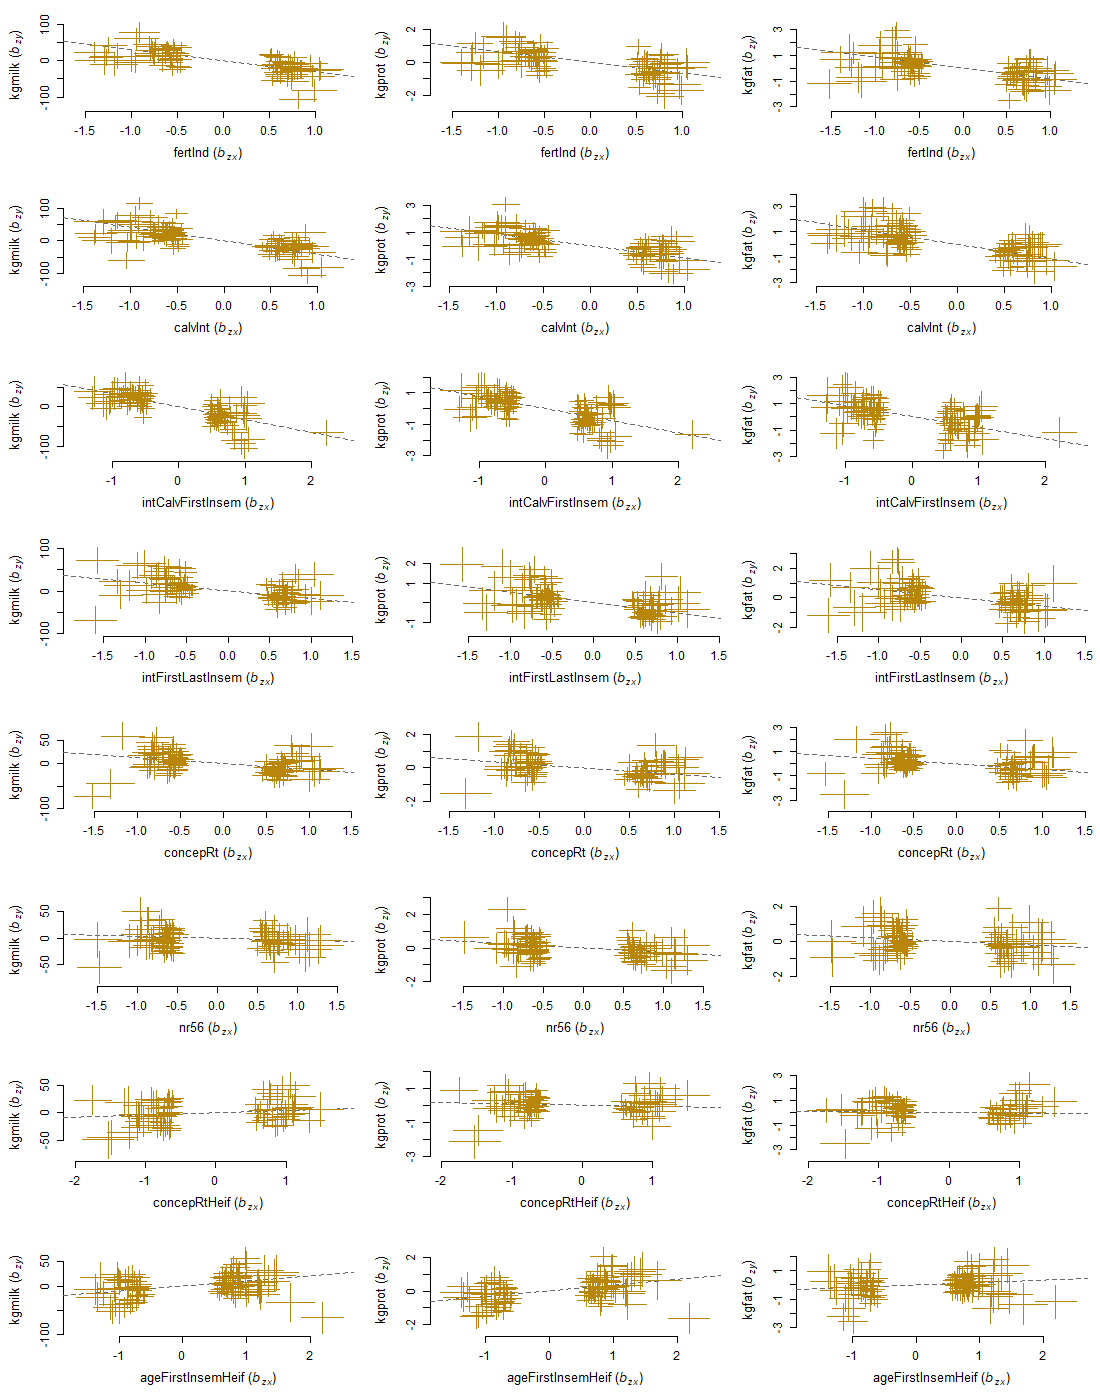


Supp Figure 13. Plots of effect sizes of all the genetic instruments from GWAS for milk production traits as intermediate traits and fertility traits as outcome traits. Error bars represent the standard error of the SNP effect. Dashed line represents the regression line.


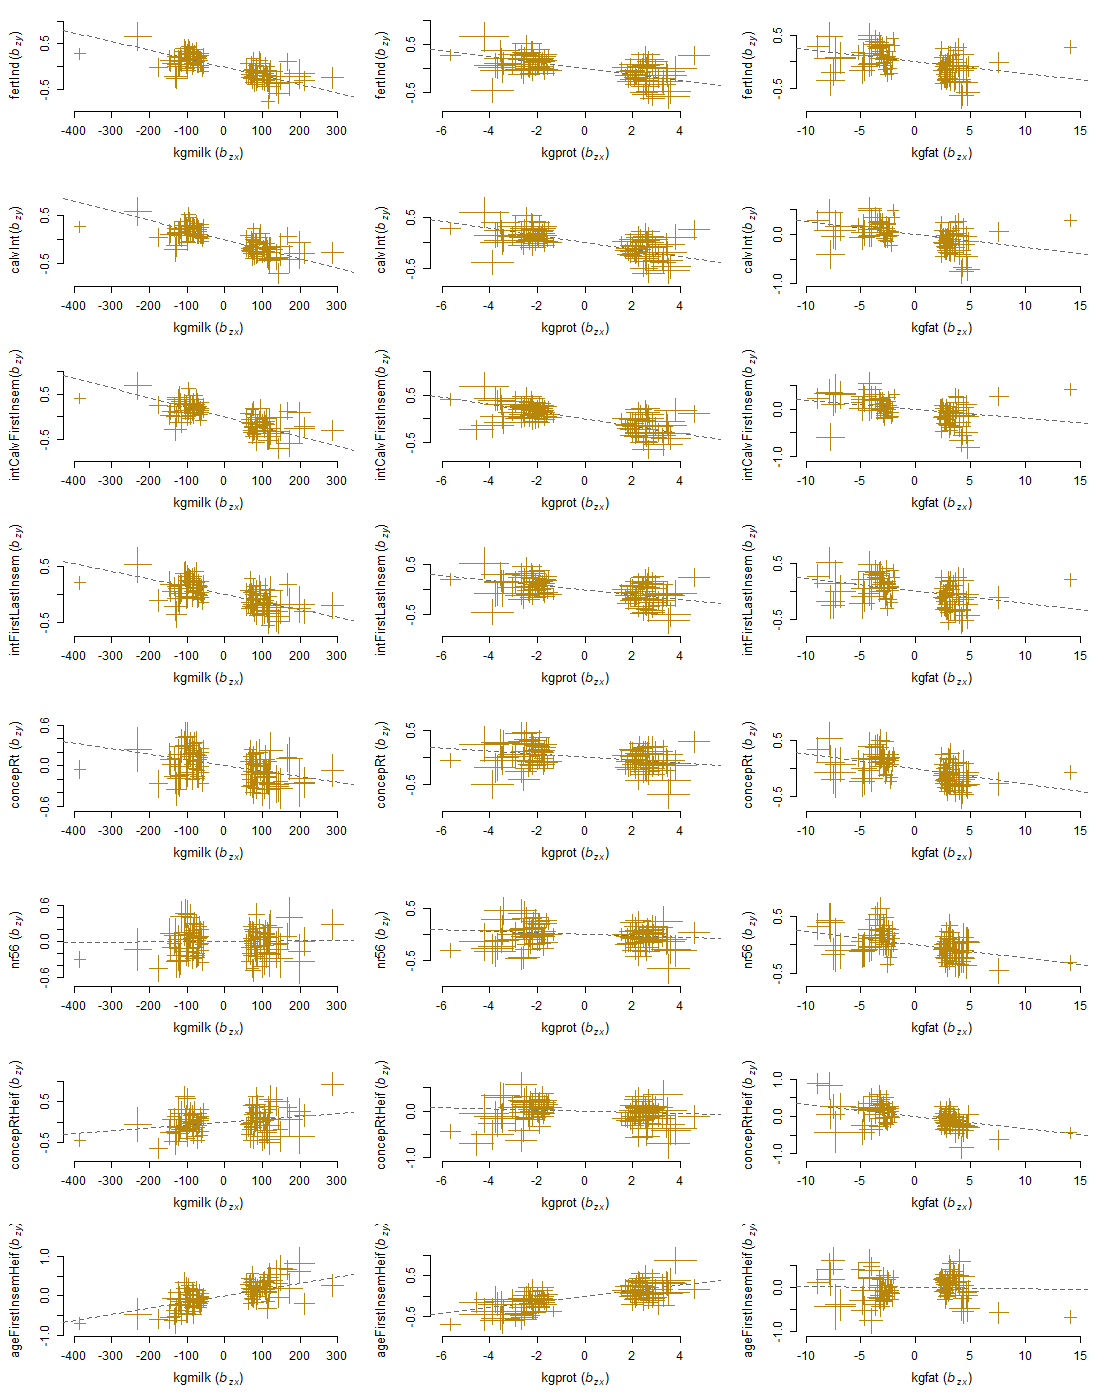


Supp Figure 14. Plots of effect sizes of all the genetic instruments from GWAS for fertility traits as intermediate traits and milk production traits as outcome traits. Error bars represent the standard error of the SNP effect. Dashed line represents the regression line.


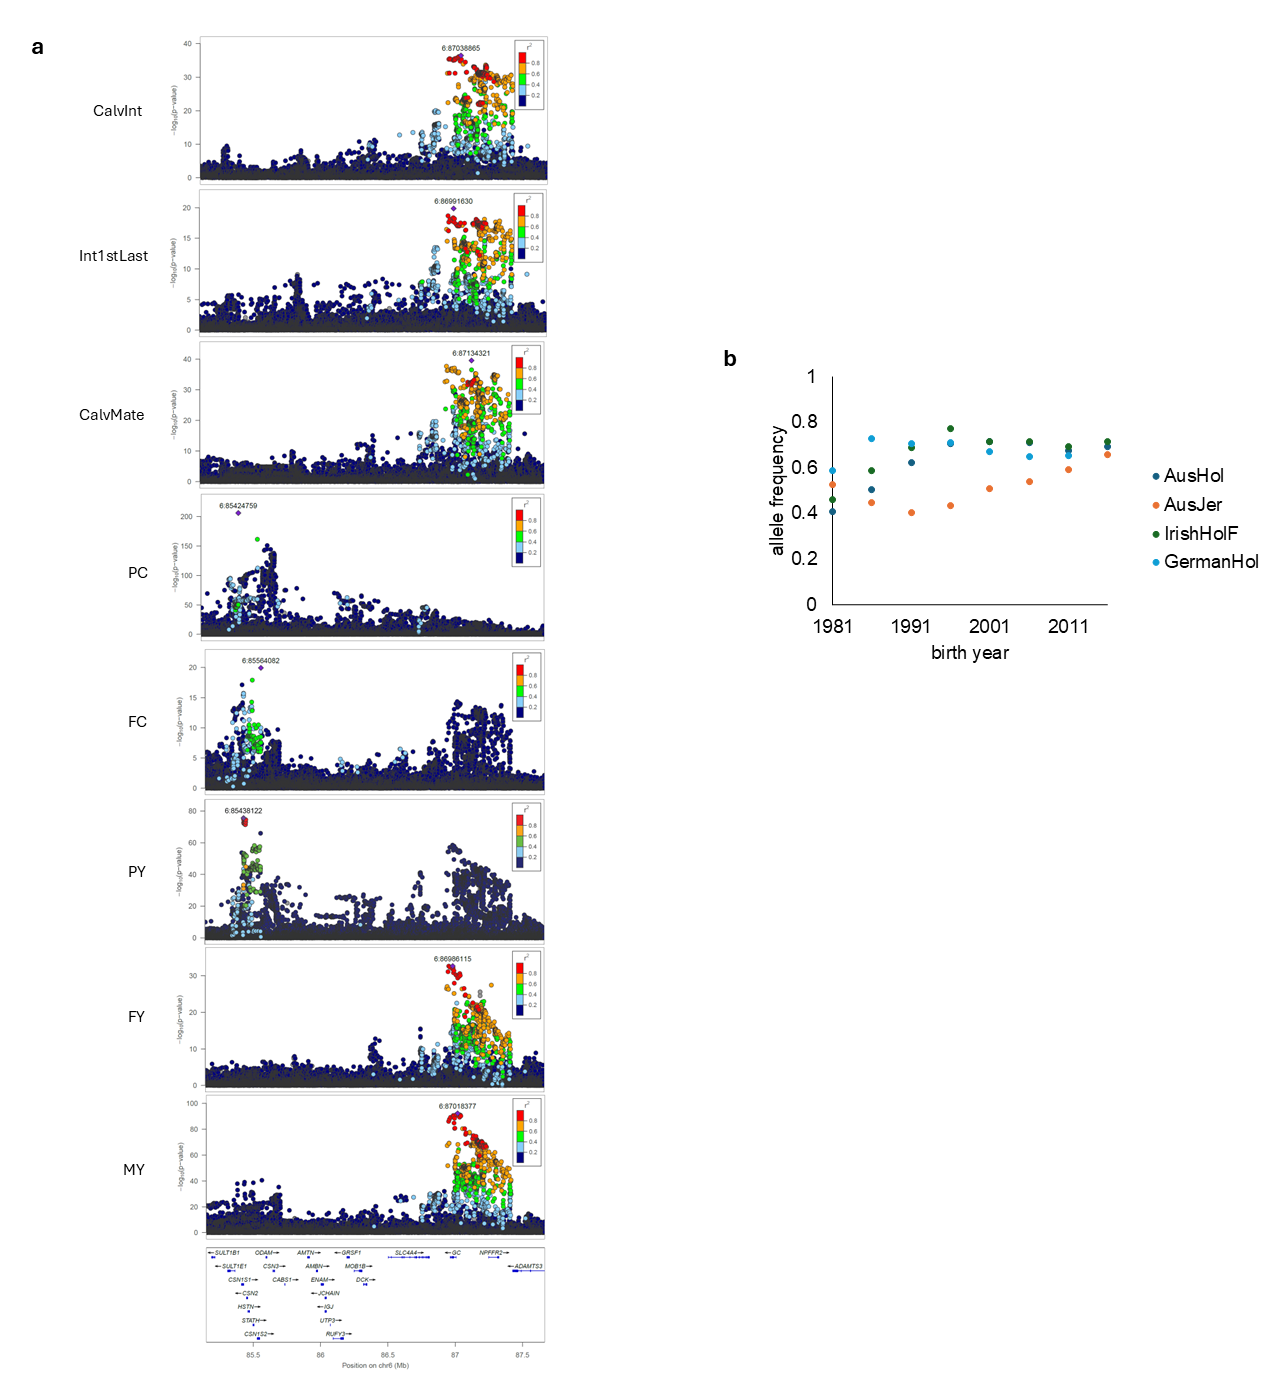


Supp Figure 15. QTL regions on chr 6 at 87Mb. a) LocusZoom plots and LD (*r2*) in top panels respectively, overlap with cattle GTEx and genes (bottom panel) in the region; b) allele frequencies across time for most significant variant in MY QTL at 87Mb (*GC*).


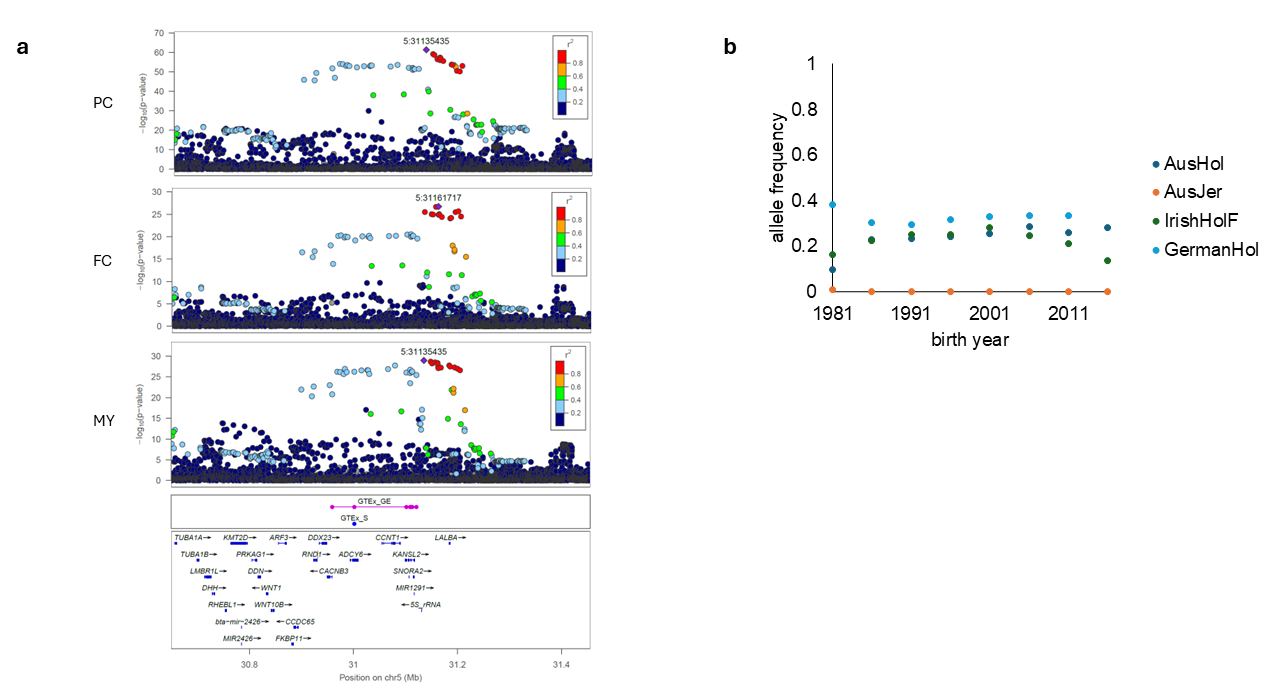


Supp Figure 16. QTL regions on chr 5. a) LocusZoom plots and LD (*r2*), overlap with cattle GTEx and genes in the region; b) allele frequencies across time for most significant variant in QTL at 30-32Mb (*LALBA*).


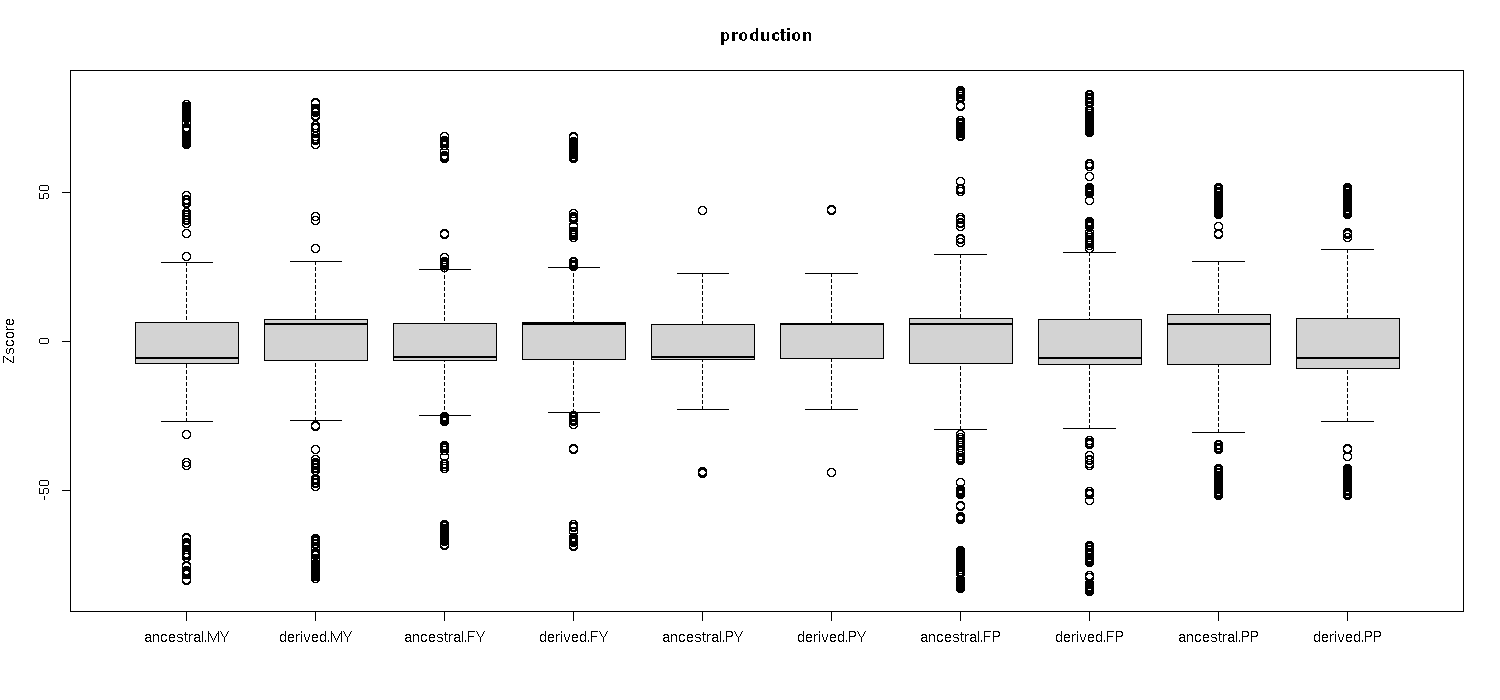


Supp Figure 17. Z-score for ancestral and derived alleles for production traits.


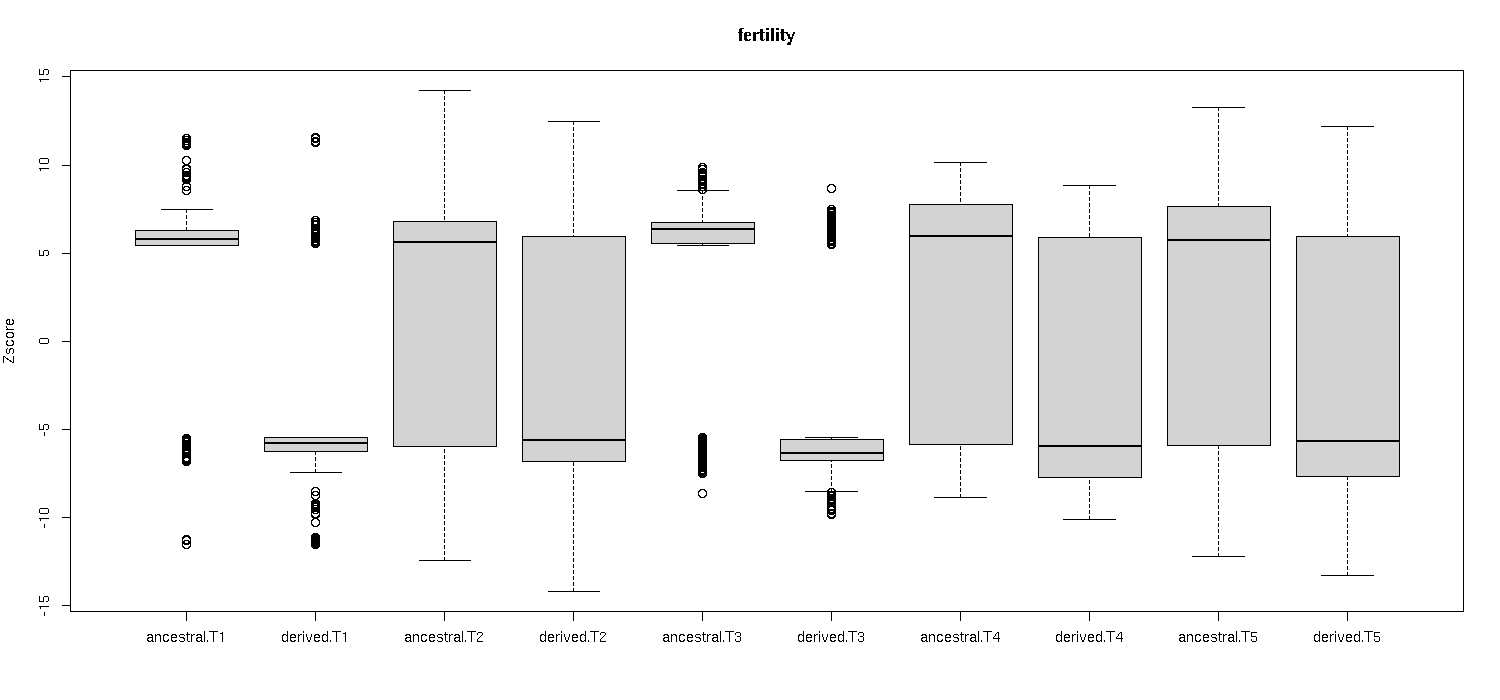


Supp Figure 18. Z-score for ancestral and derived alleles dfor fertility traits


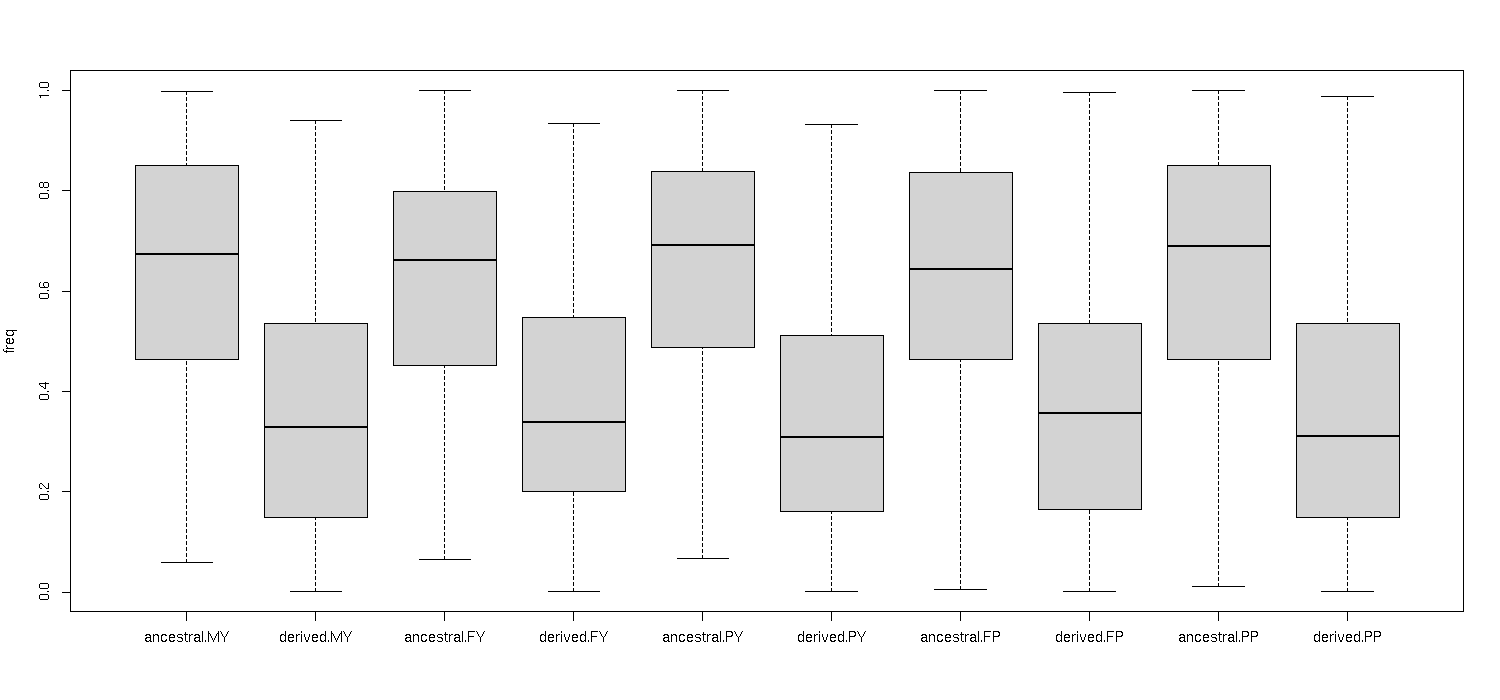


Supp Figure 19. Allele frequency for ancestral and derived alleles for production traits


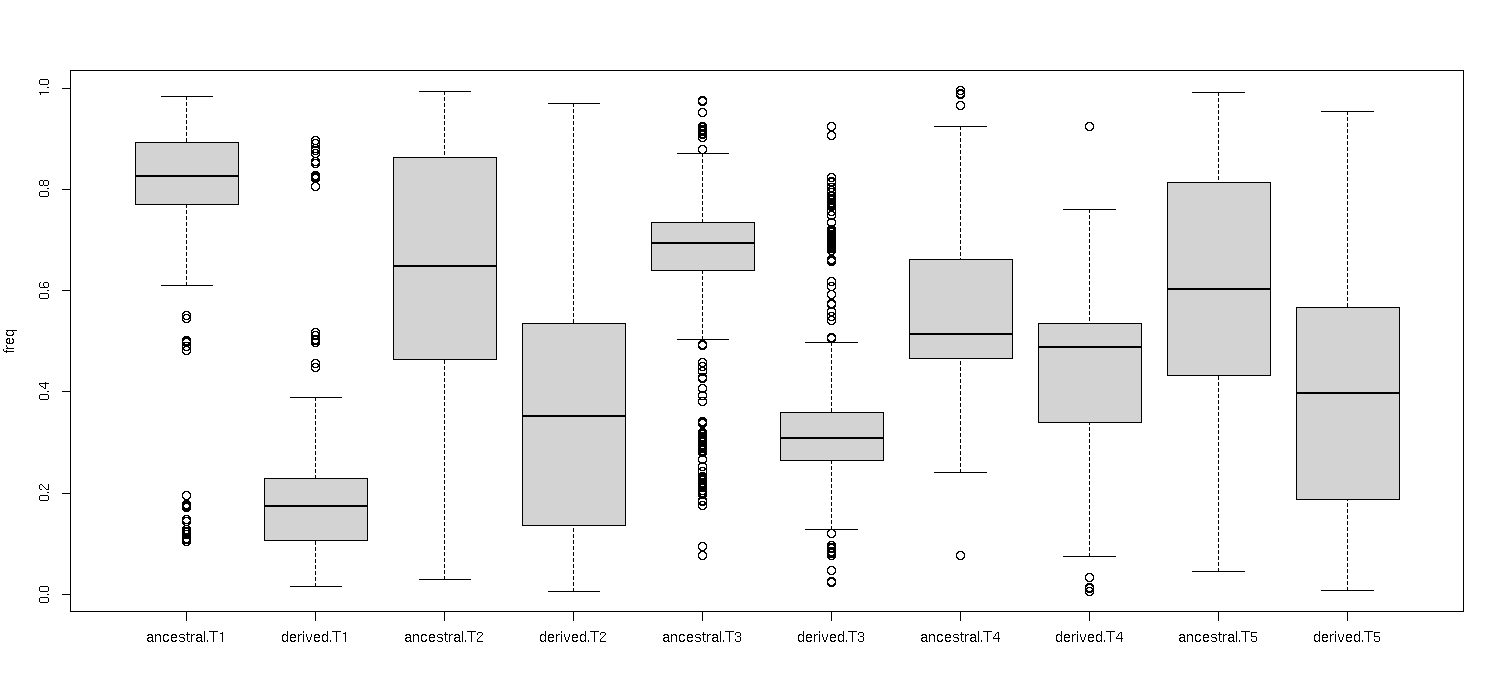


Supp Figure 20. Allele frequency for ancestral and derived alleles for fertility traits

**Supplementary Tables**

Supplementary Tables 2a to 2x. Number of cows and bulls per breed from each organisation and number of cows and bulls in the full multi-breed Meta-GWAS and in each breed group.

Supp Table 2a. Milk yield (MY) individuals per organisation.

| **organisation** | **breed** | **number of cows** | **number of bulls** | **breed category** |
| --- | --- | --- | --- | --- |
| Aarhus University | Holstein | 0 | 5,610 | Holstein |
| Agriculture Victoria | Holstein | 56,843 | 6,323 | Holstein |
| INIA | Holstein | 0 | 3,433 | Holstein |
| INRAE | Holstein | 0 | 10,041 | Holstein |
| Qualitas | Holstein | 8,764 | 3,716 | Holstein |
| Teagasc | Holstein | 32,468 | 48,029 | Holstein |
| VIT | Holstein | 0 | 13,204 | Holstein |
| WUR | Holstein | 0 | 5,798 | Holstein |
| Aarhus University | Jersey | 0 | 1,213 | Jersey |
| Agriculture Victoria | Jersey | 10,210 | 1,476 | Jersey |
| LUKE | Nordic Red | 0 | 5,052 | Red |
| Agriculture Victoria | Australian Red | 3,080 | 0 | Red |
| GENO | Norwegian Red | 32,540 | 0 | Red |
| TUM | Brown Swiss | 0 | 1,645 | Brown |
| ETH | Braunvieh | 12,396 | 3,728 | Brown + Dual purpose |
| INRAE | Montbéliarde | 0 | 3,152 | Dual purpose |
| Qualitas | Swiss Fleckvieh | 1,272 | 835 | Dual purpose |
| Qualitas | Simmental | 1,159 | 977 | Dual purpose |
| TUM | Fleckvieh | 0 | 6,184 | Dual purpose |
| INRAE | Normande | 0 | 2,693 | Normande |
| total |  | 158,732 | 123,109 |  |

Supp Table 2b. Milk yield (MY) Meta-GWAS

| **meta-GWAS** | **total number of cows** | **total number of bulls** | **total number of individuals** |
| --- | --- | --- | --- |
| multi breed | 158,732 | 123,109 | 281,841 |
| Holstein | 98,075 | 96,154 | 194,229 |
| Jersey | 10,210 | 2,689 | 12,899 |
| Red | 35,620 | 5,052 | 40,672 |
| Brown | 12,396 | 5,373 | 17,769 |
| Dual purpose | 14,827 | 14,876 | 29,703 |
| Normande | 0 | 2,693 | 2,693 |

Supp Table 2c. Fat yield (FY) individuals per organisation.

| **organisation** | **breed** | **number of cows** | **number of bulls** | **breed category** |
| --- | --- | --- | --- | --- |
| Aarhus University | Holstein | 0 | 5,610 | Holstein |
| Agriculture Victoria | Holstein | 56,843 | 6,323 | Holstein |
| INIA | Holstein | 0 | 3,433 | Holstein |
| INRAE | Holstein | 0 | 10,039 | Holstein |
| Qualitas | Holstein | 8,763 | 3,714 | Holstein |
| Teagasc | Holstein | 32,468 | 48,029 | Holstein |
| VIT | Holstein | 0 | 13,204 | Holstein |
| WUR | Holstein | 0 | 5,798 | Holstein |
| Aarhus University | Jersey | 0 | 1,141 | Jersey |
| Agriculture Victoria | Jersey | 10,210 | 1,476 | Jersey |
| LUKE | Nordic Red | 0 | 5,052 | Red |
| Agriculture Victoria | Australian Red | 3,080 | 0 | Red |
| GENO | Norwegian Red | 32,506 | 0 | Red |
| TUM | Brown Swiss | 0 | 1,788 | Brown |
| ETH | Braunvieh | 12,388 | 3,724 | Brown + Dual Purpose |
| INRAE | Montbéliarde | 0 | 3,152 | Dual purpose |
| Qualitas | Swiss Fleckvieh | 1,272 | 835 | Dual purpose |
| Qualitas | Simmental | 1,159 | 977 | Dual purpose |
| TUM | Fleckvieh | 0 | 6,206 | Dual purpose |
| INRAE | Normande | 0 | 2,693 | Normande |
| total |  | 158,689 | 123,194 |  |

Supp Table 2d. Fat yield (FY) Meta-GWAS

| **meta-GWAS** | **total number of cows** | **total number of bulls** | **total number of individuals** |
| --- | --- | --- | --- |
| multi breed | 158,689 | 123,194 | 281,883 |
| Holstein | 98,074 | 96,150 | 194,224 |
| Jersey | 10,210 | 2,617 | 12,827 |
| Red | 35,586 | 5,052 | 40,638 |
| Brown | 12,388 | 5,512 | 17,900 |
| Dual purpose | 14,819 | 14,894 | 29,713 |
| Normande | 0 | 2,693 | 2,693 |

Supp Table 2e. Protein yield (PY) individuals per organisation.

| **organisation** | **breed** | **number of cows** | **number of bulls** | **breed category** |
| --- | --- | --- | --- | --- |
| Aarhus University | Holstein | 0 | 5,551 | Holstein |
| Agriculture Victoria | Holstein | 56,843 | 6,323 | Holstein |
| INIA | Holstein | 0 | 3,433 | Holstein |
| INRAE | Holstein | 0 | 10,041 | Holstein |
| Qualitas | Holstein | 8,757 | 3,714 | Holstein |
| Teagasc | Holstein | 32,468 | 48,029 | Holstein |
| VIT | Holstein | 0 | 13,204 | Holstein |
| WUR | Holstein | 0 | 5,798 | Holstein |
| Aarhus University | Jersey | 0 | 1,147 | Jersey |
| Agriculture Victoria | Jersey | 10,210 | 1,476 | Jersey |
| LUKE | Nordic Red | 0 | 5,038 | Red |
| Agriculture Victoria | Australian Red | 3,080 | 0 | Red |
| GENO | Norwegian Red | 32,540 | 0 | Red |
| TUM | Brown Swiss | 0 | 1,783 | Brown |
| ETH | Braunvieh | 12,061 | 3,723 | Brown + Dual Purpose |
| INRAE | Montbéliarde | 0 | 3,152 | Dual purpose |
| Qualitas | Swiss Fleckvieh | 1,271 | 835 | Dual purpose |
| Qualitas | Simmental | 1,159 | 977 | Dual purpose |
| TUM | Fleckvieh | 0 | 6,337 | Dual purpose |
| INRAE | Normande | 0 | 2,693 | Normande |
| total |  | 158,389 | 123,254 |  |

Supp Table 2f. Protein yield (PY) Meta-GWAS

| **meta-GWAS** | **total number of cows** | **total number of bulls** | **total number of individuals** |
| --- | --- | --- | --- |
| multi breed | 158,389 | 123,254 | 281,643 |
| Holstein | 98,068 | 96,093 | 194,161 |
| Jersey | 10,210 | 2,623 | 12,833 |
| Red | 35,620 | 5,038 | 40,658 |
| Brown | 12,061 | 5,506 | 17,567 |
| Dual purpose | 14,491 | 15,024 | 29,515 |
| Normande | 0 | 2,693 | 2,693 |

Supp Table 2g. Fat Content (FC) individuals per organisation.

| **organisation** | **breed** | **number of cows** | **number of bulls** | **breed category** |
| --- | --- | --- | --- | --- |
| Aarhus University | Holstein | 0 | 5,610 | Holstein |
| Agriculture Victoria | Holstein | 56,843 | 6,323 | Holstein |
| INRAE | Holstein | 0 | 10,053 | Holstein |
| Qualitas | Holstein | 8,763 | 3,714 | Holstein |
| Teagasc | Holstein | 32,171 | 47,653 | Holstein |
| Aarhus University | Jersey | 0 | 1,141 | Jersey |
| Agriculture Victoria | Jersey | 10,210 | 1,476 | Jersey |
| LUKE | Nordic Red | 0 | 5,052 | Red |
| Agriculture Victoria | Australian Red | 3,080 | 0 | Red |
| GENO | Norwegian Red | 32,506 | 0 | Red |
| TUM | Brown Swiss | 0 | 1,788 | Brown |
| ETH | Braunvieh | 12,434 | 3,747 | Brown + Dual Purpose |
| INRAE | Montbéliarde | 0 | 3,157 | Dual purpose |
| Qualitas | Swiss Fleckvieh | 1,272 | 835 | Dual purpose |
| Qualitas | Simmental | 1,159 | 977 | Dual purpose |
| TUM | Fleckvieh | 0 | 6,424 | Dual purpose |
| INRAE | Normande | 0 | 2,697 | Normande |
| total |  | 158,438 | 100,647 |  |

Supp Table 2h. Fat content (FC) Meta-GWAS

| **meta-GWAS** | **total number of cows** | **total number of bulls** | **total number of individuals** |
| --- | --- | --- | --- |
| multi breed | 158,438 | 100,647 | 259,085 |
| Holstein | 97,777 | 73,353 | 171,130 |
| Jersey | 10,210 | 2,617 | 12,827 |
| Red | 35,586 | 5,052 | 40,638 |
| Brown | 12,434 | 5,535 | 17,969 |
| Dual purpose | 14,865 | 15,140 | 30,005 |
| Normande | 0 | 2,697 | 2,697 |

Supp Table 2i. Protein Content (PC) individuals per organisation.

| **organisation** | **breed** | **number of cows** | **number of bulls** | **breed category** |
| --- | --- | --- | --- | --- |
| Aarhus University | Holstein | 0 | 5,610 | Holstein |
| Agriculture Victoria | Holstein | 56,843 | 6,323 | Holstein |
| INRAE | Holstein | 0 | 10,053 | Holstein |
| Qualitas | Holstein | 8,763 | 3,714 | Holstein |
| Teagasc | Holstein | 32,171 | 47,653 | Holstein |
| Aarhus University | Jersey | 0 | 1,141 | Jersey |
| Agriculture Victoria | Jersey | 10,210 | 1,476 | Jersey |
| LUKE | Nordic Red | 0 | 5,052 | Red |
| Agriculture Victoria | Australian Red | 3,080 | 0 | Red |
| GENO | Norwegian Red | 32,506 | 0 | Red |
| TUM | Brown Swiss | 0 | 1,788 | Brown |
| ETH | Braunvieh | 12,434 | 3,747 | Brown + Dual Purpose |
| INRAE | Montbéliarde | 0 | 3,157 | Dual purpose |
| Qualitas | Swiss Fleckvieh | 1,272 | 835 | Dual purpose |
| Qualitas | Simmental | 1,159 | 977 | Dual purpose |
| TUM | Fleckvieh | 0 | 6,424 | Dual purpose |
| INRAE | Normande | 0 | 2,697 | Normande |
| total |  | 158,438 | 100,647 |  |

Supp Table 2j. Protein content (PC) Meta-GWAS

| **meta-GWAS** | **total number of cows** | **total number of bulls** | **total number of individuals** |
| --- | --- | --- | --- |
| multi breed | 158,438 | 100,647 | 259,085 |
| Holstein | 97,777 | 73,353 | 171,130 |
| Jersey | 10,210 | 2,617 | 12,827 |
| Red | 35,586 | 5,052 | 40,638 |
| Brown | 12,434 | 5,535 | 17,969 |
| Dual purpose | 14,865 | 15,140 | 30,005 |
| Normande | 0 | 2,697 | 2,697 |

Supp Table 2k. Heifer fertility (HFert, T1) individuals per organisation.

| **organisation** | **breed** | **description** | **number of cows** | **number of bulls** | **breed category** |
| --- | --- | --- | --- | --- | --- |
| INRAE | Holstein | conception rate | 0 | 9,674 | Holstein |
| Qualitas | Holstein | non return rate | 1,383 | 2,345 | Holstein |
| Qualitas | Holstein | interval first to last insemination | 1,236 | 2,257 | Holstein |
| VIT | Holstein | conception rate | 0 | 13,126 | Holstein |
| WUR | Holstein | conception rate | 0 | 5,797 | Holstein |
| WUR | Holstein | age first insemination | 0 | 5,750 | Holstein |
| GENO | Norwegian Red | number of inseminations before conception | 30,301 | 0 | Red |
| TUM | Brown Swiss | interval first to last insemination | 0 | 1,995 | Brown |
| TUM | Brown Swiss | non return rate | 0 | 1,958 | Brown |
| INRAE | Montbéliarde | conception rate | 0 | 2,940 | Dual purpose |
| Qualitas | Swiss Fleckvieh | non return rate | 326 | 655 | Dual purpose |
| Qualitas | Swiss Fleckvieh | interval first to last insemination | 300 | 651 | Dual purpose |
| Qualitas | Simmental | non return rate | 187 | 670 | Dual purpose |
| Qualitas | Simmental | interval first to last insemination | 164 | 658 | Dual purpose |
| TUM | Fleckvieh | interval first to last insemination | 0 | 6,886 | Dual purpose |
| TUM | Fleckvieh | non return rate | 0 | 6,979 | Dual purpose |
| INRAE | Normande | conception rate | 0 | 2,503 | Normande |
| total |  |  | 33,897 | 64,844 |  |

Supp Table 2l. Heifer fertility (HFert, T1) Meta-GWAS

| **meta-GWAS** | **total number of cows** | **total number of bulls** | **total number of individuals** |
| --- | --- | --- | --- |
| multi breed | 33,897 | 64,844 | 98,741 |
| Holstein | 2,619 | 38,949 | 41,568 |
| Jersey | 0 | 0 | 0 |
| Red | 30,301 | 0 | 30,301 |
| Brown | 0 | 3,953 | 3,953 |
| Dual purpose | 977 | 19,439 | 20,416 |
| Normande | 0 | 2,503 | 2,503 |

Supp Table 2m. Interval from calving to first mating (CalfMate, T2) individuals per organisation

| **organisation** | **breed** | **description** | **number of cows** | **number of bulls** | **breed category** |
| --- | --- | --- | --- | --- | --- |
| INIA | Holstein | interval calving to first service | 0 | 3,425 | Holstein |
| INRAE | Holstein | interval calving to first service | 0 | 9,717 | Holstein |
| Qualitas | Holstein | interval calving to first service | 1,662 | 2,745 | Holstein |
| VIT | Holstein | interval calving to first service | 0 | 13,167 | Holstein |
| WUR | Holstein | interval calving to first service | 0 | 5,797 | Holstein |
| GENO | Norwegian Red | interval calving to first service | 26,514 | 0 | Red |
| TUM | Brown Swiss | interval calving to first service | 0 | 1,972 | Brown |
| ETH | Braunvieh | interval calving to first service | 4,010 | 3,148 | Brown + Dual purpose |
| INRAE | Montbéliarde | interval calving to first service | 0 | 3,011 | Dual purpose |
| Qualitas | Swiss Fleckvieh | interval calving to first service | 889 | 663 | Dual purpose |
| Qualitas | Simmental | interval calving to first service | 684 | 736 | Dual purpose |
| TUM | Fleckvieh | interval calving to first service | 0 | 6,818 | Dual purpose |
| INRAE | Normande | interval calving to first service | 0 | 2,602 | Dual purpose |
| total |  |  | 33,759 | 53,801 |  |

Supp Table 2n. Interval from calving to first mating (CalfMate, T2) Meta-GWAS

| **meta-GWAS** | **total number of cows** | **total number of bulls** | **total number of individuals** |
| --- | --- | --- | --- |
| multi breed | 33,759 | 53,801 | 87,560 |
| Holstein | 1,662 | 34,851 | 36,513 |
| Jersey | 0 | 0 | 0 |
| Red | 26,514 | 0 | 26,514 |
| Brown | 4,010 | 5,120 | 9,130 |
| Dual purpose | 5,583 | 16,978 | 22,561 |
| Normande | 0 | 2,602 | 2,602 |

Supp Table 2o. Conception rate (Conc, T3) individuals per organisation

| **organisation** | **breed** | **description** | **number of cows** | **number of bulls** | **breed category** |
| --- | --- | --- | --- | --- | --- |
| Aarhus University | Holstein | conception rate | 0 | 5,603 | Holstein |
| INRAE | Holstein | success/failure at insemination | 0 | 9,639 | Holstein |
| Qualitas | Holstein | non return rate | 3,279 | 2,563 | Holstein |
| VIT | Holstein | cow’s ability to conceive, rate trait | 0 | 13,147 | Holstein |
| WUR | Holstein | conception rate | 0 | 5,797 | Holstein |
| WUR | Holstein | non return rate | 0 | 5,750 | Holstein |
| Aarhus University | Jersey | conception rate | 0 | 1,102 | Jersey |
| LUKE | Nordic Red | conception rate | 0 | 5,151 | Red |
| GENO | Norwegian Red | number of inseminations before conception | 23,186 | 0 | Red |
| TUM | Brown Swiss | non return rate | 0 | 1,988 | Brown |
| ETH | Braunvieh | non return rate | 631 | 2,991 | Brown + Dual purpose |
| INRAE | Montbéliarde | success/failure at insemination | 0 | 2,976 | Dual purpose |
| Qualitas | Swiss Fleckvieh | non return rate | 606 | 651 | Dual purpose |
| Qualitas | Simmental | non return rate | 419 | 715 | Dual purpose |
| TUM | Fleckvieh | non return rate | 0 | 6,867 | Dual purpose |
| INRAE | Normande | success/failure at insemination | 0 | 2,595 | Dual purpose |
| total |  |  | 28,121 | 67,535 |  |

Supp Table 2p. Conception rate (Conc, T2) Meta-GWAS

| **meta-GWAS** | **total number of cows** | **total number of bulls** | **total number of individuals** |
| --- | --- | --- | --- |
| multi breed | 28,121 | 67,535 | 95,656 |
| Holstein | 3,279 | 42,499 | 45,778 |
| Jersey | 0 | 5,151 | 5,151 |
| Red | 23,186 | 5,151 | 28,337 |
| Brown | 631 | 4,979 | 5,610 |
| Dual purpose | 1,656 | 14,200 | 15,856 |
| Normande | 0 | 2,595 | 2,595 |

Supp Table 2q. Interval first to last insemination (Int1stLast, T4) individuals per organisation

| **organisation** | **breed** | **description** | **number of cows** | **number of bulls** | **breed category** |
| --- | --- | --- | --- | --- | --- |
| Aarhus University | Holstein | interval first to last insemination | 0 | 5,570 | Holstein |
| INIA | Holstein | interval first to last insemination | 0 | 3,435 | Holstein |
| Qualitas | Holstein | interval first to last insemination | 3,853 | 2,629 | Holstein |
| VIT | Holstein | interval first to last insemination | 0 | 13,106 | Holstein |
| WUR | Holstein | interval first to last insemination | 0 | 5,798 | Holstein |
| Aarhus University | Jersey | interval first to last insemination | 0 | 1,147 | Jersey |
| LUKE | Nordic Red | interval first to last insemination | 0 | 5,151 | Red |
| TUM | Brown Swiss | interval first to last insemination | 0 | 1,977 | Brown |
| ETH | Braunvieh | interval first to last insemination | 1,357 | 3,041 | Brown + Dual purpose |
| Qualitas | Swiss Fleckvieh | interval first to last insemination | 679 | 662 | Dual purpose |
| Qualitas | Simmental | interval first to last insemination | 489 | 716 | Dual purpose |
| TUM | Fleckvieh | interval first to last insemination | 0 | 6,821 | Dual purpose |
| total |  |  | 6,378 | 50,053 |  |

Supp Table 2r. Interval first to last insemination (Int1stLast, T4) Meta-GWAS

| **meta-GWAS** | **total number of cows** | **total number of bulls** | **total number of individuals** |
| --- | --- | --- | --- |
| multi breed | 6,378 | 50,053 | 56,431 |
| Holstein | 3,853 | 30,538 | 34,391 |
| Jersey | 0 | 1,147 | 1,147 |
| Red | 0 | 5,151 | 5,151 |
| Brown | 1,357 | 5,018 | 6,375 |
| Dual purpose | 2,525 | 11,240 | 13,765 |
| Normande | 0 | 0 | 0 |

Supp Table 2s. Calving interval (CalvInt, T5) individuals per organisation

| **organisation** | **breed** | **description** | **number of cows** | **number of bulls** | **breed category** |
| --- | --- | --- | --- | --- | --- |
| Agriculture Victoria | Holstein | calving interval | 41,734 | 5,631 | Holstein |
| INIA | Holstein | days open | 0 | 4,434 | Holstein |
| VIT | Holstein | calving interval | 0 | 13,104 | Holstein |
| WUR | Holstein | calving interval | 0 | 5,798 | Holstein |
| Agriculture Victoria | Jersey | calving interval | 8,688 | 1,369 | Jersey |
| Agriculture Victoria | Australian Red | calving interval | 2,973 | 0 | Red |
| total |  |  | 53,395 | 30,336 |  |

Supp Table 2t. Calving interval (CalvInt, T5) Meta-GWAS

| **meta-GWAS** | **total number of cows** | **total number of bulls** | **total number of individuals** |
| --- | --- | --- | --- |
| multi breed | 53,395 | 30,336 | 83,731 |
| Holstein | 41,734 | 28,967 | 70,701 |
| Jersey | 8,688 | 1,369 | 10,057 |
| Red | 2,973 | 0 | 2,973 |
| Brown | 0 | 0 | 0 |
| Dual purpose | 0 | 0 | 0 |
| Normande | 0 | 0 | 0 |

Supp Table 3c. Number of variants in production trait Meta-GWAS

| **trait** | **breeds** | **number of variants** |
| --- | --- | --- |
| MY | Multi-breed | 27828292 |
| MY | Holstein | 24754261 |
| MY | Jersey | 14493815 |
| MY | Red | 19137300 |
| MY | Brown | 18686530 |
| MY | Dual purpose | 22210447 |
| FY | Multi-breed | 27831555 |
| FY | Holstein | 24755298 |
| FY | Jersey | 14474434 |
| FY | Red | 19136186 |
| FY | Brown | 18686242 |
| FY | Dual purpose | 22248746 |
| PY | Multi-breed | 27833844 |
| PY | Holstein | 24749496 |
| PY | Jersey | 14480447 |
| PY | Red | 19135729 |
| PY | Brown | 18684161 |
| PY | Dual purpose | 22287082 |
| FC | Multi-breed | 27134733 |
| FC | Holstein | 23606367 |
| FC | Jersey | 14479811 |
| FC | Red | 19137855 |
| FC | Brown | 18683294 |
| FC | Dual purpose | 22234040 |
| PC | Multi-breed | 27108846 |
| PC | Holstein | 23606033 |
| PC | Jersey | 14487233 |
| PC | Red | 19137038 |
| PC | Brown | 18687807 |
| PC | Dual purpose | 22170059 |

Supp Table 3d. Number of variants in fertility trait Meta-GWAS

| **trait** | **breeds** | **number of variants** |
| --- | --- | --- |
| Hfert | Multi-breed | 23506755 |
| Hfert | Holstein | 19643330 |
| Hfert | Red | 14712499 |
| Hfert | Brown | 10016136 |
| Hfert | Dual purpose | 19035957 |
| CalvMate | Multi-breed | 25080074 |
| CalvMate | Holstein | 19701560 |
| CalvMate | Red | 14710619 |
| CalvMate | Brown | 18441276 |
| CalvMate | Dual purpose | 22078874 |
| Conc | Multi-breed | 25464174 |
| Conc | Holstein | 20134666 |
| Conc | Jersey | 12827710 |
| Conc | Red | 18286018 |
| Conc | Brown | 18180567 |
| Conc | Dual purpose | 21884870 |
| Int1stlast | Multi-breed | 24220133 |
| Int1stlast | Holstein | 20008981 |
| Int1stlast | Jersey | 12865537 |
| Int1stlast | Red | 17592807 |
| Int1stlast | Brown | 18230078 |
| Int1stlast | Dual purpose | 21085034 |
| CalvInt | Multi-breed | 21128097 |
| CalvInt | Holstein | 18903886 |
| CalvInt | Jersey | 13370038 |
| CalvInt | Red | 16691446 |

Supp Table 9a. Number of individuals (n) in GTEx for gene expression

| **tissue** | **n** |
| --- | --- |
| Adipose | 218 |
| Blood | 860 |
| Conceptus | 43 |
| Embryo | 407 |
| Hypothalamus | 117 |
| Ileum | 125 |
| Jejunum | 160 |
| Kidney | 47 |
| Leukocyte | 65 |
| Liver | 706 |
| Lung | 132 |
| Lymph_node | 100 |
| Macrophage | 350 |
| Mammary | 662 |
| Milk_cell | 209 |
| Monocytes | 209 |
| Muscle | 859 |
| Ovary | 223 |
| Oviduct | 111 |
| Pituitary | 149 |
| Rumen | 370 |
| Salivary_gland | 41 |
| Skin_fibroblast | 44 |
| Small_intestine | 43 |
| Spleen | 54 |
| Testis | 86 |
| Uterus | 452 |

Supp Table 9p. Number of individuals (n) in GTEx for gene splicing

| **tissue** | **n** |
| --- | --- |
| Adipose | 218 |
| Blood | 860 |
| Conceptus | 43 |
| Embryo | 407 |
| Hypothalamus | 117 |
| Ileum | 125 |
| Jejunum | 160 |
| Kidney | 47 |
| Leukocyte | 65 |
| Liver | 706 |
| Lung | 132 |
| Lymph_node | 100 |
| Macrophage | 350 |
| Mammary | 662 |
| Milk_cell | 209 |
| Monocytes | 209 |
| Muscle | 859 |
| Ovary | 223 |
| Oviduct | 111 |
| Pituitary | 149 |
| Rumen | 370 |
| Salivary_gland | 41 |
| Skin_fibroblast | 44 |
| Small_intestine | 43 |
| Spleen | 54 |
| Testis | 86 |
| Uterus | 452 |

**Table 10a to 10e. GTEx enrichment results**

Supp Table 10a. Summary of GTEx enrichment folds for gene expression QTL (geQTL) and gene splicing QTL (sQTL) for tissues with at least 100 samples, for validated Meta-GWAS variants associated with production and fertility.

|  |  | **Production** |  | **Fertility** |  |
| --- | --- | --- | --- | --- | --- |
| **tissue** | **nSamples** | **geQTL** | **sQTL** | **geQTL** | **sQTL** |
| Adipose | 218 | 10.9 | 8.3 | 0 | 1 |
| Blood | 860 | 8.4 | 8.9 | 2.8 | 2.5 |
| Embryo | 407 | 2.4 | 0.6 | 0 | 0 |
| Hypothalamus | 117 | 10.4 | 2.8 | 0 | 1.3 |
| Ileum | 125 | NA | 15.6 | NA | 3.9 |
| Intramuscular_fat | 174 | 4.9 | NA | 2.9 | NA |
| Jejunum | 160 | 3.5 | 12.9 | 0 | 0.9 |
| Liver | 706 | 7.8 | 11.6 | 3.3 | 3.7 |
| Lung | 132 | 8.4 | 13.1 | 0.2 | 2 |
| Lymph_node | 100 | 8.8 | 11.1 | 0.9 | 3.4 |
| Macrophage | 350 | 24.1 | 7 | 6.6 | 3.5 |
| Mammary | 662 | 24.1 | 15.4 | 3.4 | 4.7 |
| Milk_cell | 209 | 0.4 | 6.7 | 0 | 3.1 |
| Monocytes | 209 | 11.2 | 3.9 | 12.7 | 2.1 |
| Muscle | 859 | 7.7 | 8.6 | 1.5 | 3.7 |
| Ovary | 223 | 3.3 | 5.3 | 1 | 3.1 |
| Oviduct | 111 | 1.3 | 3.4 | 0 | 9.1 |
| Pituitary | 149 | 11.5 | 5.9 | 0 | 1.1 |
| Rumen | 370 | 2.5 | 13.4 | 0.3 | 1.4 |
| Uterus | 452 | 7.2 | 12.4 | 3.4 | 3.8 |

Supp Table 10b. GTEx enrichment folds for gene expression QTL and production QTL, where nALL is number of variants included in the Meta-GWAS, nAllGE is the number of variants associated with gene expression in cattle GTEx, percAllGE is nAllGE/nAll*100, nQTL is the number of variants in QTL regions, nQTL_GE is the number of variants in QTL regions associated with gene expression in cattle GTEx, percQTL_GE is nQTL_GE/nQTL*100, and emrichment is percQTL_GE/percAllGE.

| **tissue** | **nAll** | **nAllGE** | **percAllGE** | **nQTL** | **nQTL_GE** | **percQTL_GE** | **enrichment** |
| --- | --- | --- | --- | --- | --- | --- | --- |
| Adipose | 27862023 | 28664 | 0.102878 | 45585 | 513 | 1.12537 | 10.93888 |
| Blood | 27862023 | 257502 | 0.924204 | 45585 | 3542 | 7.7701 | 8.407343 |
| Embryo | 27862023 | 3089 | 0.011087 | 45585 | 12 | 0.026324 | 2.374391 |
| Hypothalamus | 27862023 | 9058 | 0.03251 | 45585 | 154 | 0.33783 | 10.39151 |
| Intramuscular_fat | 27862023 | 25128 | 0.090187 | 45585 | 203 | 0.445322 | 4.937746 |
| Jejunum | 27862023 | 19286 | 0.06922 | 45585 | 112 | 0.245695 | 3.549495 |
| Kidney | 27862023 | 5 | 1.79E-05 | 45585 | 0 | 0 | 0 |
| Leukocyte | 27862023 | 2076 | 0.007451 | 45585 | 93 | 0.204014 | 27.38075 |
| Liver | 27862023 | 143111 | 0.513642 | 45585 | 1836 | 4.02764 | 7.841337 |
| Lung | 27862023 | 16167 | 0.058025 | 45585 | 222 | 0.487002 | 8.39294 |
| Lymph_node | 27862023 | 33970 | 0.121922 | 45585 | 488 | 1.07053 | 8.78045 |
| Macrophage | 27862023 | 35722 | 0.12821 | 45585 | 1409 | 3.09093 | 24.10834 |
| Mammary | 27862023 | 51483 | 0.184778 | 45585 | 2028 | 4.44883 | 24.07662 |
| Milk_cell | 27862023 | 6457 | 0.023175 | 45585 | 4 | 0.008775 | 0.378635 |
| Monocytes | 27862023 | 19062 | 0.068416 | 45585 | 348 | 0.763409 | 11.15839 |
| Muscle | 27862023 | 89308 | 0.320537 | 45585 | 1129 | 2.47669 | 7.72669 |
| Ovary | 27862023 | 3672 | 0.013179 | 45585 | 20 | 0.043874 | 3.329041 |
| Oviduct | 27862023 | 5596 | 0.020085 | 45585 | 12 | 0.026324 | 1.310669 |
| Pituitary | 27862023 | 16456 | 0.059063 | 45585 | 310 | 0.680048 | 11.51404 |
| Rumen | 27862023 | 28030 | 0.100603 | 45585 | 115 | 0.252276 | 2.507639 |
| Spleen | 27862023 | 40 | 0.000144 | 45585 | 2 | 0.004387 | 30.56044 |
| Testis | 27862023 | 1511 | 0.005423 | 45585 | 0 | 0 | 0 |
| Uterus | 27862023 | 80805 | 0.290018 | 45585 | 957 | 2.09937 | 7.238758 |

Supp Table 10c. GTEx enrichment folds for gene expression QTL and fertility QTL, where nALL is number of variants included in the Meta-GWAS, nAllGE is the number of variants associated with gene expression in cattle GTEx, percAllGE is nAllGE/nAll*100, nQTL is the number of variants in QTL regions, nQTL_GE is the number of variants in QTL regions associated with gene expression in cattle GTEx, percQTL_GE is nQTL_GE/nQTL*100, and emrichment is percQTL_GE/percAllGE.

| **tissue** | **nAll** | **nAllGE** | **percAllGE** | **nQTL** | **nQTL_GE** | **percQTL_GE** | **enrichment** |
| --- | --- | --- | --- | --- | --- | --- | --- |
| Adipose | 27862023 | 28664 | 0.102878 | 7230 | 0 | 0 | 0 |
| Blood | 27862023 | 257502 | 0.924204 | 7230 | 190 | 2.62794 | 2.843463 |
| Embryo | 27862023 | 3089 | 0.011087 | 7230 | 0 | 0 | 0 |
| Hypothalamus | 27862023 | 9058 | 0.03251 | 7230 | 0 | 0 | 0 |
| Intramuscular_fat | 27862023 | 25128 | 0.090187 | 7230 | 19 | 0.262794 | 2.913869 |
| Jejunum | 27862023 | 19286 | 0.06922 | 7230 | 0 | 0 | 0 |
| Kidney | 27862023 | 5 | 1.79E-05 | 7230 | 0 | 0 | 0 |
| Leukocyte | 27862023 | 2076 | 0.007451 | 7230 | 11 | 0.152144 | 20.41927 |
| Liver | 27862023 | 143111 | 0.513642 | 7230 | 121 | 1.67358 | 3.258262 |
| Lung | 27862023 | 16167 | 0.058025 | 7230 | 1 | 0.013831 | 0.238367 |
| Lymph_node | 27862023 | 33970 | 0.121922 | 7230 | 8 | 0.11065 | 0.907547 |
| Macrophage | 27862023 | 35722 | 0.12821 | 7230 | 61 | 0.843707 | 6.580665 |
| Mammary | 27862023 | 51483 | 0.184778 | 7230 | 46 | 0.636238 | 3.443256 |
| Milk_cell | 27862023 | 6457 | 0.023175 | 7230 | 0 | 0 | 0 |
| Monocytes | 27862023 | 19062 | 0.068416 | 7230 | 63 | 0.871369 | 12.73639 |
| Muscle | 27862023 | 89308 | 0.320537 | 7230 | 35 | 0.484094 | 1.510259 |
| Ovary | 27862023 | 3672 | 0.013179 | 7230 | 1 | 0.013831 | 1.049479 |
| Oviduct | 27862023 | 5596 | 0.020085 | 7230 | 0 | 0 | 0 |
| Pituitary | 27862023 | 16456 | 0.059063 | 7230 | 0 | 0 | 0 |
| Rumen | 27862023 | 28030 | 0.100603 | 7230 | 2 | 0.027663 | 0.274967 |
| Spleen | 27862023 | 40 | 0.000144 | 7230 | 0 | 0 | 0 |
| Testis | 27862023 | 1511 | 0.005423 | 7230 | 0 | 0 | 0 |
| Uterus | 27862023 | 80805 | 0.290018 | 7230 | 71 | 0.982019 | 3.386062 |

Supp Table 10d. GTEx enrichment folds for gene splice QTL and production QTL, where nALL is number of variants included in the Meta-GWAS, nAllSplice is the number of variants associated with gene splicing in cattle GTEx, percAllSplice is nAllGE/nAll*100, nQTL is the number of variants in QTL regions, nQTL_Splice is the number of variants in QTL regions associated with gene splicing in cattle GTEx, percQTL_Splicing is nQTL_Splice/nQTL*100, and emrichment is percQTL_Splice/percAllSplice.

| **tissue** | **nAll** | **nAllSplice** | **percAllSplice** | **nQTL** | **nQTL_Splice** | **percQTL_Splice** | **enrichment** |
| --- | --- | --- | --- | --- | --- | --- | --- |
| Adipose | 27862023 | 80136 | 0.287617 | 45585 | 1090 | 2.39114 | 8.313625 |
| Blood | 27862023 | 452753 | 1.62498 | 45585 | 6601 | 14.4806 | 8.911248 |
| Conceptus | 27862023 | 23 | 8.25E-05 | 45585 | 0 | 0 | 0 |
| Embryo | 27862023 | 1059 | 0.003801 | 45585 | 1 | 0.002194 | 0.577157 |
| Hypothalamus | 27862023 | 14977 | 0.053754 | 45585 | 69 | 0.151366 | 2.815892 |
| Ileum | 27862023 | 2974 | 0.010674 | 45585 | 76 | 0.166722 | 15.61945 |
| Jejunum | 27862023 | 35399 | 0.127051 | 45585 | 750 | 1.64528 | 12.94976 |
| Kidney | 27862023 | 9499 | 0.034093 | 45585 | 21 | 0.046068 | 1.351239 |
| Leukocyte | 27862023 | 2619 | 0.0094 | 45585 | 11 | 0.024131 | 2.567126 |
| Liver | 27862023 | 192276 | 0.690101 | 45585 | 3651 | 8.00921 | 11.60585 |
| Lung | 27862023 | 49467 | 0.177543 | 45585 | 1057 | 2.31875 | 13.06022 |
| Lymph_node | 27862023 | 58360 | 0.209461 | 45585 | 1064 | 2.3341 | 11.14336 |
| Macrophage | 27862023 | 77307 | 0.277464 | 45585 | 880 | 1.93046 | 6.957515 |
| Mammary | 27862023 | 133836 | 0.480353 | 45585 | 3374 | 7.40156 | 15.40858 |
| Milk_cell | 27862023 | 29512 | 0.105922 | 45585 | 324 | 0.71076 | 6.710221 |
| Monocytes | 27862023 | 30735 | 0.110311 | 45585 | 194 | 0.425579 | 3.857992 |
| Muscle | 27862023 | 142175 | 0.510282 | 45585 | 2004 | 4.39618 | 8.615197 |
| Ovary | 27862023 | 18469 | 0.066287 | 45585 | 161 | 0.353186 | 5.328102 |
| Oviduct | 27862023 | 19543 | 0.070142 | 45585 | 110 | 0.241307 | 3.440259 |
| Pituitary | 27862023 | 28251 | 0.101396 | 45585 | 273 | 0.598881 | 5.906357 |
| Rumen | 27862023 | 50799 | 0.182323 | 45585 | 1110 | 2.43501 | 13.35547 |
| Salivary_gland | 27862023 | 574 | 0.00206 | 45585 | 64 | 0.140397 | 68.14892 |
| Skin_fibroblast | 27862023 | 1467 | 0.005265 | 45585 | 165 | 0.361961 | 68.74552 |
| Small_intestine | 27862023 | 519 | 0.001863 | 45585 | 16 | 0.035099 | 18.84273 |
| Spleen | 27862023 | 1897 | 0.006809 | 45585 | 16 | 0.035099 | 5.15518 |
| Testis | 27862023 | 7309 | 0.026233 | 45585 | 20 | 0.043874 | 1.67249 |
| Uterus | 27862023 | 142560 | 0.511664 | 45585 | 2898 | 6.35735 | 12.42485 |

Supp Table 10e. GTEx enrichment folds for gene splice QTL and fertility QTL, where nALL is number of variants included in the Meta-GWAS, nAllSplice is the number of variants associated with gene splicing in cattle GTEx, percAllSplice is nAllGE/nAll*100, nQTL is the number of variants in QTL regions, nQTL_Splice is the number of variants in QTL regions associated with gene splicing in cattle GTEx, percQTL_Splicing is nQTL_Splice/nQTL*100, and emrichment is percQTL_Splice/percAllSplice

| **tissue** | **nAll** | **nAllSplice** | **percAllSplice** | **nQTL** | **nQTL_Splice** | **percQTL_Splice** | **enrichment** |
| --- | --- | --- | --- | --- | --- | --- | --- |
| Adipose | 27862023 | 80136 | 0.287617 | 7230 | 20 | 0.276625 | 0.961783 |
| Blood | 27862023 | 452753 | 1.62498 | 7230 | 292 | 4.03873 | 2.485403 |
| Conceptus | 27862023 | 23 | 8.25E-05 | 7230 | 0 | 0 | 0 |
| Embryo | 27862023 | 1059 | 0.003801 | 7230 | 0 | 0 | 0 |
| Hypothalamus | 27862023 | 14977 | 0.053754 | 7230 | 5 | 0.069156 | 1.286528 |
| Ileum | 27862023 | 2974 | 0.010674 | 7230 | 3 | 0.041494 | 3.887371 |
| Jejunum | 27862023 | 35399 | 0.127051 | 7230 | 8 | 0.11065 | 0.87091 |
| Kidney | 27862023 | 9499 | 0.034093 | 7230 | 3 | 0.041494 | 1.217077 |
| Leukocyte | 27862023 | 2619 | 0.0094 | 7230 | 2 | 0.027663 | 2.942854 |
| Liver | 27862023 | 192276 | 0.690101 | 7230 | 186 | 2.57261 | 3.727875 |
| Lung | 27862023 | 49467 | 0.177543 | 7230 | 26 | 0.359613 | 2.025498 |
| Lymph_node | 27862023 | 58360 | 0.209461 | 7230 | 52 | 0.719225 | 3.433694 |
| Macrophage | 27862023 | 77307 | 0.277464 | 7230 | 70 | 0.968188 | 3.489418 |
| Mammary | 27862023 | 133836 | 0.480353 | 7230 | 164 | 2.26833 | 4.722215 |
| Milk_cell | 27862023 | 29512 | 0.105922 | 7230 | 24 | 0.33195 | 3.13391 |
| Monocytes | 27862023 | 30735 | 0.110311 | 7230 | 17 | 0.235131 | 2.131528 |
| Muscle | 27862023 | 142175 | 0.510282 | 7230 | 136 | 1.88105 | 3.686295 |
| Ovary | 27862023 | 18469 | 0.066287 | 7230 | 15 | 0.207469 | 3.129841 |
| Oviduct | 27862023 | 19543 | 0.070142 | 7230 | 46 | 0.636238 | 9.070701 |
| Pituitary | 27862023 | 28251 | 0.101396 | 7230 | 8 | 0.11065 | 1.091266 |
| Rumen | 27862023 | 50799 | 0.182323 | 7230 | 18 | 0.248963 | 1.365505 |
| Salivary_gland | 27862023 | 574 | 0.00206 | 7230 | 0 | 0 | 0 |
| Skin_fibroblast | 27862023 | 1467 | 0.005265 | 7230 | 0 | 0 | 0 |
| Small_intestine | 27862023 | 519 | 0.001863 | 7230 | 1 | 0.013831 | 7.425205 |
| Spleen | 27862023 | 1897 | 0.006809 | 7230 | 0 | 0 | 0 |
| Testis | 27862023 | 7309 | 0.026233 | 7230 | 0 | 0 | 0 |
| Uterus | 27862023 | 142560 | 0.511664 | 7230 | 142 | 1.96404 | 3.838535 |

Supp Table 13a. Synergistic and antagonistic QTL regions identified, where raits: MY = milk yield, FY = fat yield, PY = protein yield, FC = fat content, PC = protein content, Hfert = heifer fertility, CalvMate = interval calving to first mating, Conc = conception rate, Int1stLast = interval first to last mating, CalvInt = calving interval, and nVariants = number of variants in QTL.

| **Chromosome** | **Start (bp)** | **End (bp)** | **nVariants** | **traits** |
| --- | --- | --- | --- | --- |
| *Synergistic regions* |  |
| 11 | 103,245,794 | 103,277,147 | 166 | MY, FY, PY, FC, CalvInt |
| 18 | 57,623,004 | 57,869,043 | 54 | PY, FP, PP, Conc, Int1stLast, CalvInt |
| 18 | 59,259,659 | 60,135,139 | 14 | PY, FP, Conc, Int1stLast |
| 25 | 35,714,320 | 35,869,073 | 3 | MY, Conc |
| *Antagonistic regions* |  |
| 5 | 89,554,484 | 90,035,542 | 162 | MY, PY, CalvInt |
| 5 | 105,594,077 | 105,790,990 | 4 | MY, Conc, CalvInt |
| 6 | 82,955,902 | 82,955,902 | 1 | PY, CalvInt |
| 6 | 87,675,298 | 87,919,948 | 440 | MY, CalvMate, Int1stLast, CalvInt |
| 6 | 89,593,824 | 89,616,728 | 4 | MY, CalvMate, CalvInt |
| 9 | 88,676,804 | 88,779,951 | 46 | MY, PY, CalvMate |
| 13 | 41,720,721 | 41,720,721 | 1 | MY , CalvMate |
| 13 | 53,788,810 | 54,595,332 | 30 | MY, PY, CalvMate, Int1stLast, CalvInt |
| 14 | 497,507 | 553,130 | 25 | MY, FY, FC, PC, CalvMate |
| 14 | 18,985,490 | 18,985,490 | 1 | MY, CalvMate |
| 20 | 33,792,019 | 34,169,770 | 5 | MY, PP, Int1stLast, CalvInt |
| 23 | 50,004,276 | 50,004,276 | 1 | MY, CalvInt |
| 23 | 51,214,759 | 51,236,078 | 3 | MY, PC, CalvInt |

Supp Table 13b. Correlations of SNP z-scores for all trait pairs

| trait | MY | FY | PY | FC | PC | Hfert | CalvMate | Conc | Int1stLast | CalvInt |
| --- | --- | --- | --- | --- | --- | --- | --- | --- | --- | --- |
| MY |  | 0 | 0 | 0 | 0 | 0 | 0 | 0 | 0 | 0 |
| FY | 0.36 |  | 0.00 | 0.00 | 0.00 | 0.00 | 0.00 | 0.00 | 0.00 | 0.00 |
| PY | 0.74 | 0.62 |  | 0.00 | 0.00 | 0.00 | 0.00 | 0.00 | 0.00 | 0.00 |
| FC | -0.53 | 0.49 | -0.14 |  | 0.00 | 0.00 | 0.00 | 0.00 | 0.00 | 0.00 |
| PC | -0.51 | 0.18 | 0.09 | 0.66 |  | 0.00 | 0.00 | 0.00 | 0.00 | 0.00 |
| Hfert | -0.01 | -0.04 | -0.03 | -0.02 | -0.02 |  | 0.00 | 0.00 | 0.00 | 0.00 |
| CalvMate | -0.17 | -0.13 | -0.15 | 0.01 | 0.04 | 0.02 |  | 0.00 | 0.00 | 0.00 |
| Conc | -0.07 | -0.08 | -0.08 | -0.01 | 0.00 | 0.42 | 0.02 |  | 0.00 | 0.00 |
| Int1stLast | -0.20 | -0.17 | -0.19 | 0.02 | 0.05 | 0.35 | 0.33 | 0.61 |  | 0.00 |
| CalvInt | -0.21 | -0.19 | -0.20 | 0.00 | 0.05 | 0.20 | 0.46 | 0.32 | 0.57 |  |

Supp Table 14a. Number of animals in each birthyear cohort used for allele frequency estimation

|  | **Australian Holstein** | | **Australian Jersey** | | **Irish Holstein** | | **German Holstein** | |
| --- | --- | --- | --- | --- | --- | --- | --- | --- |
| **birthyears** | **bulls** | **cows** | **bulls** | **cows** | **bulls** | **cows** | | **bulls** | |
| 1981-1985 | 157 | 0 | 58 | 0 | 245 | 16 | | 34 | |
| 1986-1990 | 220 | 1 | 52 | 0 | 458 | 0 | | 265 | |
| 1991-1995 | 446 | 167 | 71 | 3 | 995 | 1 | | 571 | |
| 1996-2000 | 880 | 1,651 | 142 | 249 | 1,893 | 19 | | 1,895 | |
| 2001-2005 | 718 | 6,115 | 115 | 2,316 | 1,898 | 128 | | 4,456 | |
| 2006-2010 | 504 | 13,049 | 104 | 3,683 | 1,915 | 2,824 | | 4,097 | |
| 2011-2015 | 505 | 25,386 | 77 | 3,254 | 13,247 | 9,445 | | 2,250 | |
| 2016-2020 | 150 | 18,254 | 23 | 2,723 | 4,626 | 1,559 | | 0 | |

Supp Table 14b. Allele frequencies for QTL in different classes across traits, where onlyProd/Fert are variants in QTL regions that were only associated with production or only fertility, synergistic are variants in QTL regions that had a favourable correlation between MY, PY and fertility, and antagonistic are variants in QTL regions that had a unfavourable correlation between MY, PY and fertility.

| **trait** | **onlyProd/Fert** | **synergistic** | **antagonistic** |
| --- | --- | --- | --- |
| MY | 0.02 | 0.23 | -0.01 |
| PY | 0.05 | 0.2 | -0.01 |
| Hfert | 0 | 0.15 | -0.05 |
| CalvMate | 0.01 | 0.15 | 0.01 |
| Conc | 0.01 | 0.08 | -0.2 |
| Int1stLast | 0 | 0.13 | 0.01 |
| CalvInt | 0.01 | 0.21 | 0.01 |

Supp Table 15a. Average QTL size (avgSize) in basepairs (bp) in within-breed (WB) and multi-breed (MB) Meta-GWAS averaged across production and fertility traits.

| **traits** | **analysis** | **avgSize (bp)** | **avgVariants** |
| --- | --- | --- | --- |
| Production | MB | 199,463 | 30 |
| Production | WB | 223,769 | 39 |
| Fertility | MB | 243,434 | 27 |
| Fertility | WB | 258,540 | 40 |

Supp Table 15b. Average QTL size (avgSize) in basepairs (bp) per category (only production, only fertility, synergistic & antagonistic); size of original QTL region, so including non-overlapping variants

| **Category** | **avgSize (bp)** | **avgVariants** |
| --- | --- | --- |
| onlyProd | 239,665 | 32 |
| onlyFert | 239,173 | 33 |
| Synergistic | 304,771 | 47 |
| Antagonistic | 319,807 | 97 |

Supp Table 18a. QTL regions for the 5 fertility traits overlapping with genes associated with heat (estrous) scores

| Chr | Start | End | LogP_leadSNP | #SNP | Gene | Trait |
| --- | --- | --- | --- | --- | --- | --- |
| 5 | 55459624 | 56291220 | 9.159204 | 6 | *AVIL* | CalvInt |
| 5 | 91081388 | 91533774 | 8.923724 | 82 | *PIK3C2G* | CalvInt |
| 5 | 91724082 | 91883965 | 7.698753 | 3 | *PIK3C2G* | CalvInt |
| 5 | 112427104 | 112449412 | 9.66274 | 6 | *ZC3H7B* | Conc |
| 6 | 97621103 | 98090202 | 8.945004 | 5 | *LIN54* | HFert |
| 8 | 96447959 | 96631094 | 9.029839 | 5 | *ZNF462* | Conc |
| 10 | 76278428 | 76502072 | 10.22214 | 167 | *SYNE2* | InHFertstLast |
| 10 | 76252591 | 76740664 | 9.699839 | 89 | *SYNE2* | CalvInt |
| 10 | 76252591 | 76740664 | 9.699839 | 89 | *AKAP5* | CalvInt |
| 10 | 76404109 | 76687127 | 13.61332 | 241 | *AKAP5* | CalvMate |
| 11 | 86110231 | 86276205 | 8.690157 | 2 | *LPIN1* | CalvMate |
| 11 | 105494506 | 106038560 | 8.9859 | 37 | *PTGDS* | Conc |
| 13 | 56769736 | 57228262 | 14.27778 | 72 | *EDN3* | CalvMate |
| 13 | 56946554 | 57451653 | 8.952336 | 66 | *EDN3* | CalvInt |
| 15 | 76536678 | 77033634 | 11.91364 | 30 | *HARBI1* | CalvInt |
| 18 | 49703979 | 50143072 | 15.61261 | 8 | *PLD3* | CalvMate |
| 18 | 49703979 | 50143072 | 15.61261 | 8 | *SPTBN4* | CalvMate |
| 18 | 49703979 | 50143072 | 15.61261 | 8 | *SNRPA* | CalvMate |
| 18 | 49653576 | 50003156 | 10.07294 | 16 | *PLD3* | CalvInt |
| 18 | 49653576 | 50003156 | 10.07294 | 16 | *SPTBN4* | CalvInt |
| 18 | 55905257 | 55990514 | 10.22643 | 31 | *SLC17A7* | CalvInt |
| 18 | 56499635 | 56641083 | 22.98338 | 10 | *FAM71E1* | CalvInt |
| 18 | 56486383 | 56731417 | 15.07753 | 11 | *FAM71E1* | InHFertstLast |
| 18 | 56480087 | 56641083 | 10.89143 | 6 | *FAM71E1* | Conc |
| 18 | 61030145 | 61916452 | 15.2505 | 55 | *CACNG6* | Conc |
| 18 | 61058529 | 61704456 | 10.694 | 26 | *CACNG6* | InHFertstLast |
| 18 | 62828960 | 63579239 | 12.83209 | 51 | *ZNF787* | InHFertstLast |
| 18 | 62828960 | 63695848 | 13.0118 | 112 | *ZNF787* | CalvInt |
| 18 | 63373315 | 63856358 | 9.931072 | 57 | *ZNF787* | Conc |
| 19 | 28172608 | 28773117 | 13.7716 | 54 | *MYH10* | Conc |
| 19 | 27833089 | 28798766 | 10.38195 | 151 | *MYH10* | CalvInt |
| 19 | 34539271 | 34688814 | 8.013945 | 10 | *TOM1L2* | HFert |
| 19 | 50936238 | 51171397 | 10.27507 | 2 | *CCDC137* | HFert |
| 19 | 55613419 | 55897491 | 8.113453 | 4 | *EVPL* | CalvInt |
| 21 | 54269659 | 55092207 | 51.04053 | 13 | *KLHL28* | CalvMate |
| 21 | 54269659 | 55092207 | 51.04053 | 13 | *FANCM* | CalvMate |
| 21 | 54518908 | 55092368 | 29.37882 | 8 | *KLHL28* | CalvInt |
| 21 | 54518908 | 55092368 | 29.37882 | 8 | *FANCM* | CalvInt |
| 21 | 54205960 | 55092270 | 16.57659 | 68 | *KLHL28* | InHFertstLast |
| 21 | 54205960 | 55092270 | 16.57659 | 68 | *FANCM* | InHFertstLast |
| 21 | 58255867 | 58912884 | 15.82507 | 15 | *OTUB2* | CalvInt |
| 23 | 9685892 | 9716619 | 7.611899 | 5 | *FKBP5* | CalvInt |
| 25 | 35386378 | 35977019 | 13.09539 | 316 | *ACHE* | Conc |
| 25 | 40468014 | 41383389 | 14.66075 | 18 | *GNA12* | Conc |
| 26 | 6566177 | 7402159 | 10.87419 | 218 | *DKK1* | CalvMate |
| 26 | 6568257 | 7071287 | 16.07094 | 4 | *DKK1* | CalvInt |

Supp Table 18b. QTL regions for the 5 fertility traits overlapping with prioritised candidate genes based on protein-protein interactions, gene expression, and text-mining, where Am=Amygdala, DH=dorsal hypothalamus, VH=ventral hypothalamus, HC=hippocampus, Pit=Pituitary

| chr | start | end | logP | #SNP | gene | trait | Am | DH | VH | HC | Pit |
| --- | --- | --- | --- | --- | --- | --- | --- | --- | --- | --- | --- |
| 5 | 55459624 | 56291220 | 9.16 | 6 | *INHBE* | CalvInt |  |  |  |  | 1 |
| 5 | 57014191 | 57543765 | 9.55 | 9 | *PAN2* | CalvMate | 1 |  |  |  |  |
| 5 | 106587374 | 107440277 | 10.1 | 78 | *FKBP4* | CalvInt |  |  |  |  | 1 |
| 10 | 61553838 | 61896315 | 7.69 | 4 | *FBN1* | Conc |  |  | 1 |  |  |
| 10 | 76278428 | 76502072 | 10.22 | 167 | *ESR2* | Int1stLast |  | 1 |  |  |  |
| 10 | 76252591 | 76740664 | 9.7 | 89 | *ESR2* | CalvInt |  | 1 |  |  |  |
| 10 | 76404109 | 76687127 | 13.61 | 241 | *ESR2* | CalvMate |  | 1 |  |  |  |
| 10 | 88247123 | 88912823 | 8.29 | 11 | *POMT2* | Conc |  |  | 1 |  |  |
| 11 | 86110231 | 86276205 | 8.69 | 2 | *GREB1* | CalvMate | 1 | 1 |  |  |  |
| 11 | 103245609 | 103277147 | 9.61 | 167 | *PAEP* | CalvInt |  | 1 |  | 1 |  |
| 14 | 398877 | 1077529 | 10.74 | 267 | *EXOSC4* | CalvMate |  |  |  | 1 |  |
| 14 | 398877 | 1077529 | 10.74 | 267 | *SLC39A4* | CalvMate |  | 1 |  |  |  |
| 15 | 76536678 | 77033634 | 11.91 | 30 | *F2* | CalvInt |  |  |  | 1 |  |
| 17 | 68897760 | 69604425 | 10.79 | 68 | *LIF* | CalvInt |  |  | 1 |  |  |
| 17 | 69242369 | 69352822 | 14.83 | 41 | *LIF* | Int1stLast |  |  | 1 |  |  |
| 17 | 69227272 | 69332817 | 9.71 | 9 | *LIF* | Conc |  |  | 1 |  |  |
| 17 | 68938667 | 69371436 | 16.88 | 77 | *LIF* | CalvMate |  |  | 1 |  |  |
| 18 | 49703979 | 50143072 | 15.61 | 8 | *SPTBN4* | CalvMate | 1 |  |  |  |  |
| 18 | 49653576 | 50003156 | 10.07 | 16 | *SPTBN4* | CalvInt | 1 |  |  |  |  |
| 18 | 50327487 | 50774959 | 12 | 8 | *TGFB1* | CalvMate |  |  | 1 | 1 |  |
| 18 | 50111526 | 50868709 | 11.41 | 6 | *TGFB1* | CalvInt |  |  | 1 | 1 |  |
| 18 | 50866625 | 51368688 | 11.3 | 71 | *DEDD2* | CalvMate |  | 1 |  |  |  |
| 18 | 55358669 | 55619841 | 14.88 | 45 | *GYS1* | CalvInt | 1 |  |  | 1 |  |
| 18 | 55905257 | 55990514 | 10.23 | 31 | *NOSIP* | CalvInt |  |  |  | 1 |  |
| 19 | 26978109 | 27626799 | 13.41 | 27 | *SLC2A4* | Conc | 1 |  |  |  |  |
| 25 | 26609083 | 27075599 | 8.28 | 7 | *CTF1* | CalvMate | 1 |  |  |  |  |
| 25 | 35386378 | 35977019 | 13.1 | 316 | *TFR2* | Conc | 1 |  |  |  |  |
| 25 | 35854564 | 35985729 | 11.08 | 37 | *TFR2* | Int1stLast | 1 |  |  |  |  |

Supp Table 20a. GATK truth and training sets 1000 Bull Genomes Run7 and 8.

| **Name** | **Filters** | **Known** | **Training** | **Truth** | **Prior** |
| --- | --- | --- | --- | --- | --- |
| **(number variants)** |
| Run7-TauInd-SNP-truth.vcf (9,914,679) | Based on results from Run7 Taurus and Indicus animals processed using GATK’s genotypeGVCFs tool and filtered using the traditional 1kbulls filtering thresholds (pre-Beagle correction) (ref original 1kbulls paper). | FALSE | TRUE | TRUE | 12 |
| Additionally: |
| - MAF between 0.05 and 0.5 |
| - At least 10 ALT homozygotes |
| - No flanking variants +/- 10bp |
| - No HWE p-value threshold |
| - Opposing homozygotes < 0.014 |
| Run7-TauInd-SNP-training.vcf | Based on results from Run7 Taurus and Indicus animals processed using GATK’s genotypeGVCFs tool and filtered using the traditional 1kbulls filtering thresholds (pre-Beagle correction) (ref original 1kbulls paper). | FALSE | TRUE | FALSE | 10 |
| -3,758,189 | As above but relaxed filters: |
|  | - MAF between 0.05 and 0.5 |
|  | - At least 5 ALT homozygotes |
|  | - No flanking variants +/- 10bp |
|  | - No HWE p-value threshold |
|  | - Opposing homozygotes < 0.10 |
|  | - Mutually exclusive to SNP above |
| Affy_truth.vcf | Comprised of filtered variants from the Affymetrix pre-screening array prior to the building of the 600k Affymetrix Bos-1 array. Selecting only variants with the frequency of “A” allele between 0.1-0.9. Converted to new reference using University of Missouri’s ARS1.2 liftover files. | FALSE | TRUE | TRUE | 12 |
| -323,782 |
| GGPF250_truth.vcf | Comprised of filtered variants from The University of Missouri based on 18,000 genotyped animals. Converted to new reference using University of Missouri’s ARS1.2 liftover files. | FALSE | TRUE | TRUE | 15 |
| -89,705 |
| HD_truth.vcf | Using our HD data. Iona’s SNP that overlap with Run6. Converted to new reference using University of Missouri’s ARS1.2 liftover files. | FALSE | TRUE | TRUE | 15 |
| -581,468 |

* INDEL truth/training sets were the same as 1 and 2 above with 855,378 (Run7-TauInd-INDEL-truth.vcf) and 349,687 (Run7-TauInd-INDEL-training.vcf) INDELs respectively

Supp Table 20b. GATK tranche information for SNP

| **Tranche** | **Ti/Tv** | **Column 7 key** |
| --- | --- | --- |
| 90 | 2.447 | PASS |
| 99 | 2.3293 | VQSRTrancheSNP90.00to99.00 |
| 99.9 | 2.3752 | VQSRTrancheSNP99.00to99.90 |
| 100 | 2.2642 | VQSRTrancheSNP99.90to100.00 |

Supp Table 20c. GATK tranche information for INDEL

| **Tranche** | **Ti/Tv** | **Column 7 key** |
| --- | --- | --- |
| 90 | NA | PASS |
| 99 | NA | VQSRTrancheINDEL90.00to99.00 |
| 99.9 | NA | VQSRTrancheINDEL99.00to99.90 |
| 100 | NA | VQSRTrancheINDEL99.90to100.00 |

Supp Table 21. Imputation software used by each collaborator

| **Collaborator** | **Imputation software** | **1000 Bull Genomes Reference** | **Breed-specific Reference** |
| --- | --- | --- | --- |
| Aarhus University | Minimac4 | Run7 | Multi-Breed |
| Agriculture Victoria | Minimac3 | Run7 | Multi-Breed |
| ETH | Beagle5.1 | Run7 | 372 BSW samples |
| GENO | Minimac4 | Run8 | Multi-Breed |
| Kiel University | Beagle5 | Run7 | Multi-Breed |
| INIA | Minimac4 | Run7 | Multi-Breed |
| INRAE | Minimac4 | Run8 | Multi-Breed |
| Qualitas | Minimac3 | Run7 | Multi-Breed |
| Technical University Munich | Beagle5.1 | Run7 | Multi-Breed |
| Wageningen University and Research Center | Beagle5.1 | Run7 | Multi-Breed |
| VIT | Beagle5 | Run7 | Multi-Breed |
| TEAGASC | Minimac3 | Run7 | Multi-Breed |

Supp Table 22a. Averaged overlap across traits between QTL regions between breeds. Overlap is measured by the percentage of QTL detected in one breed with at least one variant in a QTL region detected in a second breed (%Shared), the percentage of QTL detected in one breed with at least one variant significant in a second breed (%Sign), the percentage of variants in a QTL region detected in one breed with the same direction of effect in a second breed (%Dir).

|  |  | QTL detected in breed1 | | | | QTL detected in breed2 | | | |
| --- | --- | --- | --- | --- | --- | --- | --- | --- | --- |
| Breed1 | Breed2 | nQTL | %Shared | %Sign | %Dir | nQTL | %Shared | %Sign | %Dir |
| HOL | BROWN | 359 | 4.3 | 6.4 | 60 | 79 | 13.5 | 26.7 | 57.2 |
| HOL | DUAL | 402 | 4.6 | 6.2 | 68.8 | 82 | 21.2 | 32 | 78.3 |
| HOL | JER | 333 | 2.4 | 4 | 69 | 39 | 22.6 | 53.8 | 68.6 |
| HOL | RDC | 380 | 4.1 | 5.8 | 76.4 | 60 | 20.8 | 32.4 | 80.9 |
| JER | BROWN | 38 | 15.1 | 22.8 | 60.6 | 73 | 7.3 | 11.5 | 61.4 |
| JER | DUAL | 38 | 18.2 | 24.4 | 63.4 | 67 | 8.3 | 11.6 | 78.3 |
| JER | RDC | 38 | 12.8 | 18.3 | 63.5 | 47 | 9.6 | 13.6 | 79.4 |
| RDC | BROWN | 48 | 12.8 | 20.1 | 78.2 | 76 | 8.3 | 11.3 | 71.1 |
| RDC | DUAL | 54 | 16.6 | 22 | 79.1 | 76 | 10.5 | 12.5 | 85.3 |

Supp Table 22b. Genomic regions that contained variants in QTL regions that were detected for the same trait(s) in all five independent breed groups (HOL, JER, RDC, BROWN, and DUAL).

| **Trait** | **Chr** | **Start (bp)** | **End (bp)** | **nVariants** |
| --- | --- | --- | --- | --- |
| FC | 3 | 15,464,742 | 15,495,684 | 4 |
| PC | 3 | 15,464,742 | 15,495,684 | 6 |
| PY | 6 | 85,438,110 | 85,454,960 | 5 |
| PC | 10 | 46,384,772 | 46,544,085 | 149 |
| FC | 11 | 103,245,794 | 103,277,147 | 60 |
| PC | 11 | 104,173,054 | 104,184,960 | 95 |
| FC | 20 | 31,888,449 | 31,888,449 | 1 |
| PC | 20 | 31,888,449 | 31,888,449 | 1 |
| MY | 20 | 31,888,449 | 31,888,449 | 1 |
| FC | 27 | 36,466,414 | 36,537,488 | 22 |
