# Supplementary material for: Genome-wide meta-analyses in 708,480 individuals shed light on the genetic conflict between productivity and fertility in dairy cattle
Source: Research Square preprint supplement (doi:10.21203/rs.3.rs-8631217/v1), 2026-02-13
Supplement: Supplementary file 2 [file f1cf72a0e4bfe299871a24d1.xlsx]

## Sheet: SuppTable1-ImpRefPop
Supp Table 1. 1000 Bull Genomes imputation reference population animals from Run 7 and Run 8.
BreedGroup	Number of Animals Run7	Mean Coverage Run7	Number of Animals Run8	Mean Coverage Run8
Abondance	9	9.81778	9	9.81778
Alentejana	1	25.11	1	27.5429
Angus	300	12.8169	303	12.8457
AngusRed	34	9.34132	35	9.30957
Aubrac	9	8.03444	9	8.03444
Aurochs	0	NA	1	7.58
AustralianLowline	0	NA	1	25.7
BeefCross	10	5.42839	55	10.2243
BeefDairyCross	42	14.487	46	12.145
BelgianBlue	9	9.06961	10	9.87865
BeltedCattle	0	NA	1	11.0342
BlondedAquitaine	41	11.4263	41	11.4263
Bohuskulla	0	NA	3	14.5433
Boskarin	1	NA	1	NA
Braunvieh	56	13.5066	87	11.4842
BrownSwiss	134	13.0339	251	13.4223
Busa	0	NA	10	15.726
Cabannina	1	NA	2	10.13
Charolais	144	10.9784	147	11.0225
Chianina	8	11.2349	9	13.079
Dabieshan	4	9.53492	0	NA
Corriente	0	NA	4	11.0295
CostenoConCuernos	0	NA	2	4.32581
DairyCross	10	10.947	63	15.6797
DeutschesSchwarzbuntesNiederungsrind	0	NA	57	11.526
Devon	1	10.3906	1	10.3906
Dexter	2	12.89	2	12.89
DutchBelted	0	NA	1	11.4857
DutchDeepRedCattle	0	NA	1	12.1515
DutchImprovedRedandWhiteBeef	0	NA	1	10.6676
EasternFinncattle	0	NA	5	13.208
Eringer	0	NA	3	16.7678
Evolè	0	NA	2	18.58
FinnishAyrshire	32	8.72844	33	8.65758
Fjäll	0	NA	11	20.6809
FleckviehSimmental	284	9.50174	315	10.2518
Friesian	31	11.2294	1	13.7203
Galloway	2	12.91	4	11.1339
Gelbvieh	59	12.2389	54	12.3
GermanRedAngler	6	10.635	6	10.635
GroningerWhiteHeaded	0	NA	1	12.9905
Guernsey	20	11.44	20	11.44
Hanwoo	13	8.70727	23	10.1217
Hasake	2	9.585	6	9.95
Hereford	119	11.5376	117	12.2069
Hinterwaelder	3	9.42333	3	9.42333
Holstein	908	15.745	1123	15.2021
Illawarra	1	16.75	1	16.75
Jersey	96	12.8863	168	12.4624
Jutland	5	8.424	5	8.424
Kalmykian	0	NA	10	15.825
Kazakh	8	9.9552	13	10.3362
Kholmogory	20	11.6767	20	11.677
Limia	1	NA	1	NA
Limonero	9	4.76753	8	4.80673
Limousin	99	9.8888	104	9.83561
Luxi	7	8.8923	1	8.92452
MaineAnjou	20	16.614	22	15.4481
Maremmana	1	NA	1	NA
Maronesa	1	NA	0	NA
Menggu	2	10.235	11	9.3
MeuseRhineYssel	4	8.7575	5	9.4376
ModernDanishRed	54	7.7287	58	7.87595
Mongolian	1	10.2348	7	10.528
Montbeliarde	63	12.5992	63	12.6543
MurrayGrey	2	11.79	2	11.79
Nanyang	7	8.67622	0	NA
NDama	12	6.83355	1	16.3626
Normande	44	11.3723	45	11.41
NorthernFinncattle	0	NA	9	16.5089
NorwegianRed	21	9.823	343	8.95836
Ottonese	0	NA	2	8.97
Pajuna	1	NA	1	#DIV/0!
Parthenaise	2	8.76	2	8.76
Piedmontese	9	9.29771	10	9.39194
Pinzgauer	1	32.78	12	16.9945
Podolica	1	NA	0	NA
Qinchuan	2	9.295	0	NA
Rendena	0	NA	2	11.075
Ringamåko	1	NA	2	14.765
Rölla	2	NA	9	20.0167
Romagnola	5	7.026	16	9.98159
RougeDesPres	8	8.8925	9	10.2022
Salers	12	8.89476	25	13.88
SanMartinero	2	4.76403	2	4.76403
Sayaguesa	1	NA	1	NA
ScottishHighland	4	22.2625	8	20.567
Shorthorn	13	11.0691	33	18.5881
SouthAnatolianRed	1	14.05	0	NA
Sikias	0	NA	1	17.4668
Stabilizer	2	11.575	2	11.575
SwedishRed	35	7.79657	35	7.79657
Tarentaise	12	10.3304	12	10.3304
TexasLonghorn	4	10.4093	0	NA
TraditionalDanishRed	15	8.476	15	8.476
Tuli	2	9.78	0	NA
TuranoMongolicus	0	NA	1	7.27
Tuxer	1	43.82	1	43.8
TyroleanGrey	4	22.5125	16	18.1916
UkrainianGrey	0	NA	8	16.2338
Unknown	147	13.7187	26	22.3802
Väko	0	NA	5	23.648
Vorderwaelder	6	11.9667	6	11.9667
Vosgienne	4	10.9975	4	10.9975
Wagyu	1	15.06	1	16.1455
Xizang	2	9.16	0	NA
Yakut	20	11.1851	35	13.0077
Yanbian	3	9.18161	11	9.52044
Yaroslavl	0	NA	10	11.471
Grand Total	3092	12.6634	4109	12.6483

## Sheet: SuppTable 3a - NoVar-ProdTraits
Supp Table 3a. Number variants per trait, organisation, breed, and breed group for production traits
trait	organisation	breed	breed category	sex	number of variants
MY	Aarhus University	Holstein	Holstein	M	16417422
MY	Aarhus University	Jersey	Jersey	M	12884489
MY	Aarhus University	Nordic Red	Red	M	17586270
MY	Agriculture Victoria	Australian Red	Red	F	16694977
MY	Agriculture Victoria	Holstein	Holstein	M	14994246
MY	Agriculture Victoria	Holstein	Holstein	F	14864755
MY	Agriculture Victoria	Jersey	Jersey	M	13268054
MY	Agriculture Victoria	Jersey	Jersey	F	12838915
MY	ETH	Braunvieh	Brown + Dual purpose	M	18198899
MY	ETH	Braunvieh	Brown + Dual purpose	F	18565518
MY	GENO	Norwegian Red	Red	F	14716626
MY	INIA	Holstein	Holstein	M	15082624
MY	INRAE	Holstein	Holstein	M	15394378
MY	INRAE	Montbeliarde	Dual purpose	M	14004580
MY	INRAE	Normande	Normande	M	14656202
MY	Qualitas	Holstein	Holstein	F	16822801
MY	Qualitas	Holstein	Holstein	M	16336837
MY	Qualitas	Swiss Fleckvieh	Dual purpose	F	16161570
MY	Qualitas	Swiss Fleckvieh	Dual purpose	M	15870376
MY	Qualitas	Simmental	Dual purpose	F	14060713
MY	Qualitas	Simmental	Dual purpose	M	14513312
MY	Teagasc	Holstein	Holstein	F	21726665
MY	Teagasc	Holstein	Holstein	M	21956793
MY	TUM	Brown Swiss	Brown	M	10003611
MY	TUM	Fleckvieh	Dual purpose	M	12833781
MY	VIT	Holstein	Holstein	M	16403576
MY	WUR	Holstein	Holstein	M	18168096
FY	Aarhus University	Holstein	Holstein	M	16417422
FY	Aarhus University	Jersey	Jersey	M	12842944
FY	Aarhus University	Nordic Red	Red	M	17586270
FY	Agriculture Victoria	Australian Red	Red	F	16692879
FY	Agriculture Victoria	Holstein	Holstein	M	14986047
FY	Agriculture Victoria	Holstein	Holstein	F	14865358
FY	Agriculture Victoria	Jersey	Jersey	M	13256818
FY	Agriculture Victoria	Jersey	Jersey	F	12840245
FY	ETH	Braunvieh	Brown + Dual purpose	M	18199494
FY	ETH	Braunvieh	Brown + Dual purpose	F	18565538
FY	GENO	Norwegian Red	Red	F	14716767
FY	INIA	Holstein	Holstein	M	15082624
FY	INRAE	Holstein	Holstein	M	15395075
FY	INRAE	Montbeliarde	Dual purpose	M	14921858
FY	INRAE	Normande	Normande	M	14182102
FY	Qualitas	Holstein	Holstein	F	16822641
FY	Qualitas	Holstein	Holstein	M	16420404
FY	Qualitas	Swiss Fleckvieh	Dual purpose	F	16161186
FY	Qualitas	Swiss Fleckvieh	Dual purpose	M	15870755
FY	Qualitas	Simmental	Dual purpose	F	14064662
FY	Qualitas	Simmental	Dual purpose	M	14513703
FY	Teagasc	Holstein	Holstein	F	21726665
FY	Teagasc	Holstein	Holstein	M	21956793
FY	TUM	Brown Swiss	Brown	M	9998143
FY	TUM	Fleckvieh	Dual purpose	M	12831484
FY	VIT	Holstein	Holstein	M	16403862
FY	WUR	Holstein	Holstein	M	18168418
PY	Aarhus University	Holstein	Holstein	M	16411199
PY	Aarhus University	Jersey	Jersey	M	12865536
PY	Aarhus University	Nordic Red	Red	M	17583093
PY	Agriculture Victoria	Australian Red	Red	F	16695355
PY	Agriculture Victoria	Holstein	Holstein	M	14992806
PY	Agriculture Victoria	Holstein	Holstein	F	14866522
PY	Agriculture Victoria	Jersey	Jersey	M	13256784
PY	Agriculture Victoria	Jersey	Jersey	F	12840546
PY	ETH	Braunvieh	Brown + Dual purpose	M	18212962
PY	ETH	Braunvieh	Brown + Dual purpose	F	18561276
PY	GENO	Norwegian Red	Red	F	14715893
PY	INIA	Holstein	Holstein	M	15082624
PY	INRAE	Holstein	Holstein	M	14627649
PY	INRAE	Montbeliarde	Dual purpose	M	15666839
PY	INRAE	Normande	Normande	M	13705759
PY	Qualitas	Holstein	Holstein	F	16821688
PY	Qualitas	Holstein	Holstein	M	16420507
PY	Qualitas	Swiss Fleckvieh	Dual purpose	F	16161033
PY	Qualitas	Swiss Fleckvieh	Dual purpose	M	15869696
PY	Qualitas	Simmental	Dual purpose	F	14064420
PY	Qualitas	Simmental	Dual purpose	M	14513079
PY	Teagasc	Holstein	Holstein	F	21726665
PY	Teagasc	Holstein	Holstein	M	21953126
PY	TUM	Brown Swiss	Brown	M	9997406
PY	TUM	Fleckvieh	Dual purpose	M	12833285
PY	VIT	Holstein	Holstein	M	16403459
PY	WUR	Holstein	Holstein	M	18168387
FC	Aarhus University	Holstein	Holstein	M	16417422
FC	Aarhus University	Jersey	Jersey	M	12842944
FC	Aarhus University	Nordic Red	Red	M	17586270
FC	Agriculture Victoria	Australian Red	Red	F	16693493
FC	Agriculture Victoria	Holstein	Holstein	M	14980620
FC	Agriculture Victoria	Holstein	Holstein	F	14865534
FC	Agriculture Victoria	Jersey	Jersey	M	13268957
FC	Agriculture Victoria	Jersey	Jersey	F	12834754
FC	ETH	Braunvieh	Brown + Dual purpose	M	18218743
FC	ETH	Braunvieh	Brown + Dual purpose	F	18560498
FC	GENO	Norwegian Red	Red	F	14716188
FC	INRAE	Holstein	Holstein	M	14399411
FC	INRAE	Montbeliarde	Dual purpose	M	14625560
FC	INRAE	Normande	Normande	M	14040631
FC	Qualitas	Holstein	Holstein	F	16822641
FC	Qualitas	Holstein	Holstein	M	16417206
FC	Qualitas	Swiss Fleckvieh	Dual purpose	F	16161186
FC	Qualitas	Swiss Fleckvieh	Dual purpose	M	15871265
FC	Qualitas	Simmental	Dual purpose	F	14064662
FC	Qualitas	Simmental	Dual purpose	M	14513709
FC	Teagasc	Holstein	Holstein	F	21726048
FC	Teagasc	Holstein	Holstein	M	21931102
FC	TUM	Brown Swiss	Brown	M	9990908
FC	TUM	Fleckvieh	Dual purpose	M	12827762
PC	Aarhus University	Holstein	Holstein	M	16411199
PC	Aarhus University	Jersey	Jersey	M	12865538
PC	Aarhus University	Nordic Red	Red	M	17583093
PC	Agriculture Victoria	Australian Red	Red	F	16699203
PC	Agriculture Victoria	Holstein	Holstein	M	14982514
PC	Agriculture Victoria	Holstein	Holstein	F	14860968
PC	Agriculture Victoria	Jersey	Jersey	M	13271298
PC	Agriculture Victoria	Jersey	Jersey	F	12837539
PC	ETH	Braunvieh	Brown + Dual purpose	M	18218681
PC	ETH	Braunvieh	Brown + Dual purpose	F	18565970
PC	GENO	Norwegian Red	Red	F	14717112
PC	INRAE	Holstein	Holstein	M	14380401
PC	INRAE	Montbeliarde	Dual purpose	M	13244558
PC	INRAE	Normande	Normande	M	13918520
PC	Qualitas	Holstein	Holstein	F	16821688
PC	Qualitas	Holstein	Holstein	M	16417578
PC	Qualitas	Swiss Fleckvieh	Dual purpose	F	16161033
PC	Qualitas	Swiss Fleckvieh	Dual purpose	M	15870605
PC	Qualitas	Simmental	Dual purpose	F	14064420
PC	Qualitas	Simmental	Dual purpose	M	14513379
PC	Teagasc	Holstein	Holstein	F	21726048
PC	Teagasc	Holstein	Holstein	M	21955915
PC	TUM	Brown Swiss	Brown	M	9994170
PC	TUM	Fleckvieh	Dual purpose	M	12826381

## Sheet: SuppTable 3b - NoVar-FertTraits
Supp Table 3b. Number variants per trait, organisation, breed, and breed group for fertility traits
trait	Interbull trait	measured trait	organisation	breed	breed group	sex	number of variants
Hfert	T1	number of inseminations before conception, heifer	GENO	Norwegian Red	Red	F	14712499
Hfert	T1	heifer conception rate	INRAE	Holstein	Holstein	M	15324583
Hfert	T1	heifer conception rate	INRAE	Montbeliarde	Dual purpose	M	15523414
Hfert	T1	heifer conception rate	INRAE	Normande	Normande	M	13881481
Hfert	T1	non return rate heifers	Qualitas	Holstein	Holstein	F	15408783
Hfert	T1	interval first to last insemination heifers	Qualitas	Holstein	Holstein	F	15293697
Hfert	T1	non return rate heifers	Qualitas	Holstein	Holstein	M	16179245
Hfert	T1	interval first to last insemination heifers	Qualitas	Holstein	Holstein	M	16033746
Hfert	T1	non return rate heifers	Qualitas	Swiss Fleckvieh	Dual purpose	F	14392019
Hfert	T1	interval first to last insemination heifers	Qualitas	Swiss Fleckvieh	Dual purpose	F	14249092
Hfert	T1	non return rate heifers	Qualitas	Swiss Fleckvieh	Dual purpose	M	15744084
Hfert	T1	interval first to last insemination heifers	Qualitas	Swiss Fleckvieh	Dual purpose	M	15621024
Hfert	T1	non return rate heifers	Qualitas	Simmental	Dual purpose	F	11938834
Hfert	T1	interval first to last insemination heifers	Qualitas	Simmental	Dual purpose	F	11553372
Hfert	T1	non return rate heifers	Qualitas	Simmental	Dual purpose	M	13924147
Hfert	T1	interval first to last insemination heifers	Qualitas	Simmental	Dual purpose	M	13764172
Hfert	T1	interval first to last insemination heifers	TUM	Brown Swiss	Brown	M	10006267
Hfert	T1	non return rate heifers	TUM	Brown Swiss	Brown	M	10007459
Hfert	T1	interval first to last insemination heifers	TUM	Fleckvieh	Dual purpose	M	12843699
Hfert	T1	non return rate heifers	TUM	Fleckvieh	Dual purpose	M	12842503
Hfert	T1	heifer conception	VIT	Holstein	Holstein	M	16402663
Hfert	T1	age first insemination heifers	WUR	Holstein	Holstein	M	18165214
Hfert	T1	conception rate heifers	WUR	Holstein	Holstein	M	18168594
CalvMate	T2	interval from calving to first service	ETH	Braunvieh	Brown + Dual purpose	M	18092307
CalvMate	T2	interval from calving to first service	ETH	Braunvieh	Brown + Dual purpose	F	18229499
CalvMate	T2	interval from calving to first service	GENO	Norwegian Red	Red	F	14710619
CalvMate	T2	interval from calving to first service	INIA	Holstein	Holstein	M	15080547
CalvMate	T2	interval from calving to first service	INRAE	Holstein	Holstein	M	14337959
CalvMate	T2	interval from calving to first service	INRAE	Montbeliarde	Dual purpose	M	15586085
CalvMate	T2	interval from calving to first service	INRAE	Normande	Normande	M	13813718
CalvMate	T2	interval from calving to first service	Qualitas	Holstein	Holstein	F	15677836
CalvMate	T2	interval from calving to first service	Qualitas	Holstein	Holstein	M	16185458
CalvMate	T2	interval from calving to first service	Qualitas	Swiss Fleckvieh	Dual purpose	F	15774453
CalvMate	T2	interval from calving to first service	Qualitas	Swiss Fleckvieh	Dual purpose	M	15758778
CalvMate	T2	interval from calving to first service	Qualitas	Simmental	Dual purpose	F	13532245
CalvMate	T2	interval from calving to first service	Qualitas	Simmental	Dual purpose	M	14125495
CalvMate	T2	interval from calving to first service	TUM	Brown Swiss	Brown	M	10000996
CalvMate	T2	interval from calving to first service	TUM	Fleckvieh	Dual purpose	M	12837734
CalvMate	T2	interval from calving to first service	VIT	Holstein	Holstein	M	16402436
CalvMate	T2	interval from calving to first service	WUR	Holstein	Holstein	M	18168150
Conc	T3	conception rate	Aarhus University	Holstein	Holstein	M	16416460
Conc	T3	conception rate	Aarhus University	Jersey	Jersey	M	12827710
Conc	T3	conception rate	LUKE	Nordic Red	Red	M	17592807
Conc	T3	non return rate	ETH	Braunvieh	Brown + Dual purpose	M	18069370
Conc	T3	non return rate	ETH	Braunvieh	Brown + Dual purpose	F	16336505
Conc	T3	number of inseminations before conception	GENO	Norwegian Red	Red	F	14704897
Conc	T3	conception rate	INRAE	Holstein	Holstein	M	14976963
Conc	T3	conception rate	INRAE	Montbeliarde	Dual purpose	M	15588537
Conc	T3	conception rate	INRAE	Normande	Normande	M	14615355
Conc	T3	non return rate	Qualitas	Holstein	Holstein	F	16184630
Conc	T3	non return rate	Qualitas	Holstein	Holstein	M	16238226
Conc	T3	non return rate	Qualitas	Swiss Fleckvieh	Dual purpose	F	15335794
Conc	T3	non return rate	Qualitas	Swiss Fleckvieh	Dual purpose	M	15626715
Conc	T3	non return rate	Qualitas	Simmental	Dual purpose	F	13065656
Conc	T3	non return rate	Qualitas	Simmental	Dual purpose	M	14060511
Conc	T3	non return rate	TUM	Brown Swiss	Brown	M	10002536
Conc	T3	non return rate	TUM	Fleckvieh	Dual purpose	M	12838823
Conc	T3	non return rate	VIT	Holstein	Holstein	M	16400812
Conc	T3	conception rate	WUR	Holstein	Holstein	M	18167988
Conc	T3	non return rate	WUR	Holstein	Holstein	M	18165215
Int1stlast	T4	interval first to last insemination	Aarhus University	Holstein	Holstein	M	16412820
Int1stlast	T4	interval first to last insemination	Aarhus University	Jersey	Jersey	M	12865537
Int1stlast	T4	interval first to last insemination	LUKE	Nordic Red	Red	M	17592807
Int1stlast	T4	interval first to last insemination	ETH	Braunvieh	Brown + Dual purpose	M	18100300
Int1stlast	T4	interval first to last insemination	ETH	Braunvieh	Brown + Dual purpose	F	17443869
Int1stlast	T4	interval first to last insemination	INIA	Holstein	Holstein	M	15083141
Int1stlast	T4	interval first to last insemination	Qualitas	Holstein	Holstein	F	16312189
Int1stlast	T4	interval first to last insemination	Qualitas	Holstein	Holstein	M	16164497
Int1stlast	T4	interval first to last insemination	Qualitas	Swiss Fleckvieh	Dual purpose	F	15502428
Int1stlast	T4	interval first to last insemination	Qualitas	Swiss Fleckvieh	Dual purpose	M	15644857
Int1stlast	T4	interval first to last insemination	Qualitas	Simmental	Dual purpose	F	13257412
Int1stlast	T4	interval first to last insemination	Qualitas	Simmental	Dual purpose	M	13968881
Int1stlast	T4	interval first to last insemination	TUM	Brown Swiss	Brown	M	9999599
Int1stlast	T4	interval first to last insemination	TUM	Fleckvieh	Dual purpose	M	12838766
Int1stlast	T4	interval first to last insemination	VIT	Holstein	Holstein	M	16401357
Int1stlast	T4	interval first to last insemination	WUR	Holstein	Holstein	M	18167587
CalvInt	T5	calving interval	Agriculture Victoria	Australian Red	Red	F	16691446
CalvInt	T5	calving interval	Agriculture Victoria	Holstein	Holstein	M	14980155
CalvInt	T5	calving interval	Agriculture Victoria	Holstein	Holstein	F	14862558
CalvInt	T5	calving interval	Agriculture Victoria	Jersey	Jersey	M	13259947
CalvInt	T5	calving interval	Agriculture Victoria	Jersey	Jersey	F	12836544
CalvInt	T5	days open	INIA	Holstein	Holstein	M	15083083
CalvInt	T5	calving interval	VIT	Holstein	Holstein	M	16402879
CalvInt	T5	calving interval	WUR	Holstein	Holstein	M	18167340

## Sheet: SuppTable4-NoQTLRegions
Supp Table 4. Number of QTL regions per Meta-GWAS with populations used for meta-GWAS (Meta-GWAS = all breeds, HOL = Holstein, JER = Jersey, RDC = Red, BROWN = Brown, DUAL = Dual purpose), traits (MY = milk yield, FY = fat yield, PY = protein yield, FC = fat content, PC = protein content, Hfert = heifer fertility, CalvMate = interval calving to first mating, Conc = conception rate, Int1stLast = i…
population	trait	nQtlRegions	nQtlVariants	nValRegions	nValVariants	percValRegions	percValVariants
MetaGWAS	MY	595	22600	515	22015	86.5546	97.4115
MetaGWAS	FY	474	11094	389	10211	82.0675	92.0407
MetaGWAS	PY	584	14142	468	13278	80.137	93.8905
MetaGWAS	FC	330	10409	266	9809	80.6061	94.2358
MetaGWAS	PC	562	17277	476	16409	84.6975	94.976
MetaGWAS	HFert	93	2048	84	1953	90.3226	95.3613
MetaGWAS	CalvMate	158	3998	153	3938	96.8354	98.4992
MetaGWAS	Conc	123	2672	115	2520	93.4959	94.3114
MetaGWAS	Int1stLast	123	3451	121	3258	98.374	94.4074
MetaGWAS	CalvInt	153	5361	149	5206	97.3856	97.1087
HOL	MY	587	25521	432	16564	73.5945	64.9034
HOL	FY	480	12732	313	6762	65.2083	53.1103
HOL	PY	598	15911	378	8421	63.2107	52.9256
HOL	FC	285	9806	204	6665	71.5789	67.9686
HOL	PC	494	20000	365	12876	73.8866	64.38
HOL	HFert	79	2910	55	1674	69.6203	57.5258
HOL	CalvMate	265	13828	191	5537	72.0755	40.0419
HOL	Conc	234	8235	133	2959	56.8376	35.932
HOL	Int1stLast	154	6176	121	3313	78.5714	53.6431
HOL	CalvInt	156	6551	135	4890	86.5385	74.6451
JER	MY	38	1541	22	159	57.8947	10.318
JER	FY	19	1124	9	177	47.3684	15.7473
JER	PY	8	1153	6	475	75	41.1969
JER	FC	51	3372	33	561	64.7059	16.637
JER	PC	79	7322	50	1884	63.2911	25.7307
JER	Conc	0	0	0	0	NA	NA
JER	Int1stLast	0	0	0	0	NA	NA
JER	CalvInt	2	3	0	0	0	0
RDC	MY	45	1693	24	686	53.3333	40.5198
RDC	FY	25	1587	13	544	52	34.2785
RDC	PY	19	1324	10	742	52.6316	56.0423
RDC	FC	96	3592	47	1442	48.9583	40.1448
RDC	PC	125	5988	68	2897	54.4	48.3801
RDC	Hfert	0	0	0	0	NA	NA
RDC	CalvMate	0	0	0	0	NA	NA
RDC	Conc	4	11	0	0	0	0
RDC	Int1stLast	3	302	2	27	66.6667	8.9404
RDC	CalvInt	1	1	0	0	0	0
BROWN	MY	63	5060	39	1105	61.9048	21.8379
BROWN	FY	51	2719	29	865	56.8627	31.8132
BROWN	PY	26	1521	16	163	61.5385	10.7166
BROWN	FC	134	6598	86	1616	64.1791	24.4923
BROWN	PC	138	6223	80	1671	57.971	26.852
BROWN	HFert	21	869	10	101	47.619	11.6226
BROWN	CalvMate	1	1	0	0	0	0
BROWN	Conc	6	178	3	16	50	8.98876
BROWN	Int1stLast	11	838	6	25	54.5455	2.98329
DUAL	MY	81	2302	47	868	58.0247	37.7063
DUAL	FY	55	1576	32	860	58.1818	54.5685
DUAL	PY	38	1390	20	737	52.6316	53.0216
DUAL	FC	131	4180	66	1765	50.3817	42.2249
DUAL	PC	134	4060	68	1875	50.7463	46.1823
DUAL	HFert	66	522	16	40	24.2424	7.66284
DUAL	CalvMate	2	10	1	3	50	30
DUAL	Conc	4	11	0	0	0	0
DUAL	Int1stLast	10	303	2	7	20	2.31023

## Sheet: SuppTable5a-Meta-GWAS-QTL-MY
Supp Table 5a. Meta-GWAS QTL for milk yield (MY)
chr	start	end	topVariant	effectAllele	otherAllele	nRecords	Zscore	Pvalue
1	2162511	2171775	2171775	A	C	278689	-5.515	3.492e-08
1	22362988	22362988	22362988	T	C	94876	6.097	1.08e-09
1	33663906	33663906	33663906	T	C	48029	-6.026	1.678e-09
1	70494140	70496797	70494140	T	C	278689	-5.647	1.636e-08
1	119380946	119534086	119387622	A	G	278689	-5.788	7.132e-09
1	142114147	142148756	142114147	T	C	258447	6.508	7.61e-11
1	142806542	142914118	142835551	T	C	278689	12.073	1.471e-33
1	143338124	143459378	143419282	T	C	271292	7.31	2.68e-13
1	144015259	144306817	144058059	T	G	270860	-6.181	6.377e-10
1	144988956	145277798	145277798	T	G	256381	5.571	2.533e-08
1	152360923	152393426	152386273	T	C	278689	7.427	1.108e-13
2	3513231	3684581	3594363	A	G	281841	-5.785	7.271e-09
2	58835585	58835585	58835585	A	G	80497	-6.298	3.014e-10
2	105097184	105143951	105143265	T	C	281841	6.284	3.299e-10
2	115381153	115381258	115381153	A	G	83190	5.739	9.514e-09
2	127011510	127049507	127011510	A	G	83190	-5.657	1.543e-08
2	129208967	129238242	129208967	A	G	242853	6.178	6.507e-10
3	9963430	9974548	9963430	A	G	261113	-5.571	2.533e-08
3	13026265	13026265	13026265	T	C	189891	5.554	2.8e-08
3	13627777	13627777	13627777	T	C	80497	-9.886	4.765e-23
3	14114912	14328384	14130319	CT	C	179254	5.91	3.415e-09
3	14628864	14923691	14848681	T	C	257961	8.289	1.137e-16
3	15317396	15498139	15464742	T	C	275657	-14.202	8.881e-46
3	15970918	16092327	15976954	A	G	281841	8.385	5.082e-17
3	16525976	17165103	16771091	T	C	278202	-6.239	4.396e-10
3	20412728	20486104	20486104	C	G	281841	-5.598	2.168e-08
3	21222447	21443089	21222447	T	C	279148	-6.486	8.833e-11
3	26379733	26379733	26379733	A	T	48029	-5.663	1.485e-08
3	30531261	30857876	30571231	A	G	209297	-6.088	1.14e-09
3	30942924	31758462	31368881	A	G	206326	6.434	1.241e-10
3	32158329	32827914	32332183	A	G	236173	6.78	1.201e-11
3	32857077	33169686	32857077	A	C	225511	5.974	2.314e-09
3	33188938	33693463	33685667	A	G	223744	6.244	4.257e-10
3	34193986	34492040	34274095	T	G	275657	-9.889	4.627e-23
3	34863840	35023165	35005106	A	C	204468	6.623	3.524e-11
3	53490568	53593861	53527301	T	C	272968	-6.228	4.727e-10
3	53593901	54508233	54093878	A	G	280628	-6.944	3.816e-12
3	80431516	80605702	80605702	T	C	281841	6.291	3.162e-10
3	84012805	84029932	84029932	A	T	108093	-5.998	1.995e-09
3	87473818	87475641	87475432	T	C	83649	-11.706	1.193e-31
3	90873290	90873290	90873290	T	C	281841	5.468	4.558e-08
3	95211402	95367258	95365932	T	C	280196	-5.759	8.48e-09
3	103125690	103178788	103128415	A	G	281841	6.507	7.646e-11
3	112258677	112260746	112258677	A	G	280196	-5.487	4.093e-08
3	120686947	120698075	120686947	A	G	280628	-5.689	1.278e-08
4	10207086	10286663	10212342	C	G	280196	-8.867	7.508e-19
4	34331471	34336852	34332638	A	G	48029	10.432	1.779e-25
4	40010154	40010154	40010154	A	G	207161	6.035	1.59e-09
4	40071262	40559646	40553357	G	GC	249385	6.573	4.92e-11
4	46635276	47065694	47052342	A	G	64153	-6.669	2.584e-11
4	48793869	48793869	48793869	A	T	109255	5.517	3.446e-08
4	62512502	62512502	62512502	T	C	25901	5.476	4.347e-08
4	63659340	63879323	63659340	A	G	25901	6.414	1.419e-10
4	64416643	64518599	64506573	T	C	281841	5.617	1.94e-08
4	77093841	77227828	77179446	T	G	275657	5.698	1.21e-08
4	112796502	113004377	112796751	T	C	281841	-7.04	1.927e-12
4	113391086	113821280	113636112	T	C	262758	6.115	9.637e-10
4	114509213	114941125	114582987	T	G	269183	6.313	2.744e-10
4	117650807	117667820	117663204	A	C	281841	-6.548	5.82e-11
4	118658588	118666436	118666436	A	G	205471	-5.837	5.317e-09
5	20079202	20505242	20194575	A	G	281841	-7.092	1.322e-12
5	23507534	23599007	23595282	T	G	275657	-9.109	8.289e-20
5	24111893	24111893	24111893	G	GAAC	255738	5.517	3.457e-08
5	29374225	29685312	29680442	A	G	281841	-6.532	6.491e-11
5	30198564	30631917	30515053	T	C	274012	-7.495	6.654e-14
5	30899727	31204916	31135435	T	G	258977	11.314	1.113e-29
5	31902605	32622979	32123203	A	C	281841	-8.747	2.187e-18
5	32632627	32910980	32641924	T	TAGTG	197109	7.601	2.937e-14
5	33156189	33179491	33179491	CAGTGGAAAG	C	82906	5.941	2.837e-09
5	33861479	33896479	33884117	T	C	281841	8.15	3.626e-16
5	34676947	34825465	34689165	A	T	275657	6.333	2.406e-10
5	34881699	35533714	35336848	A	G	60877	6.971	3.158e-12
5	37634691	37673840	37650012	A	G	281841	6.251	4.087e-10
5	38430559	38452253	38452253	A	C	262326	-5.503	3.733e-08
5	42622541	42992412	42629532	A	G	235108	-5.739	9.521e-09
5	73202429	73248321	73207677	C	G	278689	-6.569	5.072e-11
5	74292657	74800531	74309697	T	G	147156	6.684	2.33e-11
5	75249134	75543525	75394537	T	C	281841	13.334	1.462e-40
5	75907360	76146401	76083856	T	C	237008	-6.992	2.705e-12
5	76147432	76731464	76647129	A	T	237008	-7.225	5.029e-13
5	77247728	77678650	77254899	T	C	281841	-6.82	9.081e-12
5	78892585	78892585	78892585	C	G	281841	-5.468	4.542e-08
5	81643115	81643115	81643115	A	G	281841	-5.475	4.378e-08
5	83964918	84128851	84111839	T	C	281841	7.682	1.563e-14
5	85083499	85837490	85449921	T	C	281841	7.85	4.154e-15
5	86205868	87188782	86692122	T	C	273521	-7.179	7.004e-13
5	87192354	87346733	87339211	T	G	207620	-7.057	1.696e-12
5	87429354	87857878	87855486	T	C	257888	-8.53	1.462e-17
5	88394121	88406861	88406861	A	G	281841	-20.68	5.26e-95
5	88907538	89010306	88999543	A	G	204468	6.415	1.411e-10
5	89213702	89979807	89512620	A	G	277503	8.978	2.754e-19
5	90016361	90135629	90135629	T	C	245885	6.423	1.334e-10
5	90635580	90933461	90683163	A	G	281841	9.683	3.55e-22
5	91288694	91288694	91288694	C	G	189306	5.623	1.872e-08
5	91889454	92004693	91889454	A	G	213804	11.477	1.723e-30
5	92716189	92954598	92788925	A	G	281841	14.665	1.077e-48
5	93482220	93525109	93515983	T	G	223785	21.436	6.17e-102
5	94108755	94309787	94229261	C	G	216497	14.455	2.316e-47
5	94738538	95183027	95154928	C	G	280196	9.49	2.305e-21
5	95718225	95718225	95718225	A	G	196336	-5.462	4.7e-08
5	95807568	96266549	96259148	T	C	281841	7.063	1.635e-12
5	96684393	96840597	96828838	A	G	280196	8.441	3.145e-17
5	97397526	97763723	97402642	T	C	281841	-7.459	8.699e-14
5	103429947	103520236	103429947	T	C	281841	-5.73	1.003e-08
5	105041177	105790990	105464549	A	G	281841	6.321	2.591e-10
5	107841127	108325369	108203641	T	C	267297	6.009	1.862e-09
5	108702505	109319217	108880390	A	C	236402	6.501	7.971e-11
5	110007864	110074975	110074975	A	ATGC	268637	6.256	3.949e-10
5	110146177	110581787	110578860	A	G	280196	6.502	7.935e-11
5	110774931	111401648	111130673	T	C	178058	-7.301	2.855e-13
5	111797634	111987586	111913383	C	G	281841	-16.363	3.523e-60
5	112416995	112576387	112575842	A	T	281841	-7.228	4.892e-13
5	114940537	115265761	115265761	T	C	265455	6.006	1.901e-09
5	115512800	116087883	115857312	A	G	281841	-6.305	2.879e-10
5	116578894	116578894	116578894	C	G	82736	5.532	3.172e-08
5	116978132	117276801	117132182	T	C	274498	9.811	1.007e-22
6	21865472	21918867	21865472	A	G	13474	5.827	5.658e-09
6	23288099	23332857	23332857	T	C	71608	6.007	1.887e-09
6	24624671	24624671	24624671	A	G	26678	5.475	4.38e-08
6	33245943	33245943	33245943	A	C	55903	5.925	3.117e-09
6	33681203	34366475	34101640	A	C	16637	6.499	8.064e-11
6	35048854	35146528	35048854	A	C	26678	-7.794	6.491e-15
6	35923230	36034678	36016802	T	C	281841	7.069	1.556e-12
6	36269693	36824721	36541080	T	C	48270	12.649	1.136e-36
6	37053122	37518644	37053122	T	G	189881	6.602	4.054e-11
6	37847038	37879564	37879564	A	T	189881	5.741	9.39e-09
6	38798283	39227318	38818459	A	C	71698	-8.751	2.107e-18
6	39335765	39408703	39387244	A	G	51240	8.018	1.075e-15
6	39627048	39976359	39976359	T	C	26678	9.031	1.696e-19
6	40618656	40618656	40618656	A	G	23245	7.524	5.332e-14
6	41776171	41817350	41813932	C	G	13474	6.131	8.748e-10
6	46325404	46330692	46328874	A	G	281841	5.649	1.617e-08
6	58562390	58568756	58562390	G	GA	245773	-5.688	1.287e-08
6	81636193	81685413	81685413	T	C	281841	-7.691	1.46e-14
6	81706608	82461745	82201805	A	T	281841	-7.847	4.265e-15
6	82516347	82993450	82973618	A	G	281841	8.17	3.073e-16
6	83276726	83952653	83761228	T	G	281841	-9.247	2.308e-20
6	84262844	84511036	84497294	A	G	247825	7.752	9.045e-15
6	84967079	85031338	85031338	T	G	275996	11.179	5.153e-29
6	85381750	85700249	85564082	A	G	280196	-13.449	3.127e-41
6	86152846	86414368	86408387	T	C	281841	9.428	4.184e-21
6	86940863	87295188	87018377	T	C	280628	20.457	5.25e-93
6	87526289	87919948	87687673	T	C	253402	-8.54	1.342e-17
6	88376672	88900372	88403988	A	G	262468	-6.622	3.549e-11
6	88913170	89616728	89407092	C	G	281841	6.872	6.333e-12
6	91615233	91615233	91615233	A	G	274012	-5.482	4.194e-08
6	114163183	114163183	114163183	C	G	116005	-6.393	1.626e-10
7	12349229	12791869	12472278	T	G	281841	-7.337	2.186e-13
7	16521674	16524699	16523091	T	C	280628	-5.74	9.455e-09
7	17172780	17184937	17184937	T	C	277476	5.508	3.637e-08
7	17635512	18240449	17943535	A	G	281841	6.898	5.274e-12
7	42604480	43083849	43071798	C	G	281841	-6.357	2.056e-10
7	43693932	43935699	43693932	A	G	272505	-8.073	6.854e-16
7	69135975	69135975	69135975	A	G	96621	6.262	3.809e-10
7	80395648	80708677	80396170	T	C	281841	6.001	1.961e-09
7	82946890	82946890	82946890	T	C	48029	5.452	4.99e-08
7	96875174	96875174	96875174	A	T	80497	-10.129	4.088e-24
8	29951952	30120217	30074300	A	G	281841	6.852	7.263e-12
8	30764326	30765923	30764326	A	G	281841	5.484	4.16e-08
8	39472089	39591647	39555462	A	G	281841	9.921	3.39e-23
8	40683554	41141459	41084443	A	G	280628	6.83	8.494e-12
8	41791516	42006662	41861586	T	C	223744	-5.819	5.933e-09
8	43154735	43184856	43173718	T	C	281841	-6.04	1.537e-09
8	49589404	49589404	49589404	T	G	48029	-6.005	1.919e-09
8	83407204	83407204	83407204	T	G	218584	-5.491	4.001e-08
8	88022841	88161777	88027704	T	C	281841	-6.949	3.683e-12
8	109540313	109540313	109540313	A	G	6184	5.577	2.443e-08
8	111318888	111348675	111321294	T	C	243117	6.072	1.265e-09
9	10323105	10477153	10361121	A	G	281841	-6.5	8.055e-11
9	26184559	26239444	26209315	C	G	281841	-6.704	2.032e-11
9	31379114	31889631	31833521	T	C	281841	6.45	1.122e-10
9	32701542	33148505	32724859	T	C	271876	7.04	1.925e-12
9	59533157	59533157	59533157	A	G	281841	-5.754	8.704e-09
9	86384005	86436737	86384005	C	G	281841	7.984	1.419e-15
9	88675664	89088417	88715194	T	C	281841	-5.957	2.575e-09
9	99828041	99828041	99828041	A	G	19204	5.974	2.311e-09
9	100456861	100928214	100464921	T	C	249301	6.254	4.005e-10
10	1070525	1070525	1070525	T	C	281841	5.544	2.954e-08
10	2137692	2194469	2189334	A	G	280196	-7.693	1.44e-14
10	5414428	5468025	5437586	C	G	274012	-6.146	7.957e-10
10	13316228	13316228	13316228	T	C	281841	-5.693	1.247e-08
10	45699305	46014567	45995299	T	C	278689	-6.214	5.166e-10
10	46129284	46544939	46515923	A	G	275657	12.315	7.538e-35
10	48425872	48425872	48425872	A	C	281841	-7.526	5.25e-14
10	53014403	53416094	53277746	A	G	278689	5.704	1.173e-08
11	964279	1093711	1074007	T	C	278689	-6.264	3.76e-10
11	21041090	21041090	21041090	T	C	278689	-6.087	1.15e-09
11	22185246	22185246	22185246	C	G	267266	-5.498	3.849e-08
11	25538563	25538563	25538563	A	G	278689	5.484	4.159e-08
11	38458547	38480395	38466851	T	C	278689	5.789	7.062e-09
11	62606035	63020245	62705618	A	T	224761	7.2	6.025e-13
11	63259990	63629977	63557329	T	C	278689	8.753	2.08e-18
11	64085921	64607469	64528701	A	G	278689	6.413	1.425e-10
11	72850251	72869443	72850251	A	C	278689	6.656	2.814e-11
11	90390800	90392995	90391474	T	C	278689	-5.801	6.591e-09
11	100172917	100232149	100199053	A	G	278689	-6.08	1.202e-09
11	101141000	101173298	101159290	T	C	237008	-6.255	3.972e-10
11	101685921	102234333	101745212	T	C	278689	7.635	2.251e-14
11	102245448	102668597	102341120	A	G	260417	6.783	1.181e-11
11	103243846	103277147	103272447	A	G	278689	-16.142	1.291e-58
11	104155264	104207983	104161995	C	G	278689	7.372	1.686e-13
12	9812208	9812208	9812208	T	C	80497	6.308	2.833e-10
12	19128100	19769884	19407514	A	G	281841	6.371	1.88e-10
12	19951499	19951499	19951499	A	G	281841	-6.019	1.753e-09
12	20960985	20960985	20960985	A	G	62019	-5.935	2.939e-09
12	29041288	29137352	29102445	A	T	257497	6.786	1.156e-11
12	29611114	30129527	29630745	A	G	280196	-6.698	2.115e-11
12	30336761	30364771	30337283	A	T	281841	5.585	2.338e-08
12	30886354	31342682	31047394	A	G	274012	6.744	1.537e-11
12	31639662	31639662	31639662	T	C	208249	-5.767	8.07e-09
12	51878935	52003117	52003117	A	G	92526	-5.882	4.045e-09
12	69659810	69767708	69704930	C	G	281841	7.801	6.166e-15
12	73283010	73727490	73716144	A	AC	268637	5.993	2.058e-09
13	15839954	16005988	15840042	T	C	281841	7.755	8.818e-15
13	16420516	16420516	16420516	A	G	257888	-5.452	4.986e-08
13	16999633	16999633	16999633	C	G	281841	-5.519	3.407e-08
13	17399974	17523348	17523348	A	G	217371	-5.864	4.531e-09
13	19379366	19379366	19379366	A	G	281841	-5.567	2.599e-08
13	35674681	35845836	35675386	C	G	280196	5.862	4.566e-09
13	36665679	36699135	36687210	A	G	274012	7.317	2.536e-13
13	37944236	38073891	38046197	A	G	281841	-6.53	6.566e-11
13	44477729	44477729	44477729	A	C	187846	9.247	2.307e-20
13	45774714	46301900	45885050	A	G	281841	7.152	8.552e-13
13	47467526	47538523	47467526	A	T	281841	-5.813	6.15e-09
13	48192694	48192694	48192694	A	G	254539	-6.002	1.946e-09
13	48255147	48785374	48742411	T	C	281841	-6.077	1.224e-09
13	49415456	49415456	49415456	T	C	233923	5.726	1.027e-08
13	53736323	53984853	53870860	T	C	280628	-6.918	4.576e-12
13	53986153	54554901	54485798	A	G	281841	-7.101	1.235e-12
13	54587414	55192056	55081119	A	G	276468	-7.162	7.939e-13
13	57544274	57544274	57544274	T	C	204468	-5.686	1.302e-08
13	63208172	63474523	63474523	A	G	75059	-5.701	1.19e-08
13	64011333	64304456	64187069	A	G	274012	6.091	1.125e-09
13	68151321	68151321	68151321	A	G	281841	-5.471	4.483e-08
13	76883387	76985437	76883387	T	G	265717	-5.582	2.38e-08
13	77994631	78300576	78250060	A	C	281841	6.966	3.27e-12
13	78790111	78803322	78803322	A	G	274012	-5.895	3.737e-09
14	232284	888113	612591	T	C	148892	80.296	9.25e-1403
14	1137961	1187315	1137961	T	C	155250	-41.458	1.15e-375
14	1270042	1760890	1740723	A	C	165425	48.87	4.03e-521
14	2243777	2302055	2247082	T	C	253982	-28.439	6.63e-178
14	2765573	3274430	2781914	C	G	275657	-17.363	1.574e-67
14	3324945	3688201	3345131	T	C	281841	17.19	3.131e-66
14	3874277	4075645	4062542	A	G	275657	-11.318	1.069e-29
14	4440127	4642779	4591982	A	G	281841	-13.106	3.041e-39
14	5301251	5303304	5301667	T	C	281841	11.307	1.218e-29
14	5875394	6288985	6275383	T	C	281841	-10.199	1.998e-24
14	6553247	6902742	6902742	T	C	281841	-11.029	2.768e-28
14	7486824	7874881	7857053	A	ATGAACTGATCGCTCCT	196165	9.268	1.891e-20
14	8368615	8479516	8448973	A	C	281841	-6.221	4.948e-10
14	8706843	9075379	8990008	A	G	281841	9.521	1.713e-21
14	9566889	9732624	9719871	T	C	249301	6.479	9.248e-11
14	9969196	10765346	10086411	T	C	281841	-6.649	2.953e-11
14	10777763	11388009	10978093	T	G	210313	6.622	3.536e-11
14	11903096	12627449	12142665	A	G	47063	6.227	4.753e-10
14	13406630	13406630	13406630	A	C	57725	-6.216	5.097e-10
14	15364847	15495777	15364847	A	C	204468	-5.703	1.177e-08
14	15963169	15963169	15963169	T	G	281841	-5.655	1.562e-08
14	17702312	17704437	17702312	T	C	281841	-5.64	1.702e-08
14	18985490	18985490	18985490	T	C	60418	-5.468	4.563e-08
14	19557182	19557182	19557182	A	G	275657	5.76	8.397e-09
14	43910271	43910271	43910271	A	G	80497	-12.308	8.155e-35
14	48424012	48553939	48435311	A	T	281841	-6.544	5.972e-11
14	55485336	55602894	55485336	A	G	194229	-5.753	8.743e-09
14	56225103	56576920	56263075	T	G	194229	6.872	6.333e-12
14	61272415	61272415	61272415	T	C	210313	5.788	7.134e-09
14	61490330	61927761	61824641	A	G	195501	-10.962	5.796e-28
14	62164222	62669791	62548721	T	C	194229	11.806	3.642e-32
14	63042333	63526933	63173429	C	G	194229	-15.72	1.111e-55
14	63676440	63723119	63723119	A	G	178386	12.619	1.663e-36
14	64019591	64230926	64230926	T	C	141738	18.617	2.326e-77
14	64263320	65173186	64752983	T	G	142645	-21.245	3.65e-100
14	65283784	65641447	65283784	A	C	140794	20.928	2.98e-97
14	65916772	66585083	66247849	A	T	160207	-11.077	1.614e-28
14	66694451	67231007	67090738	A	G	194229	-13.02	9.412e-39
14	67604188	68062250	67670348	A	T	137386	-11.92	9.279e-33
14	68172475	68325644	68315663	A	G	281841	6.56	5.368e-11
14	68453055	68875064	68870339	T	G	195501	11.046	2.285e-28
14	69628526	70365652	70064193	T	C	195501	10.102	5.428e-24
14	70593248	70929338	70717396	A	G	199281	9.334	1.023e-20
14	71677751	71987325	71787140	A	T	57725	-6.798	1.06e-11
15	15762959	15840559	15774349	C	G	277044	-5.791	6.993e-09
15	25844413	25844413	25844413	T	C	281841	5.476	4.356e-08
15	27817687	28253174	27817687	T	C	262512	6.752	1.462e-11
15	28457941	28466745	28458506	A	G	281841	-5.704	1.171e-08
15	37931067	37931067	37931067	T	C	204468	5.84	5.207e-09
15	39128010	39206156	39174298	A	C	205681	5.878	4.16e-09
15	39844295	39844295	39844295	C	G	262468	-5.844	5.086e-09
15	42049656	42049656	42049656	T	G	274012	5.555	2.779e-08
15	47307090	47330139	47307099	A	G	212614	-5.597	2.178e-08
15	47846812	48368796	47903861	T	C	281841	-6.974	3.08e-12
15	48442011	48795175	48563426	T	C	278408	6.916	4.657e-12
15	49154103	49229910	49154103	A	G	279148	5.714	1.102e-08
15	49623952	49838353	49819270	T	C	274012	-7.239	4.531e-13
15	50570931	50570931	50570931	T	G	210313	-5.584	2.346e-08
15	51007920	51372957	51150935	T	C	281841	9.608	7.377e-22
15	51684814	51765488	51691804	C	G	281841	5.721	1.061e-08
15	52167326	52765586	52265652	T	G	271403	12.217	2.51e-34
15	52768944	53501586	53231303	A	G	178587	12.036	2.3e-33
15	53767920	53767920	53767920	A	G	269156	10.155	3.152e-24
15	54308346	54839393	54365710	T	C	238221	7.72	1.16e-14
15	55080808	55226191	55226191	A	T	281841	-6.32	2.608e-10
15	55249415	56047162	55732593	A	G	249907	7.497	6.539e-14
15	61676630	61676630	61676630	A	G	17769	5.61	2.017e-08
15	63382615	63592731	63382615	T	C	17769	-5.77	7.948e-09
15	64777807	65017112	64953683	A	T	279705	-7.418	1.19e-13
15	73957222	73959472	73957297	A	G	281841	5.587	2.312e-08
15	75800161	76305960	76287194	A	T	281841	6.25	4.117e-10
15	76825562	76826967	76826967	A	G	281841	-5.587	2.312e-08
16	847311	1170661	1115128	A	G	137035	6.521	7.006e-11
16	1784784	1791556	1790685	A	G	224021	-16.37	3.13e-60
16	3023672	3098204	3098204	A	G	281841	6.028	1.659e-09
16	6527200	6733675	6733675	T	C	281841	6.544	5.973e-11
16	24815723	25195307	24815723	A	G	281841	-6.439	1.199e-10
16	29415100	30233417	29787498	A	G	281841	-6.771	1.279e-11
16	40335335	40366257	40366257	A	G	281841	-5.987	2.143e-09
16	41356090	41359852	41356090	A	C	270860	5.492	3.984e-08
16	64226427	64242565	64230598	A	G	281841	-6.508	7.638e-11
16	65260252	65266043	65260252	T	C	281841	-5.512	3.551e-08
16	66214002	66289262	66249624	A	G	281841	-10.434	1.743e-25
16	66782113	66785250	66785250	A	G	281841	-6.003	1.94e-09
16	77215046	77231179	77222938	C	G	87194	-7.818	5.385e-15
16	79945662	79945662	79945662	T	C	57725	-5.956	2.577e-09
17	46158088	46173455	46173455	T	C	281841	-5.525	3.288e-08
17	54036440	54159546	54060473	C	G	281841	-8.311	9.518e-17
17	60416442	60422142	60416442	T	C	270155	5.92	3.215e-09
17	64017702	64017702	64017702	T	C	73103	-6.621	3.556e-11
17	65324483	65768228	65346770	T	G	280196	-7.282	3.283e-13
17	65855158	66134852	65855158	T	C	228439	6.529	6.64e-11
17	67053818	67448893	67097909	A	G	204468	-5.527	3.263e-08
17	67976610	67989228	67989228	C	G	205721	-5.601	2.136e-08
18	2169335	2180057	2175833	A	G	274012	5.92	3.213e-09
18	6719002	6721743	6719002	A	C	281841	-5.656	1.554e-08
18	14865243	14865243	14865243	C	G	39114	-6.435	1.232e-10
18	18258983	18299716	18258983	T	C	281841	6.295	3.073e-10
18	44129671	44256836	44129671	T	C	106975	-5.646	1.646e-08
18	45743938	45749277	45749277	C	G	232547	-6.04	1.542e-09
18	46536647	46557521	46544056	A	G	249301	-5.654	1.563e-08
18	55054796	55270366	55270366	T	C	74435	-5.743	9.28e-09
18	57152733	57623004	57152742	A	G	35628	-6.524	6.828e-11
18	59099743	59099743	59099743	A	G	19002	6.348	2.185e-10
18	63465648	63465648	63465648	T	C	58339	-5.802	6.557e-09
19	7835850	8282265	8077810	A	G	281841	-6.518	7.142e-11
19	8649033	8657931	8649033	A	G	281841	-6.063	1.332e-09
19	9197882	9229766	9212714	A	G	281841	-10.348	4.265e-25
19	9723838	9772950	9747126	T	C	204468	5.796	6.805e-09
19	9842648	10277276	10273764	A	C	274012	-7.428	1.105e-13
19	12838804	12962339	12848315	T	C	281841	-6.936	4.024e-12
19	22666541	22666541	22666541	T	C	281841	5.55	2.857e-08
19	25103752	25103752	25103752	A	C	74110	-5.47	4.51e-08
19	25996193	26014351	25996193	T	C	207161	-6.175	6.629e-10
19	26048298	26652718	26514648	T	C	281841	7.74	9.941e-15
19	30823686	30846039	30828720	C	G	280196	-5.543	2.978e-08
19	32711669	32715800	32711669	A	G	278060	5.885	3.982e-09
19	33176438	33292383	33286794	A	G	281841	-6.575	4.859e-11
19	37889644	38168260	38045433	C	G	207161	5.942	2.816e-09
19	40174065	40297777	40186178	C	G	280628	-7.211	5.54e-13
19	40700551	40774176	40774176	T	C	275657	-6.541	6.119e-11
19	41431806	41766198	41709635	A	G	281841	-6.79	1.118e-11
19	42238476	42459120	42268909	A	G	281841	12.269	1.332e-34
19	42808154	42954002	42828807	C	G	281841	-7.102	1.226e-12
19	43525595	43842680	43734373	A	T	204610	5.661	1.507e-08
19	45302455	45302654	45302654	T	C	281841	5.671	1.423e-08
19	50726518	51517943	51224240	C	G	242296	-6.389	1.665e-10
19	51742065	51797454	51797454	A	G	204468	5.541	3.011e-08
19	53627939	53629462	53627939	T	C	281841	5.493	3.956e-08
19	54344529	54344529	54344529	T	C	281841	5.795	6.817e-09
19	54534520	54941740	54919611	A	G	281841	-6.153	7.594e-10
19	55799119	55897491	55799119	A	G	281841	5.669	1.434e-08
19	55985139	56527735	56477209	A	G	275657	-6.763	1.356e-11
19	60089239	60245279	60245279	A	T	278689	-6.487	8.757e-11
19	60810003	60908129	60898010	T	C	281841	-8.82	1.147e-18
20	232100	241601	236570	A	G	242087	-7.341	2.112e-13
20	9803106	9992038	9992038	A	T	278983	-5.547	2.906e-08
20	10455022	10954451	10933150	A	G	236994	-6.129	8.836e-10
20	12713578	12749185	12744850	A	G	281841	-5.979	2.242e-09
20	23065453	23566672	23111981	A	C	281841	6.094	1.1e-09
20	24442263	25118833	24892426	G	GTATGTA	188184	-7.17	7.486e-13
20	25582086	25619526	25619526	T	C	237080	6.481	9.13e-11
20	25861541	26817933	26317976	A	G	204468	-7.602	2.925e-14
20	26818279	27295155	26818279	T	C	281841	7.115	1.117e-12
20	27458247	27688504	27688504	A	T	206785	6.92	4.512e-12
20	27701125	28685038	28196030	T	C	263971	8.214	2.14e-16
20	28804867	28876481	28869071	T	G	205627	7.951	1.846e-15
20	29276245	29529778	29377582	A	G	281841	10.827	2.562e-27
20	29934646	30552183	30100289	T	G	227066	-15.309	6.694e-53
20	30608377	30629800	30629800	T	C	240160	-11.714	1.081e-31
20	30733060	31374363	31130641	A	G	170124	19.043	7.481e-81
20	31888449	32103408	31888449	A	T	281841	-31.306	3.91e-215
20	32441962	33084375	32601926	T	C	144192	-16.966	1.474e-64
20	33131550	33876947	33439873	T	G	230218	-16.084	3.323e-58
20	34009565	34169791	34156754	A	G	275367	16.013	1.038e-57
20	34673923	35318526	34831410	A	G	204468	10.924	8.839e-28
20	35335434	36130725	35644090	A	C	204468	-10.26	1.067e-24
20	36148090	36838717	36620512	T	C	258977	9.708	2.781e-22
20	37158004	37380511	37158004	T	G	250370	-7.682	1.563e-14
20	37675948	37711932	37711932	T	C	281841	-5.833	5.447e-09
20	37787008	38545167	38251815	A	AG	268637	-6.93	4.211e-12
20	38597198	39075569	39049255	A	C	275309	-8.303	1.011e-16
20	39983222	39983222	39983222	T	C	281841	5.763	8.253e-09
21	4098536	4098536	4098536	T	G	80497	6.111	9.886e-10
21	39751317	39751317	39751317	A	G	204468	-5.509	3.618e-08
21	40561589	41251250	40876707	T	C	268510	7.245	4.321e-13
21	41445896	42011745	41619286	T	C	207161	-5.9	3.645e-09
21	46620478	46622887	46620478	A	G	57365	-7.588	3.258e-14
21	64161950	64161950	64161950	T	C	281841	5.466	4.595e-08
21	66252534	66252534	66252534	A	G	281841	-6.552	5.674e-11
21	67026936	67026936	67026936	A	G	281841	-6.265	3.72e-10
22	25016	56977	25016	T	C	93701	11.561	6.49e-31
22	45128307	45128307	45128307	A	C	73489	-5.564	2.633e-08
22	47842088	47946220	47852801	C	G	281841	6.56	5.367e-11
23	13825137	14083440	14077080	A	G	201035	-5.742	9.355e-09
23	14713049	14713049	14713049	A	C	186458	7.323	2.434e-13
23	15309020	15568008	15316237	C	G	197955	6.532	6.487e-11
23	15670253	16517720	16076270	C	G	143805	-7.3	2.872e-13
23	16748647	16748647	16748647	T	C	279705	-5.473	4.415e-08
23	16839261	17747108	17313076	T	C	197732	8.78	1.628e-18
23	17828257	18320374	17828257	C	G	203728	-7.223	5.067e-13
23	18688449	19152160	18912953	A	G	192068	7.602	2.918e-14
23	19500099	19560721	19560721	A	G	194761	6.185	6.213e-10
23	19884924	20303605	20103535	T	G	206880	6.563	5.263e-11
23	20626921	20647964	20647964	A	G	252624	-5.803	6.515e-09
23	20944332	21846860	21352747	A	T	194761	-7.128	1.019e-12
23	21886351	22077136	21886351	C	G	187079	6.65	2.928e-11
23	27640921	27654718	27654718	A	C	202012	-6.084	1.172e-09
23	28223621	28223621	28223621	T	C	281841	-5.963	2.473e-09
23	28560797	29119572	28790537	A	G	278689	-7.922	2.336e-15
23	29342192	29797932	29520107	A	G	254539	7.243	4.388e-13
23	30055467	30547810	30366132	A	C	274012	7.083	1.412e-12
23	30670508	31582769	31087604	A	G	281841	-9.517	1.787e-21
23	31587956	31697390	31601636	T	C	241177	8.244	1.668e-16
23	32137293	32348534	32137293	A	G	197062	6.53	6.558e-11
23	32844743	32887202	32863031	A	G	241530	-5.857	4.708e-09
23	34420626	34422129	34420662	T	C	236402	5.539	3.037e-08
23	38433342	38444364	38437135	C	G	280196	5.759	8.477e-09
23	45552964	46051101	46051101	A	C	226437	-5.961	2.507e-09
23	48093838	48229218	48110392	A	G	281841	-5.946	2.754e-09
23	49641896	50248274	49763735	C	G	275657	6.457	1.066e-10
23	50274826	50742733	50319280	A	G	278408	6.145	7.981e-10
23	51069239	51472781	51256558	A	G	281841	10.366	3.54e-25
23	51773701	51939175	51779600	T	C	281841	-6.632	3.322e-11
23	52355435	52355816	52355816	A	C	281841	-5.994	2.043e-09
24	24513880	24654044	24579324	G	GTT	157791	-5.97	2.367e-09
24	25168559	25350941	25241689	A	G	281841	6.095	1.096e-09
24	26925541	27175719	27032415	A	G	190726	-6.051	1.438e-09
24	28234321	28404795	28404795	A	G	197955	-5.966	2.428e-09
24	28873975	28873975	28873975	T	C	189986	-5.453	4.965e-08
24	31284049	31287579	31284049	A	G	256802	5.6	2.142e-08
24	31298531	31793063	31789244	T	G	281841	-6.194	5.882e-10
24	32610041	33062707	33058719	A	G	228573	-5.644	1.658e-08
24	34577805	34682034	34594118	A	G	271041	-6.829	8.577e-12
24	58290168	58736798	58301200	A	G	281841	-7.192	6.396e-13
24	58821060	58821060	58821060	T	G	193525	-5.556	2.754e-08
24	59649995	59649995	59649995	T	C	239684	-5.502	3.761e-08
24	60224861	60782736	60338175	T	C	281841	-7.733	1.048e-14
24	61474884	61504360	61474884	A	G	281841	-8.431	3.424e-17
25	849761	1278638	899078	T	G	34851	7.174	7.269e-13
25	1551386	1573358	1573358	T	C	27408	-6.909	4.864e-12
25	2458252	2505824	2505824	C	G	22821	-6.246	4.206e-10
25	3726093	3774062	3769191	C	G	25973	-5.911	3.397e-09
25	24523849	24523849	24523849	A	G	83649	-8.92	4.682e-19
25	25927928	26522063	26049578	T	C	278983	-6.863	6.739e-12
25	26835509	27113381	27069122	A	G	275657	-7.144	9.073e-13
25	33597384	33657964	33637951	A	C	281841	5.908	3.459e-09
25	34411881	34411881	34411881	A	G	199135	-5.536	3.093e-08
25	35307550	35944632	35489066	T	C	281841	7.184	6.78e-13
25	37327730	37445773	37445773	A	G	257888	6.226	4.794e-10
26	9797363	10226378	10117877	T	C	281841	6.148	7.831e-10
26	11684714	11979755	11695799	T	C	262326	5.666	1.458e-08
26	15317601	15317601	15317601	A	T	57560	6.343	2.252e-10
26	20104927	20104927	20104927	A	C	281841	-5.765	8.187e-09
26	21277195	21313883	21297875	T	G	275657	-6.357	2.062e-10
26	22521923	23078128	22786698	T	C	274012	-9.692	3.267e-22
26	24310950	24328177	24328177	C	G	281841	-6.148	7.86e-10
26	28954776	28954776	28954776	T	C	245885	5.594	2.213e-08
26	32879628	32879628	32879628	A	G	83190	-7.356	1.894e-13
26	44223400	44305266	44226588	T	G	280196	-7.128	1.015e-12
26	45340065	45340065	45340065	T	C	273521	5.515	3.478e-08
27	36442395	36555428	36501710	T	C	281841	13.704	9.562e-43
27	41388877	41770871	41403593	T	C	281841	-6.733	1.665e-11
28	6518357	6735318	6518357	A	C	281841	-6.397	1.586e-10
28	12117792	12117792	12117792	A	G	281841	5.509	3.604e-08
28	15647747	15866962	15852619	A	C	254597	-5.86	4.629e-09
28	16062778	16891755	16411462	A	G	260622	6.184	6.262e-10
28	16947260	16947260	16947260	T	C	206880	5.699	1.209e-08
28	17928206	18067352	18067352	A	G	281841	-7.968	1.606e-15
28	18583595	18597601	18588283	T	C	278689	-13.268	3.557e-40
28	19615208	19615218	19615208	T	G	193525	-5.865	4.49e-09
28	20306258	20697515	20306258	T	C	281841	5.702	1.185e-08
28	35198094	35662703	35625204	T	C	280196	-5.838	5.296e-09
29	9486040	9553532	9515475	T	C	281841	-9.801	1.12e-22
29	10017066	10259383	10254645	T	C	281841	-6.135	8.514e-10
29	26124899	26359177	26359177	A	G	281841	5.893	3.801e-09
29	27958273	28086383	28086383	T	C	239420	6.182	6.316e-10
29	28255375	29051270	28615771	A	G	268773	6.835	8.224e-12
29	29123417	29190766	29123417	A	T	209016	-6.616	3.703e-11
29	29703537	29953105	29714484	A	G	275657	-9.692	3.263e-22
29	30413762	30683082	30519880	T	C	204187	-6.305	2.884e-10
29	36917256	36926227	36926227	T	C	242853	5.492	3.968e-08
29	39829964	40177027	40016111	A	G	275657	7.019	2.241e-12
29	40666856	40747787	40678539	T	G	202511	-9.606	7.566e-22
29	41018349	41752002	41281425	T	C	203728	10.837	2.303e-27
29	42009447	42245387	42009447	T	C	220702	-9.956	2.384e-23
29	42721931	43500907	43030995	T	C	201035	9.533	1.53e-21
29	43536407	44035557	43536407	T	C	201035	7.258	3.936e-13
29	44038683	44121061	44041356	T	C	217371	6.252	4.056e-10
29	44442260	44760333	44622162	A	G	260190	-10.1	5.547e-24
29	45137359	45137364	45137364	A	T	210313	-6.516	7.239e-11
29	45318788	45963675	45662635	A	C	257189	-10.676	1.325e-26
29	46344365	46608988	46344365	A	G	232907	-9.695	3.16e-22
29	46916971	47016534	46939537	T	G	200648	-6.484	8.94e-11
29	48544332	48909325	48909325	A	G	197955	7.391	1.462e-13
29	49343176	49659402	49409759	A	T	280628	8.482	2.22e-17
29	49910993	50279902	50171995	A	C	214857	7.175	7.218e-13
29	50632649	50847172	50824398	T	C	203893	-7.67	1.727e-14

## Sheet: SuppTable5b-Meta-GWAS-QTL-FY
Supp Table 5b. Meta-GWAS QTL for fat yield (FY)
chr	start	end	topVariant	effectAllele	otherAllele	nRecords	Zscore	Pvalue
1	22362988	22362988	22362988	T	C	94876	8.86	8.027e-19
1	79960737	79960737	79960737	A	T	199024	-5.491	4.006e-08
1	79987336	80472084	80472084	A	G	196331	5.745	9.2e-09
1	81121614	81121614	81121614	T	C	199411	5.557	2.74e-08
1	81521343	81633674	81633674	A	C	196331	-5.795	6.846e-09
1	89428932	89522993	89435355	A	C	281883	-6.069	1.285e-09
1	89524540	90223796	90024385	G	GATATATGTAT	268679	-6.827	8.658e-12
1	93856274	93856274	93856274	A	C	262850	-5.649	1.616e-08
1	94468280	94468280	94468280	T	C	240121	5.752	8.798e-09
1	94680369	95034860	95034860	A	AC	267520	-6.393	1.624e-10
1	104353268	104373420	104367199	A	G	240548	-5.642	1.684e-08
1	107648865	107742835	107742835	T	C	203241	-6.201	5.621e-10
1	119377468	119513439	119393289	T	C	280095	-5.877	4.188e-09
2	3222668	3772975	3550916	A	G	281883	-6.562	5.32e-11
2	21724366	21985866	21985866	A	G	227651	-6.069	1.29e-09
2	23644002	23678504	23669509	T	G	281883	6.292	3.133e-10
2	45606495	45639466	45606495	T	C	279190	5.589	2.277e-08
2	100818900	100818900	100818900	T	C	259017	5.662	1.499e-08
2	102795115	102795115	102795115	A	G	207615	5.621	1.901e-08
2	103874771	104324379	103874771	A	C	112767	6.066	1.308e-09
2	104551829	104551829	104551829	A	C	258926	-5.836	5.352e-09
2	105093583	105163783	105156379	A	G	281883	-9.806	1.06e-22
2	105690797	106392704	105952702	A	G	211784	6.525	6.808e-11
2	106999357	107449484	107050374	T	C	273889	-8.324	8.474e-17
2	107643422	108301623	107828104	T	C	242257	7.007	2.442e-12
2	108358455	108875051	108405252	A	G	210308	6.591	4.378e-11
2	109037376	109548462	109377030	A	C	278954	-6.581	4.668e-11
2	111493100	111564933	111549449	T	C	273889	6.365	1.952e-10
2	118377466	118392418	118385533	A	G	281883	-5.749	8.99e-09
2	118698957	119163065	119153313	T	C	266363	-6.215	5.14e-10
2	119830664	119903733	119839303	T	C	280095	5.893	3.785e-09
2	125210647	125223742	125219783	T	C	280095	-5.708	1.143e-08
2	126974583	127071112	127044521	T	C	281883	-7.389	1.48e-13
2	132979525	132981273	132979525	T	C	275677	-5.856	4.753e-09
3	7216040	7421637	7421637	A	C	281883	6.081	1.195e-09
3	7866256	7951545	7936072	A	G	281883	10.627	2.237e-26
3	9351446	9357238	9353502	T	C	280095	-5.594	2.222e-08
3	13627777	13658511	13627777	T	C	80497	-17.209	2.284e-66
3	15023242	15404099	15396386	T	C	281883	8.098	5.575e-16
3	15932274	15932274	15932274	T	C	249872	-5.469	4.532e-08
3	16144171	16938604	16454289	A	T	205256	6.762	1.358e-11
3	17740509	17740509	17740509	T	C	242030	-5.82	5.879e-09
3	19634359	19659217	19634359	T	C	251932	5.513	3.536e-08
3	21135751	21558052	21159800	A	T	246225	-6.761	1.372e-11
3	28879009	28928261	28902455	T	C	280095	5.979	2.24e-09
3	54107134	54107288	54107134	T	C	278731	5.521	3.364e-08
3	72636387	72703079	72703079	A	G	90536	-6.585	4.537e-11
3	79337232	79337232	79337232	A	T	48029	5.471	4.48e-08
3	87473818	87475641	87475365	C	G	83649	-10.218	1.647e-24
3	93650081	94358623	94008198	T	C	257777	6.592	4.354e-11
3	95211402	95316441	95316441	A	G	249020	6.812	9.64e-12
3	96424671	96424671	96424671	T	C	80497	-6.066	1.307e-09
3	104887690	104896714	104887690	A	G	127555	-9.045	1.498e-19
3	118777972	118829173	118812337	T	C	234954	-5.687	1.296e-08
3	120151996	120872148	120381727	A	G	269646	7.695	1.412e-14
3	120882135	120993759	120948177	A	C	177883	6.402	1.53e-10
4	2040778	2040778	2040778	T	C	83649	-5.967	2.412e-09
4	10207086	10286663	10264556	T	C	280095	6.034	1.601e-09
4	21251258	21251258	21251258	A	G	281883	-5.538	3.056e-08
4	34331471	34336852	34332638	A	G	48029	9.117	7.698e-20
4	40505357	40505357	40505357	T	C	29041	-5.57	2.546e-08
4	47050252	47154040	47062696	T	C	241262	5.639	1.715e-08
4	50915692	51463268	51123788	T	C	207615	-6.218	5.024e-10
4	51518458	51995325	51995325	T	C	254500	6.392	1.641e-10
4	64433532	64433532	64433532	T	C	281883	-5.657	1.536e-08
4	65714996	65718282	65714996	A	G	281883	5.627	1.833e-08
4	77992160	77998488	77992160	A	G	134514	5.469	4.538e-08
4	117292223	117616594	117572738	A	C	275677	-6.514	7.296e-11
5	4691414	4787231	4780725	T	C	223268	6.503	7.894e-11
5	4874543	5484273	5322909	T	C	204463	-6.759	1.387e-11
5	6017402	6039829	6039829	T	C	97217	-8.353	6.648e-17
5	7154035	7713964	7378610	A	G	196331	6.222	4.918e-10
5	7906198	8324574	8323637	T	C	278731	-5.983	2.186e-09
5	8659974	9414375	8960496	T	G	252489	-6.983	2.894e-12
5	9472519	9722169	9722169	C	G	189492	6.475	9.493e-11
5	16387780	16433694	16431853	T	C	278731	5.821	5.865e-09
5	18224378	18224378	18224378	A	T	278731	5.479	4.277e-08
5	20148315	20202081	20194575	A	G	278731	-5.684	1.312e-08
5	39799514	39813783	39799514	A	T	80497	5.729	1.012e-08
5	84152769	84892196	84647493	A	G	278731	-6.92	4.523e-12
5	84918431	85547445	85404369	T	C	278731	7.334	2.235e-13
5	85813261	86064974	86064974	T	C	278731	-7.357	1.878e-13
5	86519916	86934154	86565689	A	G	241138	8.716	2.877e-18
5	87066421	87354203	87091621	T	TG	265527	-7.16	8.083e-13
5	87524754	87943859	87854353	T	G	278731	9.07	1.192e-19
5	88394121	88454455	88443940	A	G	278731	17.196	2.834e-66
5	88996449	89387551	89030272	T	C	278731	9.021	1.856e-19
5	89698636	89971922	89952209	A	C	276943	-10.589	3.364e-26
5	90461516	90541101	90533306	T	C	274250	-9.499	2.121e-21
5	91047299	91098691	91047299	A	G	278731	-13.698	1.047e-42
5	91724330	91982959	91956228	A	G	276038	-12.318	7.285e-35
5	92753116	92954598	92787856	T	C	278731	-14.575	4.045e-48
5	93514509	93525079	93516319	A	G	220747	28.039	5.48e-173
5	94108755	94254338	94108755	A	G	278731	12.705	5.519e-37
5	94616075	94782843	94762229	T	G	278731	7.506	6.084e-14
5	94953165	95296928	95295336	A	G	278731	10.551	5.032e-26
5	95872353	96093209	96036100	T	C	207156	-8.928	4.319e-19
5	96261437	96721651	96689583	A	C	278731	-9.203	3.489e-20
5	97238126	97238126	97238126	A	ATTTCACTGTTTCCACTTCCTTCCTTCCTTCTC	17900	-6.282	3.345e-10
5	97617845	97763562	97763562	T	G	278731	8.717	2.856e-18
5	98338188	98611130	98584364	T	C	277590	-6.053	1.423e-09
5	99671405	99715083	99671405	A	T	26032	-5.54	3.025e-08
5	103338258	103791369	103691453	C	G	270737	-6.309	2.802e-10
5	107884485	107884485	107884485	T	G	246225	-5.486	4.118e-08
5	108168398	108640539	108529994	T	C	272525	-6.072	1.261e-09
5	109868893	109913499	109913499	A	G	257005	5.494	3.931e-08
5	110436410	110474592	110474592	A	G	72997	5.655	1.561e-08
5	111317437	111317437	111317437	T	C	278731	6.138	8.341e-10
5	111797634	111947892	111913383	C	G	278731	-11.708	1.163e-31
6	36241100	36241100	36241100	T	G	213894	-5.528	3.238e-08
6	36361138	36999569	36808072	T	G	136110	6.819	9.195e-12
6	40535343	40750541	40750541	T	C	124904	-5.618	1.932e-08
6	84048792	84048792	84048792	A	G	281883	5.651	1.597e-08
6	85812545	85817207	85812545	T	C	281883	-5.715	1.094e-08
6	86375235	86442746	86412055	A	G	281883	7.372	1.675e-13
6	86940863	87272632	86986115	T	G	280742	-12.039	2.224e-33
6	87526289	87602542	87602542	A	G	52668	6.073	1.255e-09
6	88377783	88377783	88377783	A	C	207156	-5.495	3.909e-08
6	88386192	88900372	88882609	A	G	266363	-5.657	1.545e-08
6	111688769	111688769	111688769	A	G	83649	5.978	2.264e-09
7	18150069	18150069	18150069	T	G	236969	-5.597	2.183e-08
7	28541086	28541086	28541086	G	GT	194411	-5.462	4.713e-08
7	28714724	29180255	29180255	A	G	204463	-5.803	6.506e-09
7	40357907	40373434	40357907	T	C	257777	5.948	2.722e-09
7	43693932	44052110	43693932	A	G	272525	-7.137	9.543e-13
7	44370188	44370188	44370188	A	T	247485	-5.503	3.725e-08
7	69135975	69148328	69148328	T	C	196953	5.895	3.756e-09
7	95683952	96248253	95814127	C	G	281883	7.022	2.195e-12
7	96329130	96338112	96338112	C	G	281883	-5.576	2.459e-08
7	96875174	96875174	96875174	A	T	80497	-7.566	3.858e-14
8	9520431	9520431	9520431	A	ACACTTGT	92885	-6.176	6.563e-10
8	82154831	82287985	82184404	T	C	280095	7.25	4.179e-13
8	84486998	84507060	84507060	A	G	281883	5.592	2.243e-08
8	84675908	85111365	85051433	A	T	281883	6.258	3.897e-10
8	88022841	88105812	88056272	T	TAGTC	268679	6.782	1.188e-11
8	102533064	102533064	102533064	A	T	281883	-5.495	3.902e-08
9	11853012	11866886	11866886	T	C	132897	-7.587	3.286e-14
9	47303497	47303497	47303497	A	C	80497	-8.203	2.349e-16
9	47833051	47833051	47833051	T	G	122687	5.716	1.088e-08
9	51662558	51662558	51662558	A	AT	80497	-6.13	8.772e-10
9	52917589	52935822	52917589	T	G	83190	6.659	2.749e-11
9	85990061	86009540	86009540	A	G	281883	5.845	5.056e-09
9	88050354	88254314	88246620	T	C	272007	-5.692	1.254e-08
9	89055809	89055809	89055809	T	C	281883	5.507	3.651e-08
9	100456861	100467721	100462591	T	C	249377	-5.688	1.289e-08
10	13147426	13147426	13147426	C	G	203628	5.498	3.851e-08
10	14591752	14619767	14591752	A	T	230523	-5.742	9.35e-09
10	46384772	46548638	46424827	A	G	280095	7.214	5.434e-13
10	50773182	50797559	50773182	CCAT	C	268679	-6.166	7.004e-10
10	65985415	65993499	65993499	T	C	50722	-5.681	1.343e-08
10	92448426	92495499	92467921	T	C	281883	6.434	1.245e-10
11	587160	587160	587160	A	G	106433	-5.69	1.274e-08
11	13779994	13886282	13792896	T	C	268744	-7.544	4.569e-14
11	19139371	19142563	19142563	T	C	281883	-5.901	3.612e-09
11	24592893	24592893	24592893	G	GT	267538	-5.529	3.229e-08
11	77827054	77869971	77827054	T	C	281883	6.076	1.235e-09
11	87545219	87635379	87611279	T	C	281883	6.325	2.528e-10
11	99117169	99137158	99117169	A	G	275677	5.504	3.71e-08
11	101327333	101327333	101327333	A	G	281883	5.59	2.276e-08
11	101498972	101978369	101922216	T	C	280095	7.349	1.997e-13
11	102597526	102764220	102599440	A	G	277572	-6.242	4.32e-10
11	103242691	103277147	103276218	T	TA	268679	-11.729	9.043e-32
11	103910326	104186734	104172456	G	GA	268679	-7.021	2.207e-12
11	104829610	104829610	104829610	T	C	241383	5.781	7.424e-09
11	105063197	106053080	105560811	T	G	225499	-6.579	4.733e-11
11	106194029	106297474	106297474	T	C	227287	-5.667	1.453e-08
12	9812208	9812208	9812208	T	C	80497	15.175	5.185e-52
12	18159875	18491931	18159875	T	C	280095	-5.643	1.671e-08
12	19540878	19743236	19559513	A	G	281883	-5.656	1.55e-08
12	20574660	20960985	20574660	A	G	233857	-5.487	4.098e-08
12	22907318	22907318	22907318	A	G	281883	-5.651	1.598e-08
12	24814618	25164383	25029592	T	G	239662	-6.154	7.551e-10
12	25650455	25661893	25650455	T	C	257562	-5.6	2.138e-08
12	26259109	26358827	26354335	A	G	239662	5.802	6.569e-09
12	26913496	26913496	26913496	A	G	281883	-5.601	2.127e-08
12	35629209	35744357	35651101	G	GAAT	266891	-5.685	1.305e-08
12	45699233	45896999	45777390	T	C	98397	7.278	3.377e-13
12	69285608	69772451	69646543	A	G	249377	6.763	1.348e-11
12	72948119	73289816	73006210	T	G	212368	7.46	8.631e-14
12	73567803	74020496	73681596	T	C	223135	6.182	6.315e-10
12	75193072	75215219	75210448	T	C	281883	7.437	1.032e-13
13	15840042	15840042	15840042	T	C	281883	5.489	4.044e-08
13	22143310	22143310	22143310	A	G	281883	-5.604	2.091e-08
13	35086816	35086816	35086816	A	G	281883	-5.513	3.531e-08
13	35727381	36194696	35727381	T	G	281883	6.182	6.346e-10
13	36687168	36687168	36687168	T	G	273889	-5.475	4.374e-08
13	43097950	43097950	43097950	T	C	80497	-9.06	1.304e-19
13	44477729	44477729	44477729	A	C	181489	17.721	2.881e-70
13	53714383	53714383	53714383	A	G	276943	5.483	4.19e-08
13	54648560	54648560	54648560	T	C	280095	5.48	4.26e-08
13	57763734	57763734	57763734	A	G	281883	5.457	4.852e-08
13	62501428	62600313	62590085	C	G	208315	5.599	2.152e-08
13	77463249	77463249	77463249	A	G	281883	-5.821	5.854e-09
13	78267843	78267843	78267843	T	C	275677	5.468	4.544e-08
14	384242	700722	575036	A	AGATACAACT	151723	75.032	3.47e-1225
14	1076706	1148972	1076706	A	G	156889	36.708	5.46e-295
14	1175645	1760890	1664837	T	C	154196	42.854	3.03e-401
14	2171060	2302055	2230926	CA	C	237659	-27.813	3e-170
14	2743719	2819042	2781914	C	G	275677	17.664	7.919e-70
14	2827839	3545900	3325343	A	G	275677	17.668	7.372e-70
14	3829221	4063887	3829221	C	G	281883	14.453	2.386e-47
14	4585509	4639698	4595259	G	GCATGGGT	268679	13.235	5.52e-40
14	5124947	5782719	5292743	A	G	206833	9.953	2.457e-23
14	5873746	6162538	5971101	A	AAT	268679	-8.61	7.282e-18
14	6649338	6896917	6663541	A	T	239662	11.034	2.608e-28
14	7168953	7244034	7187087	T	G	280095	-8.239	1.736e-16
14	7495882	7769980	7762243	A	G	222435	10.397	2.566e-25
14	8281855	8411248	8319506	A	G	207156	5.866	4.475e-09
14	8918443	9317752	8918443	T	C	210308	8.528	1.485e-17
14	9419119	9868248	9455868	T	C	196331	-7.326	2.369e-13
14	9971759	10853919	10415552	T	C	258926	-6.277	3.458e-10
14	10933720	11315502	10933720	T	C	136218	-6.059	1.367e-09
14	11469981	11933930	11914931	T	C	210308	-6.007	1.892e-09
14	11941144	12895386	12435841	A	G	60413	6.171	6.796e-10
14	13239565	13464047	13447995	T	C	205858	6.016	1.789e-09
14	14021657	14108282	14037019	C	G	228200	-6.236	4.49e-10
14	14349808	14642106	14636751	A	G	255641	-6.32	2.611e-10
14	15322091	15762307	15663368	T	C	275677	6.273	3.532e-10
14	16792820	16991866	16952796	T	G	275677	5.543	2.967e-08
14	18830580	18861139	18830580	A	G	252489	5.622	1.889e-08
14	35328444	35391599	35328444	T	TG	266891	5.588	2.294e-08
14	43910271	43910271	43910271	A	G	80497	-22.763	1.06e-114
14	63526933	63723119	63623607	A	G	234475	6.158	7.384e-10
14	64433148	64441864	64434586	T	C	222783	-5.92	3.212e-09
14	65149663	65916772	65470871	T	C	213434	-6.373	1.856e-10
14	66005158	66005158	66005158	A	G	199276	5.688	1.287e-08
14	67348828	67548360	67548360	A	G	269056	-5.954	2.615e-09
15	1527836	2147991	1681788	CT	C	266062	-6.453	1.096e-10
15	3322261	3402960	3322261	T	C	209751	-5.615	1.969e-08
15	8471639	8482688	8479896	A	T	80497	5.707	1.148e-08
15	22535993	22953733	22535993	T	C	80497	-5.928	3.074e-09
15	58603221	58603221	58603221	A	C	281883	-5.615	1.969e-08
15	59921793	59941214	59925428	T	G	226420	-5.92	3.223e-09
15	60449496	60797067	60450517	A	G	279190	-7.148	8.78e-13
15	61466470	61744536	61482966	A	G	281883	-6.891	5.554e-12
15	61991226	62363764	62039246	T	C	249377	-6.445	1.156e-10
15	63018363	63436659	63125037	C	G	262538	-7.451	9.275e-14
15	64550073	64557071	64557071	G	GA	266891	5.976	2.29e-09
15	65278877	65333701	65299022	T	C	281883	-8.503	1.854e-17
15	73251572	73344462	73344462	T	G	281883	6.154	7.564e-10
15	73919606	73958744	73957271	CA	C	268679	8.89	6.11e-19
15	74858173	74858173	74858173	T	C	96609	-6.555	5.579e-11
16	50230595	50313127	50231834	T	G	279190	-7.119	1.084e-12
16	65345117	65347828	65347828	CT	C	265986	-6.144	8.072e-10
16	66214002	66288211	66248628	T	TAG	265986	-10.2	1.99e-24
16	67350051	67350051	67350051	A	C	255084	5.459	4.794e-08
16	77215087	77231179	77223248	A	G	103449	13.307	2.118e-40
17	34135010	34213651	34211944	T	C	281883	-7.605	2.849e-14
17	51724044	51737575	51737575	T	C	96609	-6.986	2.823e-12
17	53901189	54267102	54120518	A	G	280095	-6.875	6.188e-12
17	65329849	65345324	65331276	T	C	281883	-5.562	2.663e-08
17	68904456	69241770	69210152	T	C	281883	-6.649	2.959e-11
17	72059652	72171497	72160566	A	G	275677	7.034	2.008e-12
17	72928730	73083293	72928730	T	C	275677	-6.023	1.711e-09
18	6517900	6662208	6591133	T	C	239662	6.392	1.632e-10
18	10897314	11034805	11007010	A	G	234862	-5.63	1.801e-08
18	13548838	13930356	13594368	C	G	78794	6.249	4.141e-10
18	18258983	18344573	18258983	T	C	281883	6.481	9.095e-11
18	26977965	26981952	26977965	T	C	122425	-8.188	2.66e-16
18	57405476	57623004	57574852	A	G	19002	7.252	4.102e-13
18	58103805	58178218	58178218	T	TG	229610	-6.19	6.021e-10
18	59099743	59099743	59099743	A	G	19002	7.758	8.612e-15
19	10446348	10446348	10446348	A	AT	268679	-5.453	4.955e-08
19	18048860	18108837	18108837	A	T	37558	5.903	3.573e-09
19	24011078	24021678	24016799	T	G	226136	6.049	1.462e-09
19	25528232	25562325	25528232	T	C	121666	5.953	2.636e-09
19	25983234	26121351	26077540	C	G	257777	6.202	5.572e-10
19	26314086	26929612	26652718	A	G	204463	-6.726	1.747e-11
19	27553842	28052284	27558658	A	G	273902	6.326	2.51e-10
19	28065254	28275344	28154933	T	C	241597	5.922	3.185e-09
19	32604383	32618929	32618929	A	G	236550	-6.005	1.917e-09
19	33881713	33881713	33881713	A	C	247589	-5.512	3.558e-08
19	34297289	34669255	34589006	A	G	281883	-7.012	2.354e-12
19	41360372	41833617	41831986	A	G	275677	-5.731	1e-08
19	42902117	42911989	42911989	T	C	281883	5.778	7.543e-09
19	44791701	44791701	44791701	A	G	281883	5.802	6.563e-09
19	45302455	45455811	45386046	A	G	240121	-5.717	1.083e-08
19	45786480	46147281	45978134	A	C	277959	-5.899	3.666e-09
19	46826348	47550574	47060331	T	G	202104	-6.798	1.061e-11
19	47901973	48314549	48203950	A	G	280742	-6.255	3.973e-10
19	48834910	49389643	49155082	A	G	281883	7.245	4.327e-13
19	49660479	50198903	49953719	A	G	210308	8.671	4.269e-18
19	50695215	50778060	50705283	T	TC	268679	-14.517	9.513e-48
19	51230394	51304126	51304126	T	C	207615	8.38	5.307e-17
19	52103333	52126440	52108052	T	G	281883	5.769	7.951e-09
19	53778864	53846546	53836544	T	C	281883	-5.852	4.867e-09
19	55570100	56158856	55661943	T	C	203628	6.336	2.355e-10
19	56180609	56332489	56185715	T	C	203800	5.724	1.043e-08
19	56475130	56954703	56954703	A	G	243973	-5.889	3.88e-09
19	60555653	60559114	60557681	T	C	281883	5.689	1.28e-08
19	60816145	61173729	61172811	A	C	280742	6.108	1.012e-09
19	62752629	62800443	62756197	T	G	280742	-6.577	4.795e-11
20	2083183	2318143	2318143	A	G	246297	-5.664	1.475e-08
20	3015923	3133766	3015923	A	G	281883	-6.685	2.307e-11
20	4657439	5000086	4854878	C	G	262850	-7.777	7.448e-15
20	6410121	6410121	6410121	A	G	105731	-8.729	2.559e-18
20	18107790	18137700	18137700	T	C	281883	-5.747	9.065e-09
20	25000851	25254754	25254754	A	G	281883	5.639	1.714e-08
20	29941368	30226141	29980486	A	G	257777	6.035	1.594e-09
20	30313957	31230894	30733060	A	G	194424	-6.74	1.581e-11
20	31233558	31374363	31275486	T	C	228089	-6.574	4.885e-11
20	31888449	32103408	31888449	A	T	281883	11.694	1.374e-31
20	32388576	32667181	32426457	A	G	281883	-8.772	1.757e-18
20	32937915	33048317	32990298	A	C	273889	-6.646	3.013e-11
20	33492651	33492651	33492651	C	G	278169	-6.402	1.539e-10
20	34993302	35233378	34993302	C	G	205104	-6.025	1.696e-09
20	35684396	35811493	35698599	A	C	230427	5.667	1.453e-08
20	36347474	36389554	36350684	A	G	280095	5.921	3.193e-09
20	38357374	38676209	38587612	A	G	281883	7.792	6.581e-15
20	67764430	68020080	67764430	A	G	281883	5.981	2.221e-09
21	4098536	4098536	4098536	T	G	80497	12.096	1.112e-33
21	64323113	64324452	64323113	T	C	281883	5.986	2.15e-09
21	65903374	66381001	66342938	A	G	281883	-6.515	7.274e-11
22	25016	56977	25016	T	C	93701	-9.299	1.424e-20
22	48684587	48816881	48684587	A	ATGGAGTGGGTTGCCATTTCCTTCTCCAATGCATGAAAGTGAAAAGTGAAAGGGAAGTCGCTCAGTCGTGTCCGACTCATAGCGACCCCATGGACTGCAGCCAACCAGGCTCCTCCATCCATGGGATTTTCCAGGCAAGAGTAC	266891	5.531	3.191e-08
22	50191952	50561646	50561646	C	G	279747	-5.881	4.075e-09
22	57946376	57946376	57946376	C	G	281883	6.384	1.726e-10
22	59714055	60063229	59958223	A	C	281883	6.789	1.128e-11
22	60598567	60630297	60615753	A	G	281883	9.61	7.235e-22
23	14637634	14651576	14637634	T	C	246564	5.65	1.603e-08
23	15328942	15380906	15332074	A	G	280724	7.753	8.961e-15
23	24412076	24412076	24412076	T	C	265771	-5.678	1.361e-08
23	25314051	25804118	25712582	A	G	264211	-6.924	4.396e-12
23	26555478	26988566	26978805	T	C	281883	7.37	1.708e-13
23	27014007	28004242	27507585	T	C	281883	7.736	1.024e-14
23	28022223	28293628	28212294	A	T	280742	7.36	1.838e-13
23	28402329	28934652	28799398	T	C	273889	-8.975	2.822e-19
23	29398007	29786894	29748265	A	G	203347	5.731	9.987e-09
23	30157775	30777758	30364063	A	G	273889	-6.99	2.74e-12
23	31386480	31386480	31386480	T	C	270737	5.632	1.783e-08
23	40429686	40916615	40460826	T	C	281883	6.293	3.119e-10
23	44263997	44289267	44289267	C	G	281883	5.886	3.95e-09
25	875286	1573358	1270205	T	C	34982	6.635	3.246e-11
25	2461761	2775404	2493189	T	G	273889	5.87	4.348e-09
25	16442047	16712194	16507561	A	C	240639	-8.152	3.566e-16
25	24523849	24523849	24523849	A	G	83649	-14.372	7.785e-47
25	26167798	26299397	26187314	T	C	244896	-6.018	1.761e-09
25	26926449	27479378	26992537	A	G	281883	6.658	2.773e-11
25	27493934	27588853	27552300	A	G	212524	5.905	3.518e-09
25	28053364	28230677	28163620	T	C	228917	6.304	2.91e-10
25	33466287	33651137	33648512	T	C	280095	5.699	1.206e-08
25	35636588	35783104	35739825	A	G	281883	-7.233	4.714e-13
26	9848203	10160365	10108802	A	G	278731	-6.328	2.478e-10
26	11531211	11752083	11531211	T	C	281883	-5.674	1.393e-08
26	13221856	13648685	13221856	C	G	273889	5.614	1.972e-08
26	14491048	14769909	14769909	T	C	281883	-5.84	5.217e-09
26	15287913	16212641	15716249	A	G	195034	-6.671	2.548e-11
26	16237003	16237003	16237003	T	C	197950	5.592	2.247e-08
26	16314509	16813833	16763262	A	G	281883	-6.308	2.819e-10
26	18200180	18234812	18234617	A	G	281883	6.548	5.843e-11
26	18995349	19126197	19119209	T	C	249997	-6.342	2.27e-10
26	19358794	19447562	19371132	A	C	242814	-5.914	3.345e-09
26	20492026	20750773	20627365	A	G	281883	8.527	1.503e-17
26	21267450	21343299	21272422	T	C	281883	11.63	2.911e-31
26	21772978	22131518	21910395	A	T	265204	8.069	7.076e-16
26	22672550	22672550	22672550	A	G	182533	5.769	7.954e-09
26	22821523	23255377	23222425	T	G	280095	6.048	1.467e-09
26	32879628	32879628	32879628	A	G	83190	-14.783	1.895e-49
26	38889039	39215759	38889039	T	G	240121	6.322	2.575e-10
26	39476508	39504597	39480879	A	G	259903	6.084	1.17e-09
26	39725153	40529604	40066684	C	G	269832	6.413	1.426e-10
26	43732154	43732154	43732154	A	G	263983	5.54	3.026e-08
26	45490371	45492562	45490371	T	C	258588	-5.596	2.198e-08
27	27814916	27863378	27863378	A	G	96609	-6.477	9.364e-11
27	36466414	36555428	36515429	G	GAT	268679	15.087	1.975e-51
27	37181368	37181368	37181368	CAAATCAAATGTGCCTTTTAGA	C	266891	-5.552	2.822e-08
27	41388877	41542268	41407407	G	GA	268679	9.032	1.688e-19
28	15852619	15867663	15866962	T	C	248374	6.521	7.007e-11
28	17371589	17372220	17372083	T	C	281883	-5.669	1.44e-08
28	17760141	18067352	18067352	A	G	281883	-7.122	1.067e-12
28	18577641	18597601	18588283	T	C	278731	-10.455	1.397e-25
28	19615218	19615218	19615218	T	G	193520	5.532	3.166e-08
28	20735065	20735739	20735739	T	G	279190	-5.895	3.749e-09
28	23578701	23578701	23578701	T	C	281883	-5.566	2.614e-08
28	28696766	28799246	28799150	T	C	238690	-6.31	2.782e-10
28	28894078	29634501	29326475	A	G	281883	-6.755	1.431e-11
28	32403198	32411655	32411655	A	G	281883	5.566	2.613e-08
28	34235870	34648511	34624640	T	C	281883	-7.172	7.413e-13
29	28861624	29118061	29118061	T	C	281883	5.919	3.23e-09
29	29703537	29870558	29714484	A	G	275677	-9.032	1.682e-19
29	30413762	30438661	30413762	A	C	204182	5.893	3.803e-09
29	36616247	36616247	36616247	A	G	268601	5.94	2.847e-09
29	39989783	40256148	40050516	A	G	281883	-7.677	1.626e-14
29	44442260	44760333	44685080	T	C	252800	-6.545	5.947e-11
29	45499545	45662635	45662635	A	C	257281	-6.689	2.25e-11
29	46461899	46466065	46461899	T	C	281883	-5.566	2.613e-08
29	47185271	47488223	47488223	A	C	281883	-6.111	9.91e-10
29	48631025	48871265	48856667	A	G	197950	6.363	1.978e-10
29	48909325	49565387	49409197	T	G	281883	7.624	2.46e-14

## Sheet: SuppTable5c-Meta-GWAS-QTL-PY
Supp Table 5c. Meta-GWAS QTL for protein yield (PY)
chr	start	end	topVariant	effectAllele	otherAllele	nRecords	Zscore	Pvalue
1	33663906	33663906	33663906	T	C	51181	-7.441	9.963e-14
1	39607477	39607477	39607477	T	C	48029	5.971	2.357e-09
1	89494549	89981983	89494549	A	G	176139	5.747	9.101e-09
1	90013480	90052891	90052891	A	G	188610	-5.611	2.006e-08
1	94468280	94682982	94468280	T	C	240077	5.742	9.335e-09
1	104353268	104477666	104353280	T	G	191762	5.66	1.512e-08
1	104503320	104520420	104503320	A	C	188610	-5.51	3.583e-08
1	107697537	108040340	107697537	T	C	268810	-5.849	4.96e-09
1	119377303	119434991	119387622	A	G	281643	-6.904	5.046e-12
1	120397927	120397927	120397927	T	C	279860	5.504	3.715e-08
1	128865267	128865267	128865267	A	G	51181	-6.517	7.181e-11
1	134179453	134183376	134179453	T	C	281643	-5.695	1.234e-08
1	142757927	142914118	142827399	C	G	281643	-6.887	5.693e-12
1	145872086	145874970	145872446	C	G	265859	-6.073	1.255e-09
1	146843456	146911293	146848078	T	G	281643	-6.471	9.723e-11
1	152351568	152351568	152351568	C	G	275306	-6.404	1.514e-10
1	153418927	153641671	153610726	A	C	211529	5.959	2.536e-09
1	155864547	155898183	155898183	A	G	281643	-5.978	2.255e-09
2	58835585	58835585	58835585	A	G	80497	-6.484	8.927e-11
2	105093583	105195977	105125899	A	T	281643	8.231	1.856e-16
2	105733201	105911056	105779391	T	C	212366	-5.995	2.031e-09
2	106530388	106642740	106642740	A	G	38027	-5.849	4.941e-09
2	106953009	107524689	107210611	T	C	277803	6.257	3.924e-10
2	109035346	109035999	109035845	A	G	281643	-5.673	1.403e-08
2	113243407	113243407	113243407	A	T	278950	5.463	4.694e-08
2	115871975	115871975	115871975	A	G	60335	5.553	2.801e-08
2	118415706	118641546	118415706	A	G	225457	6.117	9.531e-10
2	122365596	122367393	122367393	A	G	203017	-6.125	9.068e-10
2	125193997	125440852	125219783	T	C	279860	-6.448	1.134e-10
2	126663597	127053602	127045548	C	G	281643	-5.785	7.246e-09
3	6215730	6222178	6219967	A	G	281643	6.065	1.318e-09
3	7216040	7554637	7269099	T	G	257739	-6.425	1.32e-10
3	7868032	7942262	7913888	T	C	281643	-6.102	1.048e-09
3	9241034	9484952	9351446	A	G	281643	-6.03	1.641e-09
3	12740357	12740360	12740360	C	G	239836	5.701	1.194e-08
3	13627777	13627777	13627777	T	C	80497	-9.215	3.117e-20
3	14772603	14956193	14801339	T	C	275306	6.763	1.354e-11
3	15316655	15602932	15463300	T	G	240077	-10.64	1.946e-26
3	15981185	16940637	16454289	A	T	205192	6.868	6.496e-12
3	17142159	17158992	17142159	T	C	203550	-5.542	2.996e-08
3	17740509	18173840	17740509	T	C	241619	-5.907	3.481e-09
3	18444352	18462772	18462771	T	C	212273	5.568	2.575e-08
3	18905274	19145091	19145091	T	C	251763	-6.171	6.799e-10
3	19187397	19986102	19672203	A	G	239231	-6.509	7.576e-11
3	20235788	20420438	20271264	A	C	272376	5.758	8.502e-09
3	20719030	21163453	21144188	A	G	219354	7.125	1.038e-12
3	21671155	22190500	22096755	T	C	281643	6.406	1.492e-10
3	23327545	23327545	23327545	A	C	210230	5.963	2.478e-09
3	26379733	26379733	26379733	A	T	48029	-5.485	4.138e-08
3	28367310	28527615	28406424	A	G	273523	-5.794	6.875e-09
3	53026741	53026750	53026750	T	C	51181	-5.474	4.406e-08
3	53540086	54022294	53583376	T	C	280496	5.928	3.063e-09
3	54090539	54107288	54107134	T	C	278491	5.848	4.982e-09
3	87473818	87475641	87475365	C	G	83649	-15.592	8.309e-55
3	93650081	93808214	93650081	T	C	265096	6.348	2.183e-10
3	93898090	94358623	94358623	T	C	242770	-6.526	6.747e-11
3	95211402	95316441	95316441	A	G	249107	7.181	6.908e-13
3	96424671	96802132	96424671	T	C	80497	-6.384	1.724e-10
3	98417436	98417436	98417436	A	G	92068	5.992	2.07e-09
3	100059715	100059715	100059715	T	C	281643	-5.477	4.336e-08
3	101690186	101776583	101776583	A	G	281643	5.6	2.14e-08
3	116856950	116909983	116891213	T	C	281643	-5.745	9.208e-09
3	117434508	117656502	117517325	T	C	201305	6.362	1.99e-10
3	117722106	118506656	118188452	T	G	205861	-6.885	5.79e-12
3	118757007	118988284	118787891	A	G	239483	-5.879	4.128e-09
3	120323788	120708078	120559186	T	C	260690	-7.686	1.517e-14
4	10207086	10286663	10269437	T	G	281643	-8.278	1.254e-16
4	34331471	34336852	34332638	A	G	48029	13.997	1.634e-44
4	39890158	40323551	39918470	T	G	51181	6.755	1.424e-11
4	40445303	40558147	40445329	A	C	274329	6.302	2.938e-10
4	43140110	43948150	43607698	A	G	208836	5.991	2.081e-09
4	44201930	44881427	44660952	T	C	207078	6.072	1.265e-09
4	45996563	46520149	46405347	A	G	281643	6.526	6.773e-11
4	47052342	47065694	47052342	A	G	63813	-8.743	2.26e-18
4	47557997	48210840	47744394	T	G	236925	6.304	2.893e-10
4	48326649	48417290	48326649	C	G	242770	6.008	1.874e-09
4	48793869	48793869	48793869	A	T	109255	6.725	1.76e-11
4	49578001	49622477	49578001	A	G	205192	5.774	7.74e-09
4	50341963	50344745	50344745	T	C	220419	-5.732	9.934e-09
4	50794766	50915692	50915692	T	C	207537	-5.764	8.19e-09
4	51594998	52010692	51700101	A	G	199419	5.846	5.026e-09
4	62512502	62512502	62512502	T	C	25685	5.658	1.535e-08
4	63659340	63659340	63659340	A	G	25685	6.541	6.102e-11
4	64388408	64518599	64433532	T	C	281643	-6.301	2.965e-10
4	65714996	65718282	65714996	A	G	281643	5.82	5.885e-09
4	67621375	67621375	67621375	T	C	80497	6.7	2.082e-11
4	75234279	75277811	75259306	A	G	279860	5.677	1.369e-08
4	75811762	76208786	76122467	A	T	281643	5.78	7.483e-09
4	109738313	109738313	109738313	T	C	67131	-5.594	2.221e-08
4	112615617	112827014	112796751	T	C	281643	-7.52	5.469e-14
4	113574033	113737418	113731333	T	C	281643	-6.115	9.63e-10
4	118647615	118666436	118647615	C	G	198936	-5.742	9.341e-09
5	5183247	5322909	5186390	T	G	278950	5.893	3.785e-09
5	7378610	7378610	7378610	A	G	196267	5.837	5.326e-09
5	7603975	8323959	7884732	T	C	227240	6.111	9.886e-10
5	8838075	9414375	8938348	A	G	241553	-6.422	1.345e-10
5	9458321	9722169	9472519	A	G	215790	-5.982	2.203e-09
5	13460536	13460536	13460536	A	T	278950	5.778	7.562e-09
5	20079202	20505242	20194575	A	G	278950	-6.759	1.394e-11
5	23595282	23595282	23595282	T	G	272613	-5.745	9.172e-09
5	33361412	33686698	33458192	A	C	269683	-6.649	2.955e-11
5	39799514	39813783	39799514	A	T	80497	5.7	1.198e-08
5	58305930	58305930	58305930	T	C	149287	5.48	4.252e-08
5	80725199	80725199	80725199	A	G	278950	-5.555	2.775e-08
5	84059130	84386844	84114651	C	G	277167	-6.24	4.363e-10
5	84489766	84892196	84892196	A	C	204385	-6.947	3.725e-12
5	85083499	85853223	85431651	G	GT	197768	-7.936	2.089e-15
5	86205868	86617706	86205868	A	G	204385	7.926	2.26e-15
5	86918774	87346733	87048253	A	C	237937	7.657	1.902e-14
5	87511708	87863463	87855486	T	C	255046	-8.397	4.593e-17
5	88394121	88454455	88406861	A	G	278950	-20.734	1.69e-95
5	88907538	89134407	88914316	A	G	202499	8.02	1.055e-15
5	89149608	90035542	89642850	C	G	202499	-8.438	3.241e-17
5	90184766	90226363	90184766	T	C	204385	8.361	6.201e-17
5	92575327	92787704	92787704	T	TTC	263963	-7.68	1.597e-14
5	93376029	93524398	93512760	CT	C	230792	10.038	1.033e-23
5	94020332	94157223	94157223	CT	C	219214	-5.829	5.581e-09
5	95044265	95064047	95064047	A	G	278950	5.837	5.3e-09
5	95618493	95807568	95618493	T	C	268909	5.607	2.054e-08
5	97401284	97407101	97403241	A	G	278950	6.026	1.685e-09
5	102995848	102995848	102995848	T	C	44275	-5.606	2.073e-08
5	108293182	108293182	108293182	T	C	216383	-6.001	1.962e-09
5	108488134	108880390	108880390	A	C	233577	6.93	4.213e-12
5	109642654	109924611	109923576	A	G	278950	5.505	3.686e-08
5	110318123	110500565	110461596	A	G	237102	6.793	1.101e-11
5	110774931	111317437	111130673	T	C	177976	-7.285	3.211e-13
5	111797634	111947892	111879262	A	G	278950	15.729	9.595e-56
5	112381736	112576387	112548646	A	G	245398	-6.175	6.618e-10
5	115215247	115362774	115265761	T	C	264971	5.89	3.851e-09
5	115853443	116078904	116078904	T	C	83649	-6.164	7.097e-10
5	117102808	117551056	117500441	A	G	236925	6.085	1.164e-09
6	36143502	36808072	36539760	T	C	135008	6.881	5.939e-12
6	40605083	40845179	40845179	T	C	182219	5.807	6.377e-09
6	77186483	77673723	77190324	A	G	251455	6.002	1.949e-09
6	77928867	78277185	78226345	T	C	271602	6.554	5.619e-11
6	79830163	80318227	79994361	T	C	194344	-7.198	6.115e-13
6	80412035	81021624	80868795	A	AAAGTTATG	200161	8.42	3.773e-17
6	81501294	82104719	81863627	T	G	265757	-7.858	3.892e-15
6	82382389	82432717	82382389	A	G	271602	6.186	6.187e-10
6	82458569	83001572	82940716	A	G	245820	7.377	1.618e-13
6	83640723	83671591	83641219	A	G	269819	10.547	5.261e-26
6	84216543	84702811	84216543	A	G	271602	10.315	6.016e-25
6	84869255	84883869	84883869	A	G	166961	-9.874	5.387e-23
6	85424759	85564407	85438122	T	C	271602	18.486	2.66e-76
6	86127635	86448746	86326415	A	G	233293	-10.971	5.255e-28
6	86745512	87295188	86986115	T	G	270455	-16.231	3.065e-59
6	87510442	87938481	87516879	A	G	234772	7.891	3e-15
6	88130507	88522637	88269476	T	TGAAA	211407	7.609	2.77e-14
6	88836802	89067959	88882609	A	G	256076	-6.951	3.627e-12
6	89566459	89613563	89598169	T	C	271602	-5.673	1.407e-08
6	111688769	111688769	111688769	A	G	83649	6.776	1.238e-11
7	41258623	41258623	41258623	T	C	48029	-5.526	3.283e-08
7	42604480	42604480	42604480	A	G	233577	-6.625	3.475e-11
7	42648558	43188357	43135669	C	G	281643	-6.831	8.444e-12
7	43693932	43935699	43693932	A	G	272154	-9.492	2.27e-21
7	44204296	44643091	44370188	A	T	247447	-7.192	6.391e-13
7	69135975	69135975	69135975	A	G	96281	7.608	2.79e-14
7	70293564	70370066	70370066	A	G	193796	5.67	1.432e-08
7	70933189	71420780	71416782	T	C	201305	-5.875	4.223e-09
7	80403056	80403056	80403056	C	G	281643	-5.473	4.423e-08
7	95683952	95828326	95754863	A	G	263482	6.44	1.198e-10
7	96875174	96930509	96875174	A	T	80497	-11.746	7.378e-32
7	107044940	107044940	107044940	T	C	267325	5.796	6.79e-09
8	5565640	5610064	5591284	C	G	275306	-5.647	1.631e-08
8	30036710	30120217	30074300	A	G	281643	6.244	4.256e-10
8	40364393	40868362	40815753	C	G	269650	-6.09	1.126e-09
8	43135114	43197387	43155138	T	G	281643	-6.75	1.477e-11
8	49571855	49635014	49589404	T	G	48029	-6.559	5.435e-11
8	56033629	56033629	56033629	A	G	196267	-5.5	3.793e-08
8	56094593	56570709	56570709	A	G	236090	5.849	4.947e-09
8	73316151	73373576	73338664	T	G	281643	-6.079	1.212e-09
8	93051824	93073401	93073401	A	G	277167	5.66	1.511e-08
9	32701542	33031243	32703576	T	TGAGG	245350	-6.511	7.488e-11
9	35335082	35335082	35335082	T	G	257739	-5.694	1.242e-08
9	38264478	38264478	38264478	A	G	281643	6.402	1.533e-10
9	51615286	51662558	51662558	A	AT	80497	-6.603	4.041e-11
9	59533157	59533157	59533157	A	G	281643	-5.976	2.28e-09
9	88246620	88246620	88246620	T	C	271636	-5.502	3.759e-08
9	88682329	88779951	88755751	T	C	281643	-5.839	5.266e-09
9	93346115	93346115	93346115	T	C	51181	-6.337	2.339e-10
9	100456861	100467759	100462780	A	G	249103	-5.717	1.084e-08
10	14394235	14394235	14394235	T	C	51181	6.118	9.447e-10
10	15667331	15705313	15673898	A	G	281643	5.743	9.308e-09
10	16842788	16842788	16842788	A	G	281643	-5.485	4.13e-08
10	45612666	45936698	45850478	T	C	260924	-7.186	6.689e-13
10	46548638	46548638	46548638	A	G	279860	5.865	4.485e-09
10	47026135	47373485	47240103	A	C	204385	-6.469	9.874e-11
10	48257531	48257531	48257531	T	G	77221	-6.584	4.583e-11
10	48947579	49029361	49029361	T	C	57892	-6.443	1.168e-10
10	50699239	50833368	50741000	T	G	281643	5.862	4.579e-09
10	83422285	83422285	83422285	A	G	281643	5.456	4.881e-08
10	84526093	84637259	84589494	T	G	280496	-6.038	1.559e-09
10	87188544	87190837	87188544	T	C	281643	-5.553	2.8e-08
11	3397678	3401946	3397678	A	G	96921	5.827	5.634e-09
11	13792896	14242053	14081558	A	C	249103	-6.006	1.903e-09
11	26188615	26194953	26190780	T	C	281643	5.59	2.266e-08
11	72737931	72737931	72737931	T	C	281643	-6.07	1.277e-09
11	95523639	95860293	95523639	T	G	281643	5.884	4.011e-09
11	100069720	100072103	100069720	A	C	263949	-5.566	2.606e-08
11	101237744	101736981	101237744	A	G	279860	7.526	5.245e-14
11	101739737	101745212	101745212	T	C	281643	7.515	5.699e-14
11	102460324	102523096	102503337	T	G	281643	8.042	8.812e-16
11	103242691	103277147	103276218	T	TA	268439	19.861	8.824e-88
11	103808561	104348663	104182435	A	G	123214	7.106	1.191e-12
11	104993289	105191349	105191349	T	C	229749	-5.541	3.005e-08
11	105540684	106359168	105955819	T	G	220169	-6.989	2.766e-12
11	106487029	106825348	106533752	A	G	200470	6.141	8.188e-10
12	9812208	9812208	9812208	T	C	80497	7.584	3.363e-14
12	11742715	11742715	11742715	T	C	278713	5.526	3.273e-08
12	18520567	18588086	18577886	T	C	279860	5.595	2.204e-08
12	19406290	19870200	19407514	A	G	281643	7.056	1.711e-12
12	19939882	20188234	19951499	A	G	281643	-6.685	2.307e-11
12	20882764	20960985	20882764	C	G	268810	-5.688	1.285e-08
12	22316665	22316665	22316665	C	G	281643	5.656	1.552e-08
12	24840346	25278792	24875702	A	G	270547	6.23	4.659e-10
12	25650455	25892118	25740971	A	G	281643	5.908	3.47e-09
12	26259109	26354335	26354335	A	G	239618	5.555	2.783e-08
12	26900054	27164307	26913496	A	G	281643	-6.536	6.321e-11
12	27777638	27788293	27788293	A	C	267397	5.51	3.59e-08
12	46407391	46407391	46407391	T	C	201305	-5.627	1.833e-08
12	54944533	54944533	54944533	A	C	101807	6.485	8.865e-11
12	73517761	73517761	73517761	A	T	82474	-5.467	4.566e-08
13	14930573	14930573	14930573	C	G	280484	5.662	1.5e-08
13	15756502	16216960	15839954	T	G	281643	6.663	2.675e-11
13	17523348	17523348	17523348	A	G	217288	-5.465	4.622e-08
13	19016024	19379366	19379366	A	G	281643	-5.548	2.883e-08
13	25081534	25389344	25285802	T	C	101216	6.041	1.532e-09
13	26025295	26046527	26046527	A	G	245398	-5.654	1.564e-08
13	35675386	35845836	35675386	C	G	279860	6.189	6.045e-10
13	36192852	36699135	36687210	A	G	273523	6.524	6.865e-11
13	37879166	38032594	38029730	C	G	281643	-5.854	4.795e-09
13	40943779	41779520	41316415	T	G	281643	6.163	7.159e-10
13	41880567	41880567	41880567	T	G	275306	5.633	1.766e-08
13	42507807	43104015	42623673	A	G	244906	6.227	4.76e-10
13	44477729	44477729	44477729	A	C	131003	11.766	5.876e-32
13	45040195	45159642	45111205	T	C	217218	-5.694	1.244e-08
13	45592015	45888294	45855973	A	AT	268439	6.134	8.552e-10
13	48446160	48785374	48616351	A	C	273523	6.251	4.079e-10
13	51078419	51313237	51313237	T	G	247944	-5.546	2.921e-08
13	53726406	54135648	53736323	C	G	275306	6.941	3.887e-12
13	54485798	55149168	54649924	A	G	281643	6.752	1.455e-11
13	55989351	55989351	55989351	T	C	268174	5.536	3.095e-08
13	56931864	57028803	57028803	A	G	249103	5.757	8.552e-09
13	57481117	57595679	57544274	T	C	204385	-6.165	7.066e-10
13	59218188	59345664	59303086	A	G	281643	-6.157	7.426e-10
13	62367594	62703143	62443693	C	G	249103	-5.837	5.329e-09
13	64398664	64486886	64485789	T	C	273523	6.272	3.558e-10
13	65145386	65410558	65182314	T	G	279860	6.207	5.417e-10
13	66379554	66934929	66463159	A	G	213513	-6.578	4.783e-11
13	68144253	68216839	68151321	A	G	281643	-6.443	1.168e-10
13	69444836	69471906	69444836	C	G	263875	5.967	2.411e-09
13	75913441	76247313	75916959	A	G	273523	-6.057	1.388e-09
13	76882931	76894877	76883219	A	G	281643	-6.164	7.081e-10
13	77985406	78416534	78030482	A	G	223321	-7.106	1.197e-12
13	78766298	78860125	78860125	T	C	231407	5.708	1.145e-08
14	468531	655590	576688	G	GGGGGAGGGGCTGC	170936	-53.77	2.24e-630
14	1175645	1749282	1303361	C	G	116755	24.766	2.09e-135
14	1811759	1818795	1818795	A	G	101199	-17.118	1.099e-65
14	2365310	2415920	2385428	A	G	252451	6.996	2.637e-12
14	2460235	3339255	2925327	A	ACTGACCATTGGCTGAGCGGGACCCCTTGAGGTCGCTCACTGATGTTTGGTCACCTGGGCAGGGGCCCACTGAAGCC	254544	9.588	8.962e-22
14	3426529	3473523	3473523	A	G	206734	-8.976	2.816e-19
14	4101938	4128491	4128491	T	C	83190	-6.655	2.824e-11
14	4222194	4647532	4636851	CGG	C	268439	7.862	3.784e-15
14	5546464	5546655	5546529	A	G	281643	5.731	9.974e-09
14	5903559	6654547	6274739	CA	C	268439	6.622	3.549e-11
14	6785370	6789077	6785370	T	C	281643	-5.652	1.589e-08
14	6794432	7619540	7293858	A	T	281643	6.611	3.812e-11
14	8822458	9051405	9019287	T	C	281643	-6.625	3.478e-11
14	11383553	11383553	11383553	T	C	243335	5.464	4.656e-08
14	15137165	15177246	15153931	T	C	281643	-6.048	1.468e-09
14	18140236	18182985	18159057	A	T	103959	-6.165	7.066e-10
14	43910271	43910271	43910271	A	G	80497	-13.25	4.487e-40
15	11154310	11165724	11159327	A	G	51181	7.037	1.961e-12
15	61431007	61585369	61585369	C	G	99833	6.703	2.04e-11
15	75807139	75812957	75809581	T	TG	262102	6.114	9.709e-10
16	1476314	1476314	1476314	C	G	275306	5.71	1.128e-08
16	6451796	6513170	6467300	T	G	278713	-5.678	1.363e-08
16	24823824	24823824	24823824	A	G	235138	5.739	9.543e-09
16	29489897	30129044	29980932	T	C	281643	-5.957	2.568e-09
16	30564828	30580268	30580268	A	G	279860	5.899	3.649e-09
16	31170201	31171306	31171306	A	G	281643	5.833	5.43e-09
16	33397544	33397544	33397544	T	C	279860	5.619	1.925e-08
16	39846203	40119779	39846203	T	C	244906	-5.895	3.743e-09
16	41389773	41389773	41389773	A	G	281643	-5.561	2.68e-08
16	52470978	52470978	52470978	C	G	242766	5.587	2.314e-08
16	55635721	55635721	55635721	A	T	98974	5.481	4.236e-08
16	77215046	77231179	77223248	A	G	103102	8.129	4.335e-16
16	79945662	80206416	79945662	T	C	57642	-6.059	1.368e-09
17	34203767	34211944	34211944	T	C	281643	-6	1.972e-09
17	46148478	46178667	46173455	T	C	281643	-5.857	4.719e-09
17	53889456	54325482	54136718	C	G	281643	6.628	3.412e-11
17	64017702	64017702	64017702	T	C	73107	-5.885	3.979e-09
17	66688294	66688294	66688294	A	T	204385	-5.546	2.918e-08
17	67053818	67330305	67330305	C	G	207078	5.804	6.478e-09
17	70489776	70504073	70501994	T	C	260793	-6.278	3.424e-10
17	71954979	72390024	72160566	A	G	275306	6.814	9.489e-12
17	72907520	73093520	73083293	T	C	281643	-6.041	1.535e-09
18	6517900	6757999	6591133	T	C	239618	7.052	1.768e-12
18	8941579	9432233	8941579	A	G	252451	5.56	2.695e-08
18	12079545	12941906	12537711	A	T	281643	5.697	1.217e-08
18	13762236	13762236	13762236	C	G	94541	-5.648	1.62e-08
18	18063272	18364211	18258983	T	C	281643	6.935	4.058e-12
18	34899922	35111626	35005915	A	G	273523	6.253	4.017e-10
18	35843218	35960432	35843218	A	T	236925	5.682	1.331e-08
18	36422585	36842088	36801878	T	C	263166	-6.623	3.523e-11
18	44239535	44239535	44239535	A	G	81474	-5.453	4.947e-08
18	55132477	55132477	55132477	T	C	50498	-5.633	1.77e-08
18	55475029	55825808	55825807	C	G	242770	7.925	2.282e-15
18	55875073	56399648	56354437	T	C	243929	-8.332	7.924e-17
18	56606343	57152737	57056544	T	G	271387	9.021	1.867e-19
18	57623004	58012565	57689072	A	G	244906	-8.88	6.713e-19
18	58256194	58286137	58256194	A	T	196585	-6.596	4.232e-11
18	59221018	59466252	59259659	T	G	206739	6.875	6.181e-12
18	59707929	60135139	60085291	A	C	241236	8.674	4.181e-18
18	61990941	61994547	61994547	A	C	281643	-5.835	5.366e-09
19	9201936	9225369	9212657	A	G	281643	-6.105	1.029e-09
19	12847533	12860432	12848024	T	TC	262102	6.058	1.38e-09
19	18136026	18140635	18140635	A	C	281643	5.55	2.849e-08
19	18381445	18902953	18773246	T	C	281643	-6.174	6.65e-10
19	21365785	21477044	21395686	T	C	239717	5.71	1.131e-08
19	22269647	22666541	22392055	T	C	279860	6.243	4.288e-10
19	23337235	23782821	23337235	C	G	56055	6.316	2.676e-10
19	24078257	24078257	24078257	T	C	6337	-5.544	2.957e-08
19	25983234	26077540	26048298	A	G	244906	6.37	1.893e-10
19	26433980	26985433	26652718	A	G	204385	-6.964	3.296e-12
19	27558658	27925305	27558658	A	G	273662	6.231	4.624e-10
19	37213158	37217129	37213158	T	G	281643	6.262	3.795e-10
19	37889644	38168260	38045433	C	G	207078	6.685	2.302e-11
19	38657031	38657031	38657031	T	C	196480	6.048	1.467e-09
19	39492692	39492692	39492692	A	G	273523	-5.476	4.346e-08
19	40134534	40189767	40186178	C	G	280496	-7.247	4.257e-13
19	40737347	40743309	40737347	T	C	281643	5.71	1.13e-08
19	49633467	50163440	49924254	T	TGTC	262102	6.687	2.271e-11
19	50719689	50734428	50719689	T	TC	260319	8.882	6.55e-19
19	51292817	51292817	51292817	A	G	240077	-5.966	2.438e-09
19	53610918	53610918	53610918	A	AACTGCTGCTGCT	266656	5.455	4.896e-08
19	54298214	55042245	54696777	T	C	204385	6.653	2.867e-11
19	55484742	56302020	55826122	T	C	211377	-6.518	7.123e-11
19	56366962	56575677	56369915	T	TCA	192340	6.315	2.709e-10
19	60043707	60245279	60245279	A	T	278491	-7.114	1.13e-12
19	60810003	60908129	60898010	T	C	281643	-8.208	2.253e-16
19	61462104	61518737	61518737	A	G	281643	6.08	1.199e-09
19	62800443	63030464	63002997	T	C	281643	-6.397	1.581e-10
20	232659	240766	232659	A	C	149242	-6.152	7.662e-10
20	2059854	2059854	2059854	A	G	281643	5.632	1.786e-08
20	8854237	8854237	8854237	A	G	281643	5.588	2.294e-08
20	9803064	9803106	9803064	T	C	281643	5.88	4.095e-09
20	10082914	10657660	10284439	A	G	195432	5.871	4.325e-09
20	10952181	10952181	10952181	A	G	234860	-5.477	4.335e-08
20	11775845	12318300	12054611	T	C	240077	6.691	2.22e-11
20	12611661	12749185	12744850	A	G	281643	-6.052	1.429e-09
20	22980337	23130003	23123743	A	G	281643	6.187	6.133e-10
20	25254754	25254754	25254754	A	G	281643	5.475	4.379e-08
20	31027146	31573480	31406128	A	G	281643	-5.946	2.752e-09
20	32359186	32874269	32418232	T	C	281643	-7.714	1.223e-14
20	33984902	33984902	33984902	T	G	203285	-5.699	1.204e-08
20	38346226	38908133	38674954	A	G	281643	6.213	5.212e-10
21	4098536	4098536	4098536	T	G	80497	6.628	3.398e-11
21	8698863	8770509	8698863	C	G	257739	-6.419	1.37e-10
21	21926183	21960565	21960565	T	C	210230	5.689	1.281e-08
21	22121623	22621944	22529741	T	C	245955	-6.14	8.266e-10
21	23394565	23394565	23394565	T	C	176334	5.701	1.194e-08
21	24726079	24964402	24943789	T	C	281643	-6.183	6.298e-10
21	39578384	39578384	39578384	A	G	281643	5.641	1.695e-08
21	41681160	41681166	41681166	T	C	279860	-5.719	1.07e-08
21	43118523	43118523	43118523	T	TA	268439	5.483	4.177e-08
21	46620478	46622887	46620478	A	G	57518	-8.652	5.071e-18
21	65902857	66343113	66252534	A	G	281643	-6.448	1.131e-10
21	66917234	67495464	67026936	A	G	281643	-6.378	1.789e-10
22	25016	56977	38105	T	C	121620	8.704	3.218e-18
22	43513566	43513566	43513566	A	G	133988	-5.574	2.485e-08
22	45127748	45129131	45128307	A	C	73302	-6.694	2.17e-11
22	47745841	47765602	47754994	A	G	281643	-5.878	4.155e-09
22	50121707	50201281	50124411	A	C	279020	-5.822	5.814e-09
22	59714055	60063229	59881192	T	C	262473	6.288	3.222e-10
22	60598941	60630297	60615753	A	G	281643	7.648	2.041e-14
23	15379682	15379682	15379682	T	C	271387	5.523	3.324e-08
23	16854493	17297365	17297365	T	C	274159	-5.601	2.137e-08
23	21909177	22164694	22164694	A	G	80497	6.454	1.087e-10
23	24298936	24479241	24298936	A	C	281643	5.986	2.152e-09
23	25364906	26122489	25797203	A	G	281643	-6.409	1.463e-10
23	26978805	26978805	26978805	T	C	281643	5.895	3.753e-09
23	27654718	27732931	27729896	A	G	281643	-5.819	5.936e-09
23	28099161	28309466	28293481	A	G	192834	-6.465	1.015e-10
23	28411426	28934652	28810212	T	C	281643	-8.831	1.038e-18
23	29315803	29844818	29748265	A	G	203269	7.754	8.9e-15
23	30328502	30428677	30364063	A	G	273523	-6.828	8.632e-12
23	30454264	31340068	30929912	A	G	240983	7.684	1.547e-14
23	31478933	31608268	31552032	T	C	281643	-6.577	4.789e-11
23	32247414	32361228	32326995	T	G	193122	-5.897	3.703e-09
23	32857346	32915112	32863031	A	G	241194	-5.612	2.004e-08
23	33790208	33920187	33881589	C	G	226500	-6.05	1.446e-09
23	33920845	34469261	34420662	T	C	236270	6.384	1.725e-10
23	34602062	35208766	35208766	A	C	263974	6.118	9.487e-10
23	36738513	36738513	36738513	T	C	281643	5.458	4.806e-08
23	41669760	41735584	41735584	T	C	281643	6.468	9.903e-11
23	42511808	42547973	42524024	T	C	281643	-6.332	2.416e-10
23	48093838	48093838	48093838	A	G	275306	5.527	3.259e-08
24	24518417	24581867	24579324	G	GTT	157709	-6.02	1.745e-09
24	26922845	27167743	27032415	A	G	190716	-6.412	1.436e-10
24	27729382	27733513	27729382	T	C	281643	-5.489	4.034e-08
24	28234321	28873975	28404795	A	G	197872	-6.797	1.069e-11
24	29231153	29346014	29231153	C	G	187283	-5.565	2.629e-08
24	31786436	31793063	31789244	T	G	281643	-5.974	2.315e-09
24	34581930	34601291	34594118	A	G	270552	-6.01	1.856e-09
24	59651638	59664855	59657625	G	GA	268439	-5.918	3.258e-09
24	60242957	60242957	60242957	T	C	275306	5.467	4.571e-08
24	61368055	61516826	61474884	A	G	281643	-6.902	5.113e-12
25	875286	899078	899078	T	G	34635	5.98	2.228e-09
25	1180628	1988415	1573358	T	C	27054	-6.274	3.527e-10
25	2398358	2502647	2492551	A	C	273523	6.177	6.545e-10
25	3659332	3811159	3796884	A	G	279860	-5.686	1.303e-08
25	6829784	6836359	6832763	T	C	275306	-5.673	1.405e-08
25	9877533	9877533	9877533	CAGACCACCTGACCTGCCTCTTGAGA	C	268439	-5.641	1.693e-08
25	13266791	13271514	13271514	T	G	281643	-6.52	7.015e-11
25	24523849	24523849	24523849	A	G	83649	-9.55	1.292e-21
25	26926662	27113381	27054601	A	G	273523	8.105	5.253e-16
25	27559845	27559845	27559845	T	C	210441	-5.456	4.868e-08
25	35636588	35759427	35755679	C	G	281643	-6.733	1.659e-11
25	37220588	37220588	37220588	A	G	159037	5.501	3.785e-08
25	38523294	38897838	38897838	C	G	20719	-5.637	1.732e-08
26	10116943	10162223	10143456	A	G	281643	-7.81	5.701e-15
26	11192216	11461986	11461986	A	G	280484	-6.12	9.335e-10
26	11914578	12005364	11979755	A	C	272613	-6.136	8.463e-10
26	13168645	13654253	13209554	A	C	228637	6.022	1.726e-09
26	15317601	15682438	15317601	A	T	57644	6.938	3.967e-12
26	16002539	16002539	16002539	T	G	49171	-5.822	5.8e-09
26	16794585	16794585	16794585	A	G	225199	-5.971	2.356e-09
26	32879628	32879628	32879628	A	G	83190	-8.304	1.007e-16
26	36113009	36463637	36454069	T	C	275306	-6.046	1.484e-09
26	41241212	41329783	41309962	A	C	273170	7.074	1.508e-12
26	41994968	42283236	42073555	T	C	275306	6.408	1.475e-10
26	44223400	44336101	44226596	T	C	279860	7.199	6.069e-13
26	45199395	45544673	45340065	T	C	273170	6.655	2.836e-11
27	36442395	36551169	36522002	T	TG	265746	14.35	1.068e-46
27	37084424	37386617	37386486	T	TA	265746	-5.939	2.86e-09
28	4763676	5237164	4794397	T	C	281643	-5.889	3.896e-09
28	5322088	5322088	5322088	A	G	281643	5.462	4.711e-08
28	6735318	6792768	6792768	T	C	203550	-5.551	2.833e-08
28	7896542	7897294	7896743	A	C	281643	5.615	1.969e-08
28	8843286	8846948	8843286	C	G	278713	-5.487	4.078e-08
28	12020041	12028832	12028832	A	G	281643	5.558	2.726e-08
28	15355906	15867663	15852619	A	C	254667	-6.006	1.906e-09
28	15923411	16893575	16411462	A	G	260337	6.492	8.449e-11
28	16947260	16947260	16947260	T	C	206797	5.828	5.604e-09
28	17928206	18067352	18062670	A	G	281643	8.084	6.275e-16
28	18583595	18597601	18588283	T	C	278491	-12.139	6.597e-34
28	19341220	19620224	19615208	T	G	193515	-6.205	5.463e-10
28	20223005	20350874	20306258	T	C	281643	5.755	8.659e-09
28	29370607	29508255	29387172	T	G	270286	-6.249	4.126e-10
28	34225607	35010538	34510739	T	C	281643	6.903	5.079e-12
28	35011232	35684015	35192041	A	C	252390	6.334	2.389e-10
28	41614887	41971240	41614887	A	G	192834	5.846	5.032e-09
29	28021242	28287872	28287872	T	C	195914	-5.569	2.556e-08
29	28419448	29190766	28861624	T	G	83649	6.708	1.972e-11
29	29703537	29802346	29708143	T	C	275306	9.825	8.794e-23
29	30413762	30584607	30413762	A	C	204104	6.463	1.028e-10
29	36941172	36987548	36941188	A	ACT	254474	5.621	1.901e-08
29	39624734	39635549	39634657	T	C	256592	5.892	3.809e-09
29	39989783	40445002	40181591	T	C	281643	7.048	1.817e-12
29	40714800	40737306	40737306	A	G	281643	6.194	5.869e-10
29	44442260	44760333	44622162	A	G	259701	-7.733	1.047e-14
29	45318788	45963675	45602846	T	C	274159	7.531	5.036e-14
29	46158699	46608988	46344365	A	G	232556	-6.458	1.064e-10
29	47163768	47177617	47164111	T	C	279860	-6.006	1.906e-09
29	47933283	47933944	47933944	T	C	281643	-5.771	7.871e-09
29	48531296	48531296	48531296	A	C	172706	5.654	1.572e-08
29	49409197	49564957	49409197	T	G	281643	7.395	1.411e-13

## Sheet: SuppTables5d-MetaGWAS-QTL-FC
Supp Table 5d. Meta-GWAS QTL for fat content (FC)
chr	start	end	topVariant	effectAllele	otherAllele	nRecords	Zscore	Pvalue
1	142806542	142914118	142860110	T	C	259085	-7.077	1.478e-12
1	152386273	152393426	152386273	T	C	259085	-8.1	5.508e-16
2	101521132	101665567	101521132	T	C	75551	5.762	8.336e-09
2	106935299	106936497	106936497	A	G	252661	5.605	2.085e-08
2	107436884	107449484	107437210	T	C	252661	-5.831	5.523e-09
2	120037799	120037799	120037799	T	C	85040	-6.073	1.258e-09
2	126963958	127257952	126963958	T	C	259085	5.555	2.772e-08
3	7868411	7955322	7932533	A	C	259085	11.063	1.902e-28
3	12741574	12753738	12741574	T	C	181369	5.881	4.066e-09
3	13627777	13658511	13627777	T	C	79824	-11.282	1.604e-29
3	14162020	14169686	14169686	C	G	195320	-5.636	1.744e-08
3	14810548	14848681	14834497	C	G	238046	-9.906	3.917e-23
3	15317396	15496472	15472860	T	G	252661	15.757	6.189e-56
3	15976954	16204266	15976954	A	G	259085	-8.013	1.12e-15
3	16525976	16987241	16838626	A	T	255303	6.119	9.428e-10
3	34200599	34277140	34214920	A	G	259085	10.728	7.522e-27
3	34785276	34785276	34785276	T	C	241773	5.647	1.633e-08
3	80431516	80606835	80605702	T	C	259085	-6.467	9.992e-11
3	104286335	104286335	104286335	A	G	246258	-5.568	2.576e-08
3	104887690	104896714	104887690	A	G	127174	-6.316	2.69e-10
4	2040778	2040778	2040778	T	C	82981	-9.7	3.018e-22
4	12661491	12661491	12661491	A	C	257944	-5.488	4.072e-08
5	6017402	6039829	6039829	T	C	96544	-8.245	1.658e-16
5	23507534	23599007	23563551	A	AT	252661	7.303	2.807e-13
5	30196320	30654865	30201542	A	T	219729	-6.428	1.289e-10
5	30954409	31204916	31161717	T	C	237818	10.859	1.813e-27
5	32008541	32510508	32122766	A	G	259085	7.013	2.335e-12
5	32622979	32879417	32879417	A	G	259085	6.017	1.772e-09
5	73532884	73642869	73642869	C	G	259085	-5.528	3.241e-08
5	75256775	75598122	75347483	T	G	259085	-10.972	5.187e-28
5	75931010	75931010	75931010	T	C	257297	-5.9	3.641e-09
5	83598746	84023406	83598746	A	G	3157	-5.519	3.419e-08
5	84100923	84350313	84108989	T	C	3157	5.491	4.006e-08
5	84642251	85435362	85045169	A	G	234692	6.519	7.067e-11
5	85627684	86314090	86182040	A	G	3157	5.902	3.598e-09
5	86885348	87055321	86885348	A	G	259085	8.179	2.852e-16
5	87448290	87882400	87539426	C	G	246258	7.623	2.471e-14
5	87945891	88883212	88397592	T	G	244470	8.653	5.029e-18
5	88908636	88930211	88930211	A	G	187311	-6.562	5.308e-11
5	89027101	89971320	89027101	A	G	257297	-9.832	8.191e-23
5	89995884	90026157	90010807	A	G	215034	7.658	1.893e-14
5	90074036	90541101	90532172	T	C	239957	8.353	6.674e-17
5	90638946	91048519	91047350	C	G	259085	15.68	2.079e-55
5	91889454	92004693	91889454	A	G	190950	-15.77	5.028e-56
5	92753116	92954598	92788261	T	C	259085	21.161	2.19e-99
5	93514562	93525109	93516066	T	C	192889	-41.635	7.31e-379
5	94051710	94254338	94229261	C	G	136804	-17.86	2.421e-71
5	94900575	95296928	95153546	C	G	259085	-12.29	1.021e-34
5	95736393	96051873	95921813	T	C	259085	10.108	5.109e-24
5	96259148	97009109	96721651	T	G	259085	10.047	9.505e-24
5	97231633	97258901	97238126	A	ATTTCACTGTTTCCACTTCCTTCCTTCCTTCTC	17969	-6.794	1.09e-11
5	97400592	97763562	97763562	T	G	259085	11.327	9.616e-30
5	98272753	98697140	98311425	CAT	C	226153	-6.13	8.766e-10
5	98796386	99392798	99291371	A	T	22605	6.782	1.186e-11
5	99856143	99856190	99856190	A	G	259085	-5.931	3.004e-09
5	101934429	102235071	101934429	T	C	24393	-5.952	2.655e-09
5	103498607	103691453	103498607	A	G	259085	8.646	5.34e-18
5	108942760	109192141	109192141	T	C	249964	5.787	7.146e-09
5	110020022	110080311	110020130	T	G	259085	-6.104	1.033e-09
5	112203430	112461503	112461503	A	G	40715	6.46	1.048e-10
5	113479866	113487182	113487182	T	C	95654	-7.944	1.954e-15
5	117132182	117158453	117150901	T	G	251684	-9.478	2.599e-21
5	118061268	118085140	118061268	A	G	3157	7.175	7.252e-13
5	118947224	118947224	118947224	A	C	3157	-5.682	1.328e-08
6	35048854	35484400	35484400	A	G	5610	-5.949	2.696e-09
6	36315603	36808072	36315603	CCCG	C	23412	-11.821	3.033e-32
6	37445135	37445135	37445135	A	G	169482	-5.572	2.522e-08
6	37906466	37993188	37993188	A	G	10053	6.844	7.706e-12
6	38292393	38909485	38785485	A	G	10053	-6.833	8.33e-12
6	40584164	40584164	40584164	A	G	15663	-5.891	3.839e-09
6	40590135	41102806	41102806	T	C	15663	-6.512	7.406e-11
6	43594398	43594398	43594398	A	G	259085	-5.645	1.654e-08
6	84967079	85031338	85031338	T	G	253231	-6.668	2.596e-11
6	85401563	85564082	85564082	A	G	257297	9.32	1.159e-20
6	86951401	87361303	87018377	T	C	257944	-7.841	4.464e-15
6	111688769	111688769	111688769	A	G	82981	6.43	1.28e-10
7	16877441	16877441	16877441	T	C	20666	-5.951	2.672e-09
8	10297445	10344911	10327479	T	C	259085	5.947	2.735e-09
8	24914548	25133702	24914548	A	AT	25762	-6.043	1.509e-09
8	39262529	39559044	39476482	C	G	259085	6.966	3.269e-12
8	69903997	69903997	69903997	A	T	86764	-5.574	2.483e-08
8	88022841	88161777	88044571	T	C	257297	-11.203	3.952e-29
9	11866886	11866886	11866886	T	C	132516	-5.518	3.425e-08
9	26184559	26239444	26209292	T	C	249032	8.554	1.194e-17
10	33524221	33524221	33524221	A	T	96005	5.945	2.768e-09
10	45279186	45283985	45279186	A	G	259085	-5.89	3.851e-09
10	45795771	46018496	46014567	T	G	202882	-6.845	7.621e-12
10	46129284	46549019	46521400	A	G	257297	13.568	6.225e-42
10	62221106	62256872	62221106	T	C	259085	6.628	3.405e-11
10	65985415	65993499	65993499	T	C	50350	-6.629	3.383e-11
11	14839445	15009759	15002430	C	G	223882	7.441	1e-13
11	62119194	62245242	62197479	T	C	231995	5.871	4.323e-09
11	62257544	62754662	62754662	T	C	216510	5.975	2.306e-09
11	63254756	63263322	63259990	A	T	256388	10.334	4.938e-25
11	64573870	64607469	64591566	A	G	246807	-5.738	9.567e-09
11	100642158	100642158	100642158	A	G	256388	-5.619	1.921e-08
11	101401373	101559668	101559668	G	GC	248176	-5.598	2.163e-08
11	102280600	102567442	102292356	T	C	256388	-8.037	9.225e-16
11	103245609	103277147	103268177	A	C	256388	24.144	8.62e-129
11	104161337	104186734	104172456	G	GA	256388	-11.671	1.785e-31
11	104678391	104803014	104678391	A	G	26101	6.979	2.965e-12
12	9812208	9812208	9812208	T	C	79824	11.091	1.386e-28
12	18663068	18664492	18663073	CA	C	255928	-5.529	3.219e-08
12	69285608	69704930	69646449	T	C	223422	-7.672	1.697e-14
12	70188958	70771126	70760824	A	G	17969	6.445	1.158e-10
12	72867813	72867813	72867813	A	G	8212	5.535	3.114e-08
12	73116193	73727490	73567803	A	G	200247	7.004	2.496e-12
12	74647481	74647481	74647481	T	C	254140	-5.527	3.265e-08
12	74844432	75215219	75214295	C	G	255928	-5.894	3.769e-09
13	43097950	43097950	43097950	T	C	79824	-5.484	4.158e-08
13	44477729	44477729	44477729	A	C	171870	11.4	4.169e-30
13	47467526	47547471	47467526	A	T	255928	6.267	3.684e-10
13	63041958	63041958	63041958	A	G	35586	-5.722	1.053e-08
13	63085076	63234533	63085076	T	C	46248	-5.73	1.004e-08
13	64011135	64262227	64070248	A	G	255928	8.637	5.789e-18
13	64637705	64862430	64862430	A	T	255928	-5.7	1.2e-08
14	232284	888113	611019	A	G	141911	84.124	1.83e-1539
14	1137961	1158591	1137961	T	C	132084	49.768	2.36e-540
14	1187315	1813629	1760890	T	C	133804	59.787	8.70e-779
14	2184936	2302055	2204456	T	C	191434	35.699	4.05e-279
14	2743719	2765573	2743719	A	T	252661	21.964	6.42e-107
14	2781914	3722439	3274430	T	G	127950	-24.103	2.3e-128
14	3805220	3829221	3829221	C	G	259085	18.164	9.952e-74
14	4469791	4662560	4595270	A	G	257297	17.213	2.105e-66
14	5202418	5320212	5202418	A	G	116964	-13.829	1.7e-43
14	5712756	6162538	5875394	A	G	259085	11.587	4.789e-31
14	6274739	6896761	6692560	A	G	257297	-12.081	1.332e-33
14	7212265	7212265	7212265	A	C	105542	6.63	3.351e-11
14	7444725	8238781	7743708	A	T	173237	-11.152	7.011e-29
14	8245734	8541772	8258418	T	G	143265	9.057	1.342e-19
14	8918443	9350697	9051405	A	T	259085	10.719	8.312e-27
14	9558599	10095424	9612769	A	G	82521	-9.204	3.435e-20
14	10260072	10338052	10260072	T	C	186002	7.716	1.203e-14
14	10471191	10978093	10853919	T	TC	197353	8.186	2.709e-16
14	11410606	11410606	11410606	A	G	109754	5.777	7.593e-09
14	13637884	13637890	13637884	T	C	39353	5.688	1.288e-08
14	43910271	43910271	43910271	A	G	79824	-14.258	4.02e-46
14	48420302	48533009	48457812	A	G	259085	-8.935	4.063e-19
14	61490330	62164222	61927761	A	G	180534	-8.523	1.555e-17
14	62171435	62669791	62669791	T	C	178847	-8.75	2.129e-18
14	63042333	63526933	63173429	C	G	171130	11.114	1.069e-28
14	64019591	64132982	64132982	T	C	117367	-11.677	1.671e-31
14	64230926	65074294	64656897	C	G	110071	11.917	9.649e-33
14	65173186	65502497	65375286	A	G	111372	11.686	1.507e-31
14	66005158	66585083	66240345	C	G	259085	-8.395	4.67e-17
14	66860105	67154667	67086126	A	C	171130	-9.928	3.153e-23
14	67604188	68062250	67636377	T	C	114287	8.275	1.284e-16
14	68257903	68257903	68257903	A	C	247399	5.475	4.373e-08
14	68840162	68875064	68870339	T	G	172402	-8.721	2.749e-18
14	69786420	70092531	70018524	A	G	187311	-8.492	2.023e-17
14	70593248	70929338	70593248	A	C	177454	-7.018	2.247e-12
15	51152829	51577290	51232544	A	G	253441	-6.84	7.901e-12
15	52215531	52762062	52380438	T	C	254997	-10.512	7.593e-26
15	52779030	53404692	53273116	A	AAAG	251323	-11.197	4.194e-29
15	53775735	53775735	53775735	T	C	255808	6.888	5.649e-12
15	54365710	54428862	54365710	T	C	215016	-6.125	9.069e-10
15	65278877	65320533	65278877	A	G	259085	6.908	4.904e-12
15	72965538	73417273	72988390	C	G	197571	6.158	7.36e-10
15	73957222	73958744	73957222	T	C	259085	12.156	5.311e-34
15	74464738	74624240	74624240	A	G	190008	6.428	1.289e-10
16	107186	107186	107186	T	TC	16181	-5.865	4.482e-09
16	261001	675785	631440	A	G	17969	-6.206	5.443e-10
16	1786132	1791556	1786132	T	C	259085	-15.342	4.03e-53
16	2445265	2445265	2445265	A	G	256156	5.816	6.01e-09
16	65345117	65347828	65345117	A	AGTT	250873	-6.618	3.653e-11
16	66214002	66289262	66248708	A	G	259085	17.664	7.943e-70
16	66864368	66885191	66885191	T	C	259085	-5.673	1.404e-08
16	77215087	77227336	77222937	A	G	102845	7.236	4.621e-13
17	17745985	17786507	17764810	T	C	259085	-6.958	3.458e-12
17	29511667	29594281	29515056	A	G	259085	-6.579	4.749e-11
17	32772492	32772492	32772492	A	G	55785	-5.913	3.353e-09
17	55378088	55393730	55378715	T	C	259085	-6.026	1.683e-09
17	59407992	59438100	59415995	A	G	259085	-5.664	1.481e-08
18	40426516	40780395	40447338	A	G	82981	-10.796	3.593e-27
18	55334477	55407200	55406971	A	G	257297	-5.769	7.953e-09
18	56499635	56499635	56499635	T	C	237386	5.899	3.661e-09
18	56641083	57139621	57139251	A	AGG	218508	6.4	1.557e-10
18	57689072	58012565	57739382	A	T	221865	7.344	2.072e-13
18	59365058	59365058	59365058	A	C	190999	5.764	8.235e-09
18	59967004	60085291	60017404	A	AT	185685	6.32	2.613e-10
18	60981417	61009065	60985166	T	C	244582	-5.583	2.362e-08
19	9184298	9706744	9224986	T	C	249032	-5.755	8.654e-09
19	10010156	10299143	10269953	C	G	249032	6.995	2.65e-12
19	13314143	13330602	13330602	A	AC	25718	5.735	9.767e-09
19	13355048	13836691	13836691	C	G	16181	6.123	9.155e-10
19	24915221	24915221	24915221	A	G	86248	-7.117	1.104e-12
19	26944405	26944405	26944405	A	G	79824	6.713	1.91e-11
19	32908744	32957315	32909602	A	G	249032	-6.657	2.793e-11
19	34513617	34671006	34652530	A	G	249032	-8.032	9.551e-16
19	41053004	41053004	41053004	T	C	249032	-5.518	3.437e-08
19	42159854	42405253	42268909	A	G	249032	-8.712	2.985e-18
19	48227998	48240636	48228238	A	T	16181	7.818	5.367e-15
19	48979929	48980789	48980789	A	G	249032	-5.555	2.775e-08
19	49381425	49679068	49599828	A	G	242608	-6.952	3.612e-12
19	49886178	50198903	50198788	A	G	237663	-8.289	1.146e-16
19	50695215	50780248	50718666	T	C	249032	13.709	8.934e-43
19	51224240	51650439	51224240	C	G	209115	7.187	6.609e-13
19	51742065	51852979	51797454	A	G	171316	-6.283	3.329e-10
20	232100	240754	232521	T	C	130139	-9.216	3.093e-20
20	4853462	4853462	4853462	T	C	257944	5.47	4.501e-08
20	24892426	24892426	24892426	G	GTATGTA	121446	7.752	9.048e-15
20	25865184	26474597	26036605	A	AAC	259085	7.111	1.151e-12
20	26571635	26705105	26676373	CCTCTGG	C	240820	-6.975	3.052e-12
20	26770969	27410278	27216461	A	G	184526	-7.634	2.27e-14
20	27709815	28033797	27910772	T	C	209896	-9.396	5.649e-21
20	28427517	28902666	28427517	T	C	181369	7.043	1.886e-12
20	29177543	29837341	29406443	T	C	259085	9.776	1.431e-22
20	30313957	30629800	30350496	A	AAT	160189	15.996	1.353e-57
20	30733060	31275486	31130641	A	G	140656	-18.998	1.764e-80
20	31888449	31888449	31888449	A	T	218367	33.246	2.32e-242
20	32388973	33131550	32654245	A	G	124526	13.831	1.647e-43
20	33161443	33611947	33161443	T	C	217622	-13.236	5.401e-40
20	33753373	34237282	33753373	A	G	259085	11.484	1.58e-30
20	34258070	34375935	34258070	T	C	16181	-7.448	9.484e-14
20	34831410	34899333	34884561	A	C	169661	-9.619	6.638e-22
20	35517051	36029258	35517051	C	G	181369	7.124	1.045e-12
20	36113639	36610520	36113639	T	C	259085	7.325	2.397e-13
20	36617523	37170000	36620749	A	T	247908	6.677	2.435e-11
20	37278096	37349354	37349354	A	AC	249732	-6.057	1.387e-09
20	39223104	39230914	39230914	A	G	259085	6.102	1.051e-09
20	56014549	56051786	56051786	T	C	213875	-6.012	1.828e-09
20	56127150	56820646	56623364	A	G	86683	7.688	1.491e-14
20	57376677	57376677	57376677	T	C	236800	5.541	3.012e-08
20	60139732	60140187	60139732	A	G	47653	6.974	3.072e-12
21	4098536	4098536	4098536	T	G	79824	7.837	4.606e-15
21	39016265	39264064	39016265	T	G	213875	-5.962	2.487e-09
21	39751317	40355203	40161131	T	TAGC	181369	-6.206	5.44e-10
21	40838217	41028992	41028992	T	G	213875	-5.624	1.868e-08
21	41233855	42011745	41534656	T	TA	183505	-6.496	8.252e-11
21	50436563	50436563	50436563	A	G	109858	-8.032	9.586e-16
22	25016	56977	25016	T	C	79824	-18.83	4.261e-79
22	47374296	47498283	47403022	A	T	172402	5.722	1.051e-08
22	47910188	48049571	47910188	T	C	216572	-5.585	2.336e-08
22	50483330	50558311	50483330	C	G	236160	5.95	2.683e-09
22	51006528	51285537	51285537	T	TCA	180534	5.635	1.746e-08
23	15693985	16076270	16076270	C	G	124143	5.767	8.071e-09
23	16383388	17317334	16880032	T	G	113481	6.983	2.881e-12
23	17448489	17465117	17455509	A	G	246258	5.792	6.937e-09
23	27241969	27595163	27241969	T	TTCA	249032	-6.607	3.923e-11
23	27757789	27765031	27757789	A	G	37558	-5.499	3.825e-08
23	31395498	31719005	31564890	T	C	244470	6.78	1.199e-11
24	34577805	34875627	34601291	T	C	241116	6.744	1.54e-11
24	52420646	52420646	52420646	A	G	79824	-7.366	1.761e-13
24	55412368	55412368	55412368	T	C	79824	5.686	1.3e-08
24	58290168	58312771	58301200	A	G	259085	6.818	9.26e-12
25	24514839	24523849	24523849	A	G	82981	-7.536	4.855e-14
25	35471378	35952822	35608851	A	G	240975	-6.621	3.579e-11
26	19617337	20111750	19763097	T	C	79824	5.969	2.389e-09
26	20492523	20681138	20627365	A	G	259085	8.62	6.72e-18
26	21267450	21287713	21273073	A	C	259085	15.225	2.431e-52
26	21782644	21926351	21926351	A	G	257297	-6.026	1.683e-09
26	22033049	22474620	22469765	T	C	259085	-7.217	5.315e-13
26	22521923	23195851	22984290	A	G	233551	8.465	2.556e-17
26	23567718	23849499	23638761	T	C	219729	-6.437	1.215e-10
26	32879628	32879628	32879628	A	G	82521	-8.85	8.729e-19
26	39701672	39795817	39726067	T	C	259085	-7.728	1.094e-14
27	35631388	35942925	35631388	T	C	259085	-6.125	9.054e-10
27	36442395	36558128	36514654	C	G	259085	24.416	1.17e-131
27	37266027	37792323	37728088	A	G	45865	-6.333	2.409e-10
27	38374581	38374581	38374581	A	G	17969	-5.892	3.823e-09
29	9486040	9516570	9515475	T	C	259085	8.302	1.024e-16
29	39586861	39850343	39844583	A	C	183505	-6.365	1.951e-10
29	39987200	40458312	40439500	T	C	259085	-7.014	2.309e-12
29	40666856	41480458	41018349	T	C	184526	-8.93	4.278e-19
29	41538908	41708718	41630731	C	G	205540	8.433	3.361e-17
29	42852465	43135301	43030995	T	C	181369	-6.193	5.904e-10

## Sheet: SuppTable5e-MetaGWAS-QTL-PC
Supp Table 5e. Meta-GWAS QTL for protein content (PC)
chr	start	end	topVariant	effectAllele	otherAllele	nRecords	Zscore	Pvalue
1	2131471	2171775	2136192	T	C	245942	-6.079	1.207e-09
1	72366801	72366801	72366801	T	C	80983	-5.973	2.333e-09
1	89511890	89577461	89536174	T	C	243245	6.591	4.361e-11
1	110142712	110142712	110142712	A	G	206473	5.587	2.316e-08
1	142806542	142888246	142864856	T	C	245942	-9.647	5.067e-22
1	152386273	152393426	152386273	T	C	245942	-12.827	1.157e-37
1	153009806	153010988	153010988	T	C	200569	5.686	1.303e-08
2	5837724	5873026	5837724	A	C	259155	5.959	2.537e-09
2	21246788	21255016	21255016	T	C	82981	-7.58	3.463e-14
2	23597173	23604833	23597173	T	TC	259155	-5.538	3.065e-08
2	125390604	125804123	125723684	T	G	239791	6.12	9.341e-10
2	127011510	127011510	127011510	A	G	82521	7.78	7.259e-15
2	128438225	128438225	128438225	C	G	259155	-5.491	3.99e-08
2	135537362	135710411	135710411	T	C	79824	-8.771	1.766e-18
3	5841215	5841215	5841215	T	C	178212	5.473	4.412e-08
3	7173428	7246388	7245675	A	G	250841	-6.365	1.951e-10
3	7868411	7955322	7939628	T	C	259155	-9.543	1.392e-21
3	9351446	9420411	9357238	T	C	259155	5.612	1.995e-08
3	9576170	10163288	9974548	A	G	234851	-6.894	5.438e-12
3	10705023	11295233	10869053	A	G	257372	-7.172	7.379e-13
3	11378799	11691348	11378799	A	G	255236	-5.889	3.889e-09
3	12236408	12236408	12236408	T	G	259155	6.182	6.334e-10
3	12676905	13186206	12741574	T	C	124449	8.429	3.499e-17
3	13252347	13408700	13337320	A	T	208119	-7.519	5.509e-14
3	13707567	14282874	13961561	A	C	195989	-10.72	8.168e-27
3	14791522	14923691	14816919	A	G	161822	-15.158	6.699e-52
3	15459107	15496472	15472860	T	G	195781	27.941	8.51e-172
3	15976954	16204266	15976954	A	G	259155	-13.882	8.106e-44
3	16503706	17036574	16558417	A	T	219686	-10.157	3.076e-24
3	17078295	17258140	17167742	T	TTC	259155	-9.696	3.13e-22
3	17883604	18468823	17998796	C	G	244987	-9.176	4.459e-20
3	18500808	18810956	18750135	A	G	215968	-6.518	7.126e-11
3	18973766	19394981	19394981	A	T	192978	7.952	1.832e-15
3	19677459	20405359	19905863	A	G	159686	8.194	2.529e-16
3	20407066	21164138	20719030	A	G	123231	8.128	4.373e-16
3	21560458	21661304	21661304	A	C	187146	-5.733	9.882e-09
3	22093911	22198925	22198925	A	G	213782	-7.664	1.809e-14
3	23226421	23834853	23572416	G	GT	226615	7.282	3.298e-13
3	24585251	24645376	24645376	C	G	170703	6.368	1.914e-10
3	25225469	25896460	25479422	C	G	257372	-6.741	1.578e-11
3	29066054	29066054	29066054	A	G	82904	5.628	1.821e-08
3	30474978	31278789	30841510	G	GACAGACAC	222135	-6.822	8.993e-12
3	31343281	31675152	31535086	T	G	259155	6.421	1.355e-10
3	31836644	32254348	32191165	C	G	259155	8.052	8.158e-16
3	32806183	33088913	33005288	A	G	170703	-7.06	1.661e-12
3	33097778	33757875	33591033	A	T	180457	-7.406	1.297e-13
3	34193986	34276371	34274095	T	G	252624	17.164	4.978e-66
3	34822605	35340841	34866907	T	C	183154	7.426	1.122e-13
3	35462811	36001365	35507054	T	G	259155	6.896	5.34e-12
3	36008838	36343517	36042456	T	G	186311	6.479	9.229e-11
3	43173307	43237345	43173307	T	C	259155	5.68	1.349e-08
3	79936367	80100600	80063452	T	TC	250841	7.256	3.99e-13
3	80431516	80605702	80605702	T	C	259155	-10.13	4.05e-24
3	81163555	81596506	81254974	A	G	183989	-6.469	9.876e-11
3	82568722	82588998	82587412	CCA	C	257372	6.181	6.358e-10
3	84583643	84608715	84583643	A	T	259155	6.168	6.932e-10
3	103110456	103302135	103225210	A	G	257372	5.698	1.214e-08
3	113167175	113167175	113167175	T	G	259155	5.585	2.334e-08
3	120255847	120255847	120255847	C	G	250841	5.829	5.565e-09
4	2040778	2040778	2040778	T	C	79824	-14.68	8.691e-49
4	5202106	5234727	5234727	T	C	37578	5.689	1.275e-08
4	20695633	21070853	20765749	A	G	244987	-5.698	1.209e-08
4	54637749	54719028	54648133	A	C	253301	-5.883	4.035e-09
4	55569542	55658093	55658093	A	G	220761	6.638	3.176e-11
4	77046264	77221075	77063332	T	C	253301	5.822	5.831e-09
4	91808640	91808640	91808640	A	T	242681	-5.667	1.457e-08
4	97951527	97956401	97953252	A	G	251518	-7.71	1.258e-14
4	99507780	99541382	99509431	T	C	253301	-5.864	4.52e-09
4	114390130	114426777	114390288	A	G	244987	-6.326	2.516e-10
5	6039829	6039829	6039829	T	C	96537	-6.17	6.832e-10
5	23506579	23622560	23507534	A	T	252624	-9.252	2.205e-20
5	24031188	24158482	24158482	A	G	249694	-6.121	9.286e-10
5	26347624	26347624	26347624	A	G	191145	5.522	3.356e-08
5	27399580	27399580	27399580	T	C	89880	5.54	3.026e-08
5	27848925	28374629	28116807	A	C	257372	6.236	4.48e-10
5	29293256	29604053	29381206	T	TG	218665	-9.791	1.236e-22
5	30144115	30515061	30201542	A	T	219686	-12.777	2.213e-37
5	30899727	31204916	31135435	T	G	179029	-16.627	4.449e-62
5	32121503	32331432	32123203	A	C	259155	10.973	5.151e-28
5	32632627	32879417	32735868	A	T	200737	8.926	4.406e-19
5	33419716	33710527	33419716	T	C	256075	-7.488	6.99e-14
5	34160099	34160099	34160099	A	T	89880	-5.815	6.061e-09
5	34772047	35494189	35000060	A	G	241186	-6.642	3.085e-11
5	35505141	35836685	35526350	T	C	259155	5.977	2.268e-09
5	55520768	55550339	55550339	T	C	259155	5.79	7.054e-09
5	70779929	70779929	70779929	T	G	79824	-5.474	4.4e-08
5	73722451	74309757	73997548	T	C	259155	6.621	3.561e-11
5	75249134	75598122	75321934	T	C	259155	-15.211	3.007e-52
5	75831433	75998432	75931010	T	C	257372	-7.492	6.785e-14
5	76602358	76692456	76665135	A	C	241375	-5.846	5.041e-09
5	77253748	77304417	77269169	T	G	234655	-6.453	1.098e-10
5	85520102	85552055	85531348	A	C	201794	-5.925	3.125e-09
5	86762071	86893593	86762082	A	G	170703	5.59	2.274e-08
5	89027101	89324601	89084567	T	C	225656	-6.469	9.878e-11
5	89605887	89605887	89605887	A	T	259155	-5.751	8.869e-09
5	90635597	91048519	90683163	A	G	259155	-8.455	2.802e-17
5	91889454	91982959	91911488	A	T	254215	9.486	2.397e-21
5	92753116	92954598	92788925	A	G	259155	-12.462	1.206e-35
5	93511207	93525109	93516066	T	C	201165	-20.659	8.18e-95
5	94051710	94422618	94125128	T	C	221295	10.686	1.178e-26
5	94643944	94686661	94643944	C	G	190980	-5.809	6.285e-09
5	95149144	95183027	95168978	T	C	259155	-5.716	1.091e-08
5	96011110	96011110	96011110	T	C	190980	5.816	6.031e-09
5	96259148	97038088	96662709	T	C	190980	-6.01	1.855e-09
5	103496903	103520236	103498648	T	G	259155	8.67	4.319e-18
5	109011728	109011728	109011728	T	C	252624	5.752	8.834e-09
5	110258912	110258912	110258912	T	C	259155	5.78	7.469e-09
5	111686578	111690586	111690586	T	C	259155	7.16	8.043e-13
5	112203430	112265697	112203430	T	C	82981	-9.922	3.339e-23
5	113487182	113487182	113487182	T	C	95657	-13.645	2.171e-42
5	115054135	115064035	115062748	T	C	252624	6.021	1.737e-09
5	116141471	116579556	116516054	T	C	252624	-8.634	5.908e-18
5	116975305	117179648	117150901	T	G	194804	-14.392	5.784e-47
5	118061268	118085140	118061268	A	G	3157	11.911	1.031e-32
5	118947224	118947224	118947224	A	C	3157	-9.982	1.833e-23
6	17821772	18172862	17857710	CA	C	10056	-6.103	1.044e-09
6	18442755	18630410	18442755	CAT	C	12753	5.843	5.121e-09
6	20223819	20223819	20223819	A	G	10056	-6.061	1.349e-09
6	21832636	22070550	22070550	A	C	10056	-5.855	4.763e-09
6	23186273	23515391	23515391	T	G	12753	5.55	2.86e-08
6	24275665	24723460	24275665	A	C	10056	5.842	5.156e-09
6	25446020	25731557	25446020	A	G	10056	-6.077	1.221e-09
6	27450316	27575752	27575752	A	G	7735	6.425	1.323e-10
6	29191059	29191059	29191059	T	C	43432	6.112	9.836e-10
6	30031461	30032757	30032757	T	C	69500	-6.22	4.971e-10
6	34662685	34695927	34693477	A	G	181292	7.501	6.326e-14
6	35048854	35484400	35484400	A	G	5551	-10.247	1.224e-24
6	36187388	36808072	36315603	CCCG	C	23342	-18.622	2.131e-77
6	37447851	37488548	37488548	A	T	183989	6.691	2.217e-11
6	37993188	37993188	37993188	A	G	10056	12.239	1.918e-34
6	38644825	38909485	38644825	T	G	10056	-11.373	5.732e-30
6	38923820	39748993	39627048	A	C	10056	-10.667	1.448e-26
6	39976359	39976359	39976359	T	C	10056	-10.274	9.272e-25
6	40484912	40484912	40484912	A	G	31793	7.112	1.141e-12
6	40592011	41247227	40592011	A	G	10056	-10.413	2.153e-25
6	41776171	41817350	41813932	C	G	10056	-9.91	3.751e-23
6	43465620	43921954	43467545	T	G	257372	-7.652	1.979e-14
6	58783279	58783279	58783279	T	TCTTC	259155	-5.837	5.303e-09
6	58793039	59620654	59287012	T	G	259155	-6.307	2.844e-10
6	76536969	76887927	76556648	A	C	254675	5.839	5.265e-09
6	77018264	77834448	77435631	T	C	247331	7.035	1.997e-12
6	77941530	78487136	78138540	A	C	249467	-6.794	1.088e-11
6	78666631	78666631	78666631	A	G	17969	-5.694	1.243e-08
6	79029112	79245090	79243683	A	T	2697	-6.633	3.292e-11
6	79347973	79830163	79830163	T	C	170401	7.619	2.565e-14
6	80264480	80412035	80412035	A	T	180074	9.779	1.383e-22
6	80460958	81026381	80955383	T	C	234498	12.801	1.626e-37
6	81457615	81680534	81579270	A	G	238029	9.435	3.924e-21
6	81703638	82445285	82186591	T	C	259155	10.227	1.499e-24
6	82952371	82993329	82955179	T	C	247331	13.691	1.151e-42
6	83545664	83665328	83545664	T	C	236634	16.191	5.796e-59
6	84215721	84222848	84216543	A	G	259155	16.031	7.737e-58
6	84840750	84840750	84840750	A	ACACC	19343	-15.958	2.51e-57
6	85424759	85684994	85424759	A	G	183788	-30.691	7.48e-207
6	86127635	86448746	86127635	A	G	145285	17.784	9.323e-71
6	86629270	86878639	86799200	A	G	198832	14.496	1.282e-47
6	87671325	88188478	87724210	A	G	208411	10.785	4.066e-27
6	88269476	88785504	88522637	G	GC	176254	-9.173	4.612e-20
6	89063150	89064547	89063150	A	AGTT	219686	7.154	8.432e-13
6	91160631	91586282	91160631	A	C	22040	-7.881	3.243e-15
6	92354490	92533558	92355549	A	T	16186	5.757	8.539e-09
6	94099365	94099365	94099365	A	G	259155	5.493	3.95e-08
6	111688769	111688769	111688769	A	G	82981	9.456	3.194e-21
7	7547908	7547908	7547908	A	G	21126	5.471	4.479e-08
7	11875254	12009313	11875254	T	C	79824	5.854	4.807e-09
7	12401729	12699868	12559240	T	G	257372	-7.18	6.957e-13
7	15893212	15957756	15957756	T	G	259155	5.893	3.79e-09
8	5488332	5507314	5506995	A	G	259155	5.655	1.557e-08
8	39262529	39751653	39476482	C	G	259155	8.957	3.349e-19
8	39986680	39986680	39986680	T	G	243625	6.14	8.267e-10
8	41792097	41994719	41968499	A	T	206030	5.809	6.285e-09
8	74604822	75202790	74831025	A	C	28784	-5.825	5.695e-09
9	10505341	10599578	10535112	A	G	259155	-7.296	2.968e-13
9	25528726	25528726	25528726	A	T	257372	-5.462	4.699e-08
9	26184559	26232463	26209292	T	C	259155	11.545	7.82e-31
9	46139447	46139447	46139447	A	T	97695	7.823	5.173e-15
9	61887636	61887636	61887636	A	G	79824	-5.995	2.036e-09
9	86387581	86463228	86436510	T	C	259155	7.93	2.187e-15
9	87445875	87445875	87445875	T	C	224832	-5.621	1.899e-08
9	94204702	94236891	94233819	T	C	183989	-5.77	7.919e-09
9	95145950	95199414	95191148	A	AATATT	257996	-6.575	4.877e-11
10	2137692	2194469	2194197	T	G	255998	-7.501	6.314e-14
10	19122303	19139584	19127911	T	C	255998	-5.713	1.112e-08
10	33524221	33765888	33524221	A	T	96010	8.779	1.653e-18
10	34928275	35126503	34928275	A	G	79824	6.622	3.547e-11
10	44470307	44781286	44655494	T	C	183989	6.834	8.25e-12
10	44828861	45506805	45284038	T	G	255998	8.247	1.626e-16
10	45795771	46018496	46014567	T	G	202810	-11.323	1.005e-29
10	46290085	46548638	46535633	A	G	254215	21.036	3.08e-98
10	47296198	47517325	47516886	A	G	255998	8.157	3.444e-16
10	48128889	48425872	48203369	A	G	255998	5.994	2.045e-09
10	53236958	53395101	53277525	T	C	255998	-5.53	3.201e-08
10	53704767	54056085	53902761	T	C	79824	-6.473	9.588e-11
10	62221106	62256872	62221106	T	C	255998	7.927	2.247e-15
10	65985415	65993499	65985415	T	C	50350	6.657	2.802e-11
10	68100073	68100073	68100073	T	G	79824	-5.933	2.967e-09
10	74906378	74906378	74906378	A	G	12753	5.475	4.364e-08
10	87184346	87186302	87184346	A	C	255998	5.494	3.935e-08
11	13792896	13829374	13829374	T	G	242858	-5.632	1.786e-08
11	14839445	15009759	14918525	A	G	226615	8.598	8.125e-18
11	20906375	21050553	21041090	T	C	259155	9.33	1.059e-20
11	21579438	21584992	21579438	A	C	224832	5.555	2.775e-08
11	22185246	22211968	22185246	C	G	247798	6.11	9.949e-10
11	28571662	28573990	28571662	A	G	82521	5.463	4.675e-08
11	30270877	30290785	30280784	T	C	259155	8.908	5.21e-19
11	61081592	61147076	61095465	T	C	252624	5.844	5.106e-09
11	61261512	61671852	61659966	T	C	175036	-6.237	4.461e-10
11	62119194	62477833	62197479	T	C	234655	11.086	1.472e-28
11	62705618	62785725	62705618	A	T	204808	-7.921	2.347e-15
11	63239033	63634488	63557329	T	C	259155	-12.557	3.636e-36
11	64057703	64557175	64097142	T	C	259155	-6.214	5.166e-10
11	65897000	65931079	65931079	A	G	181292	5.609	2.038e-08
11	76498139	76498139	76498139	A	T	86355	-5.718	1.08e-08
11	87639565	87726955	87673502	A	G	250841	-5.702	1.185e-08
11	103241182	103241182	103241182	A	G	249653	-5.628	1.824e-08
11	104161844	104187636	104176479	A	C	259155	-16.532	2.165e-61
11	104692408	104864845	104692408	A	G	23746	6.175	6.601e-10
11	106787988	106787988	106787988	T	C	130597	-5.68	1.346e-08
12	69629021	69754991	69665926	T	G	37214	7.856	3.966e-15
12	70341071	70771126	70341450	T	G	17969	8.773	1.744e-18
12	70835998	70836371	70836319	T	G	16186	6.472	9.685e-11
12	71562634	71842435	71620645	C	G	227059	6.27	3.619e-10
12	72558203	72867813	72575511	C	G	8314	6.08	1.203e-09
12	73116193	73720626	73466311	A	G	259155	10.394	2.632e-25
12	73972462	74412120	73972462	A	AATTG	186125	5.845	5.068e-09
12	76399929	76415850	76415850	A	AT	259155	-5.775	7.711e-09
13	15927893	15927893	15927893	T	C	259155	5.464	4.664e-08
13	38156064	38184574	38180425	A	G	259155	-5.669	1.437e-08
13	43060399	43062365	43062365	A	G	242593	-5.752	8.817e-09
13	45512838	45872163	45784236	A	G	183927	-7.015	2.294e-12
13	46364700	46387065	46377842	A	G	257372	-10.004	1.457e-23
13	47053008	47500230	47070574	T	C	220601	6.421	1.351e-10
13	47653266	47867333	47683423	A	G	187146	-6.211	5.267e-10
13	51426501	51504463	51494064	A	G	257372	5.579	2.421e-08
13	64086740	64257152	64240796	A	G	259155	5.805	6.439e-09
13	65566356	65566356	65566356	A	C	258008	5.614	1.976e-08
14	264797	711035	520652	A	C	141486	52.165	1.91e-593
14	1065542	1362245	1187315	A	G	96116	36.477	2.54e-291
14	1688550	1818795	1760890	T	C	140056	30.519	1.45e-204
14	2302055	2800547	2302055	T	C	251477	-16.468	6.28e-61
14	2916427	3571715	3426529	T	C	252624	12.937	2.797e-38
14	3800997	4128491	3806718	T	C	259155	9.431	4.067e-21
14	5532919	6268356	5782719	A	G	167623	7.799	6.217e-15
14	6332276	6357920	6332276	A	C	180909	-7.034	2.002e-12
14	6647790	6960633	6953973	T	G	259155	8.125	4.489e-16
14	7857053	8262380	7857053	A	ATGAACTGATCGCTCCT	186202	-8.507	1.784e-17
14	8412605	8412605	8412605	T	G	243165	-5.486	4.111e-08
14	8588411	9397828	8976085	T	C	176106	-7.829	4.9e-15
14	9482400	10074864	9482400	A	G	120098	6.324	2.547e-10
14	48419172	48533009	48435311	A	T	259155	11.539	8.429e-31
14	49278603	49278603	49278603	T	C	184449	-5.502	3.752e-08
14	55588460	55588460	55588460	A	T	254675	-5.516	3.463e-08
14	56263075	56492051	56453940	T	C	171068	6.21	5.293e-10
14	61090338	61272415	61272415	T	C	187146	-7.528	5.166e-14
14	61490330	61927761	61927761	A	G	117291	-9.597	8.212e-22
14	62164222	62669791	62532498	T	C	130411	-11.463	2.016e-30
14	63042333	63526933	63173429	C	G	107902	14.763	2.552e-49
14	64019591	64132982	64132982	T	C	110982	-16.437	1.032e-60
14	64230926	65074294	64656897	C	G	110008	19.057	5.727e-81
14	65173186	65502497	65375286	A	G	111309	18.692	5.72e-78
14	65880922	65951328	65916772	A	T	112940	9.182	4.232e-20
14	66005158	66967250	66482773	A	G	116020	-11.737	8.191e-32
14	67013495	67154667	67090738	A	G	107902	11.227	3.011e-29
14	67615614	67933964	67670493	A	AC	107902	-11.666	1.91e-31
14	68172475	68325644	68265884	A	G	241146	6.531	6.545e-11
14	68426997	69060770	68870339	T	G	109173	-9.426	4.243e-21
14	69491080	69491080	69491080	A	G	206473	-6.47	9.821e-11
14	69634510	70092531	70079014	T	C	111309	-8.397	4.578e-17
14	70365652	70929338	70717396	A	G	169783	-9.517	1.78e-21
15	15678176	15783245	15682095	T	G	259155	7.791	6.66e-15
15	26484932	26806707	26746514	T	C	214809	8.031	9.657e-16
15	27001328	27356020	27356020	C	G	219686	-11.791	4.334e-32
15	27782410	28253174	27929245	A	G	226739	14.895	3.53e-50
15	28429747	28691118	28447946	A	T	246322	9.708	2.794e-22
15	28994874	29092893	29092893	A	AAAAAAGTACATT	181292	6.87	6.429e-12
15	30283821	30367642	30356324	A	G	219686	5.662	1.498e-08
15	30507724	31214867	30885776	A	G	210840	7.191	6.437e-13
15	31422889	31422889	31422889	T	C	176254	-6.089	1.139e-09
15	50913001	51372957	51232544	A	G	253516	-7.901	2.777e-15
15	52000129	52000129	52000129	T	C	141989	9.371	7.192e-21
15	52145639	52770087	52509408	C	G	196673	12.554	3.769e-36
15	52779030	53571260	53273952	A	T	188018	-13.518	1.229e-41
15	53775735	53853516	53853516	A	C	228675	-6.924	4.383e-12
15	53964893	54851989	54397591	A	C	213832	-7.404	1.318e-13
15	54911709	55037844	54939222	C	G	136726	-5.921	3.205e-09
15	55543334	55732593	55732593	A	G	226665	-6.465	1.015e-10
15	65127850	65127850	65127850	T	G	259155	5.825	5.704e-09
16	91808	292494	107186	T	TC	16186	-6.711	1.934e-11
16	893412	1277317	1135901	T	C	256225	-7.449	9.405e-14
16	1786132	1791556	1790685	A	G	194804	22.506	3.61e-112
16	2294420	2445265	2396677	T	C	259155	-6.369	1.908e-10
16	2789660	3160359	3022529	T	C	259155	-7.542	4.638e-14
16	3674705	4026330	3822426	A	G	259155	-6.175	6.607e-10
16	4111159	4689488	4551990	T	C	257996	8.257	1.499e-16
16	6228761	6228761	6228761	A	G	41213	5.83	5.53e-09
16	8656171	8656171	8656171	T	C	250841	5.596	2.197e-08
16	24266180	24286798	24278508	A	G	259155	7.949	1.886e-15
16	39149841	39171127	39149841	T	C	218301	5.748	9.02e-09
16	39904649	40160690	39960113	A	T	259155	7.402	1.343e-13
16	41275043	41278477	41278477	T	TA	259155	-5.893	3.794e-09
16	41624236	41965743	41876226	A	G	259155	-6.203	5.539e-10
16	59276431	59405889	59333108	A	C	259155	-7.458	8.804e-14
16	66214002	66289262	66248708	A	G	259155	10.293	7.58e-25
16	73523921	73617327	73539440	A	G	259155	-7.648	2.037e-14
17	6036384	6164099	6036384	T	G	62496	-5.867	4.429e-09
17	17745985	17786507	17764810	T	C	259155	-7.035	1.992e-12
17	44453570	44455515	44455515	A	G	180163	-5.554	2.796e-08
17	53326881	53363863	53326881	T	C	259155	-6.626	3.446e-11
17	54050643	54060473	54060473	C	G	259155	5.589	2.289e-08
17	55378088	55393730	55382323	A	G	257372	6.671	2.545e-11
17	62929529	63123378	62988994	T	G	259155	-7.081	1.431e-12
17	68824511	69294468	69262096	A	G	181292	7.148	8.814e-13
18	1575033	1672924	1652208	A	G	250841	-7.371	1.688e-13
18	2154534	2180057	2175940	T	C	259155	-11.805	3.664e-32
18	16726917	16818513	16810602	T	C	259155	-6.682	2.355e-11
18	36639805	36842088	36782293	A	G	256458	12.359	4.357e-35
18	40426516	40780395	40447338	A	G	82981	-16.799	2.494e-63
18	50451149	50478738	50451787	A	G	257372	5.788	7.135e-09
18	52689078	52689078	52689078	A	C	250841	-5.515	3.478e-08
18	54833141	54834660	54834660	A	G	259155	-5.743	9.324e-09
18	55057383	55743918	55336295	A	G	250841	6.233	4.588e-10
18	55838118	55838118	55838118	A	C	188305	-5.509	3.618e-08
18	56563405	56641083	56641083	T	G	187146	-6	1.973e-09
18	57689072	57881008	57816137	T	C	221822	-6.171	6.776e-10
19	8359472	8722841	8359472	A	G	96203	-6.928	4.28e-12
19	9026478	9383808	9224986	T	C	259155	-7.651	1.987e-14
19	10028182	10421555	10028182	T	G	106792	6.826	8.738e-12
19	24915221	24915221	24915221	A	G	86355	-11.512	1.146e-30
19	26334462	26384309	26383644	A	G	259155	-5.842	5.155e-09
19	26944405	26944405	26944405	A	G	79824	12.104	1.009e-33
19	28354581	28419322	28358790	T	C	219152	-6.261	3.825e-10
19	29111501	29538117	29212426	A	G	219686	5.985	2.17e-09
19	29774985	29774985	29774985	A	C	238656	-5.475	4.372e-08
19	32204274	32210977	32207570	T	C	183505	6.87	6.431e-12
19	32881008	32950705	32900515	T	C	252624	9.626	6.192e-22
19	33500839	33881241	33881241	G	GCT	181292	-5.965	2.449e-09
19	34489235	34671006	34652530	A	G	259155	-7.775	7.538e-15
19	35467904	35834948	35802203	A	G	259155	5.642	1.682e-08
19	40766465	41033188	40766465	A	AC	259155	-6.077	1.223e-09
19	41403265	41766769	41765943	A	G	257372	-7.464	8.368e-14
19	41916122	42459120	42268909	A	G	259155	-13.665	1.642e-42
19	42772424	43328405	42954002	T	G	181933	6.302	2.938e-10
19	44196568	44222177	44196568	A	C	257372	-6.413	1.428e-10
19	45233128	45233128	45233128	T	C	145781	5.716	1.089e-08
19	45853531	45914088	45882109	A	G	144002	6.086	1.156e-09
19	48247526	48634370	48634370	T	C	99694	-7.519	5.53e-14
19	49461764	49575433	49513665	T	C	259155	-7.574	3.616e-14
19	50014424	50133728	50122971	T	C	240631	-6.166	7.016e-10
19	50783866	50838566	50807156	G	GA	259155	10.351	4.149e-25
19	51414666	51755002	51583761	CTGGT	C	252624	-7.039	1.932e-12
19	53219349	53219988	53219988	A	G	259155	-5.823	5.781e-09
19	54477725	54488310	54488310	A	G	259155	-5.874	4.266e-09
19	56454067	56498948	56491504	C	G	259155	6.195	5.816e-10
19	60413454	60561566	60560812	T	G	259155	-8.082	6.385e-16
20	234304	239771	236832	T	C	183055	-6.277	3.452e-10
20	12928425	12928425	12928425	A	G	241186	-5.649	1.612e-08
20	23157301	23157301	23157301	C	G	37578	-5.571	2.531e-08
20	23962519	24144109	23962519	A	C	53185	-5.906	3.501e-09
20	24892426	24892426	24892426	G	GTATGTA	121369	8.326	8.384e-17
20	25465658	25465658	25465658	A	G	100469	6.262	3.808e-10
20	26014701	26317976	26036605	A	AAC	259155	8.527	1.499e-17
20	26574322	26682390	26676373	CCTCTGG	C	240785	-5.94	2.848e-09
20	26810246	27390765	27197716	T	C	184449	9.68	3.677e-22
20	27469999	28033797	27910772	T	C	209926	-11.075	1.657e-28
20	28427517	28869071	28427517	T	C	181292	9.055	1.367e-19
20	29183805	29812603	29377582	A	G	259155	-13.206	8.049e-40
20	29982998	30629800	30313957	T	G	153823	-18.381	1.851e-75
20	30733060	31374363	31130641	A	G	104990	-25.087	6.93e-139
20	31888449	32018037	31888449	A	T	161458	45.849	5.96e-459
20	32423913	33131550	32713598	T	C	118126	-21.087	1.06e-98
20	33285741	33757889	33445571	T	C	150408	-20.005	5.01e-89
20	34009565	34237282	34102226	T	C	247791	-16.688	1.593e-62
20	34831410	35318526	34831410	A	G	178212	-13.453	2.951e-41
20	35335434	35853215	35517051	C	G	181292	12.092	1.166e-33
20	36113639	36613614	36113639	T	C	259155	11.306	1.22e-29
20	36614623	36838717	36620512	T	C	235872	-10.772	4.654e-27
20	37121660	37657721	37573676	A	ATGAT	259155	-8.7	3.331e-18
20	37811611	38759885	38267309	T	G	240027	8.893	5.964e-19
20	38821372	39230599	38981385	A	G	246322	7.784	7.01e-15
20	39585725	40218237	40009699	A	C	259155	7.769	7.89e-15
20	40592230	40592230	40592230	C	G	233766	5.487	4.098e-08
20	43127832	43127832	43127832	C	G	92657	-8.435	3.324e-17
20	43628082	43628082	43628082	T	C	236266	5.77	7.918e-09
20	56014549	56152724	56132402	T	G	216989	8.376	5.493e-17
20	56489500	56671924	56656287	T	G	216529	-10.417	2.065e-25
20	57186709	57498431	57366753	T	C	259155	-7.592	3.142e-14
20	58187722	58475705	58307003	T	C	250841	-6.649	2.954e-11
20	70010112	70124134	70024441	T	G	259155	-7.857	3.926e-15
21	7896744	7953117	7899428	A	G	259155	6.774	1.257e-11
21	8653870	8771116	8764840	A	G	259155	10.373	3.307e-25
21	38597417	38754777	38619914	A	C	213832	-5.703	1.177e-08
21	38912860	39264064	39264064	T	C	181292	7.616	2.627e-14
21	39751317	40355203	39909526	A	AGATAATTTTAAATGCAAAGG	181292	-7.687	1.501e-14
21	40410991	40888484	40447341	A	G	213832	-6.474	9.552e-11
21	41534656	42011745	41534656	T	TA	183428	-7.766	8.116e-15
21	42063369	42179998	42071112	A	G	197282	6.653	2.879e-11
21	50436563	50766874	50436563	A	G	109844	-11.613	3.541e-31
21	50974481	50974481	50974481	A	G	136668	-6.001	1.966e-09
22	25016	56977	25016	T	C	79824	-10.293	7.596e-25
22	10752682	10915891	10792386	T	G	259155	7.038	1.954e-12
22	47696160	47832710	47832710	A	G	247331	5.903	3.568e-09
22	50644364	50663618	50644364	A	G	259155	5.69	1.274e-08
22	51936154	51936154	51936154	A	G	190429	5.549	2.866e-08
23	13825137	13890778	13828383	T	C	216529	-6.42	1.364e-10
23	13918220	14713049	14402799	A	G	178212	-6.988	2.783e-12
23	15309020	15568008	15316237	C	G	178212	-6.47	9.829e-11
23	15693985	16076270	16076270	C	G	117743	9.471	2.776e-21
23	16839261	17317334	16839261	A	G	117743	-10.582	3.617e-26
23	17448489	17747108	17465117	A	C	147586	-7.808	5.798e-15
23	18067921	18320374	18067921	T	C	191015	-6.336	2.352e-10
23	18563437	19299886	19032486	A	G	111870	-6.826	8.713e-12
23	28451576	28451576	28451576	A	G	86355	-6.301	2.956e-10
23	30732472	30732472	30732472	T	C	250841	5.49	4.022e-08
23	31346820	31845166	31372953	C	G	259155	6.178	6.493e-10
23	31912167	31912167	31912167	A	G	223918	5.715	1.095e-08
23	44604682	44644184	44644184	A	C	207251	6.066	1.312e-09
23	45156640	45188845	45185418	T	TG	234128	9.01	2.067e-19
23	49560930	49573355	49572146	A	G	205468	-6.267	3.672e-10
23	50067371	50736314	50286643	A	G	166715	-6.299	3.003e-10
23	51069239	51466211	51252204	A	G	259155	12.048	1.988e-33
23	51770099	52311256	51893377	A	G	181292	-7.108	1.175e-12
23	52420999	52420999	52420999	A	G	107746	5.625	1.858e-08
24	25143228	25350941	25200232	T	C	259155	9.217	3.055e-20
24	51610869	51610869	51610869	A	AG	79824	-5.966	2.435e-09
24	52420646	52420646	52420646	A	G	79824	-11.536	8.675e-31
24	55412368	55412368	55412368	T	C	79824	9.309	1.292e-20
24	58290168	58326910	58304637	T	C	257372	11.238	2.662e-29
24	60252154	60252154	60252154	T	G	250841	5.461	4.725e-08
24	60659677	60862435	60862435	A	G	252624	-7.312	2.636e-13
25	8705403	8725737	8725737	A	G	118374	-6.21	5.294e-10
25	9284558	9294669	9294669	A	G	104030	-7.069	1.565e-12
25	13554716	13554716	13554716	A	T	172839	-5.476	4.342e-08
25	13671132	14072118	14072118	A	G	173400	5.872	4.296e-09
25	26048428	26054980	26051176	A	G	240039	-6.651	2.912e-11
25	27121458	27713634	27394217	T	C	259155	-6.285	3.283e-10
25	36080286	36083464	36083464	T	C	126033	-9.739	2.063e-22
25	37055428	37055428	37055428	T	C	43129	-5.603	2.105e-08
25	37789144	37855898	37820730	T	C	259155	-6.761	1.367e-11
25	38354009	38354009	38354009	A	G	184449	5.49	4.009e-08
25	38487010	39023575	38935153	C	G	252624	-6.225	4.823e-10
26	18178728	18335061	18250011	A	C	82981	5.949	2.705e-09
26	19095207	19102361	19102361	T	C	97793	-7.278	3.384e-13
26	21267450	21287713	21272422	T	C	259155	7.411	1.25e-13
26	22310476	22547329	22539102	CTCTG	C	258008	10.015	1.308e-23
26	22567799	23072143	23049604	T	TG	259155	-13.136	2.043e-39
26	23567718	24022538	23603232	T	C	257372	-6.894	5.426e-12
26	30552780	30563351	30552780	A	C	259155	-5.999	1.98e-09
27	25064178	25064178	25064178	A	G	47653	5.516	3.466e-08
27	41388877	41413150	41391206	T	G	259155	-10.524	6.731e-26
28	34734186	35092728	35092728	CAA	C	259155	-6.049	1.455e-09
28	35611790	35673747	35617120	T	C	259155	-13.697	1.06e-42
28	36150307	36310539	36153658	A	G	53185	6.201	5.596e-10
28	41661353	41681479	41665395	A	C	259155	-5.707	1.151e-08
29	8570747	8994867	8752082	T	C	259155	5.969	2.384e-09
29	9486040	9516570	9515475	T	C	259155	18.704	4.579e-78
29	10074402	10259383	10216866	A	G	258008	-6.348	2.179e-10
29	10851824	11339220	10856828	A	G	259155	6.392	1.636e-10
29	11360128	11400671	11360128	A	T	259155	6.165	7.064e-10
29	37299284	37299284	37299284	A	G	183989	-5.566	2.605e-08
29	39208972	39284427	39265762	A	G	250371	6.704	2.032e-11
29	39586861	40163675	40021098	A	G	181292	-9.532	1.54e-21
29	40453355	40678539	40678526	A	G	125925	14.431	3.322e-47
29	40705365	41662742	41204759	A	G	130303	-15.401	1.621e-53
29	41708718	41740306	41708718	A	C	126739	-11.055	2.073e-28
29	41752002	42245387	42245387	A	G	144125	-11.852	2.11e-32
29	42721931	43438943	43030995	T	C	181292	-13.214	7.26e-40
29	43536407	43600591	43536407	T	C	181292	-9.535	1.495e-21
29	44038683	44481824	44056488	T	G	259155	-7.785	6.986e-15
29	44792051	45318788	44898243	A	G	256225	-7.706	1.296e-14
29	45518117	46351137	45947572	A	T	213832	7.301	2.847e-13
29	46451136	46729949	46465611	T	C	256849	6.961	3.369e-12
29	47205093	47371679	47371679	C	G	246322	-5.947	2.734e-09
29	48676330	48882010	48676330	T	C	252624	6.78	1.206e-11
29	49177435	49636299	49313717	A	G	252624	-6.229	4.695e-10
29	49640174	50350097	50137975	A	G	259155	-6.805	1.01e-11
29	50531670	50932909	50932820	T	C	202391	-7.048	1.814e-12

## Sheet: SuppTable5f-MetaGWAS-QTL-HFert
Supp Table 5f. Meta-GWAS QTL for heifer fertility (Hfert)
chr	start	end	topVariant	effectAllele	otherAllele	nRecords	Zscore	Pvalue
2	28940640	28940640	28940640	T	C	9861	-5.929	3.056e-09
2	119498231	119498231	119498231	T	C	8896	-5.613	1.993e-08
3	118021947	118173840	118173616	T	G	97062	-6.244	4.259e-10
3	119656174	119940025	119659021	T	C	68440	-6.134	8.571e-10
3	120014775	120981426	120501296	T	C	80759	-6.737	1.618e-11
4	49183142	49194415	49194415	T	C	31590	5.592	2.251e-08
6	89893721	89911131	89911131	A	G	82571	-5.863	4.538e-09
6	95759521	96167747	95759521	T	C	98741	-5.644	1.665e-08
6	96912566	96952575	96952575	A	G	60305	-5.596	2.197e-08
6	98788002	99053451	99053451	T	G	43500	-6.152	7.67e-10
6	99192219	99762394	99598131	C	G	46440	7.025	2.142e-12
6	99991836	100316951	100292104	T	C	41568	-7.452	9.187e-14
6	100861421	100861421	100861421	T	C	43500	9.809	1.025e-22
6	101417851	101516345	101429521	T	C	43500	11.273	1.775e-29
6	101732806	102115118	102075936	A	G	43500	11.539	8.436e-31
6	102678492	102971417	102678492	A	T	43500	9.415	4.738e-21
6	103179010	103491745	103215565	T	C	48943	-7.078	1.467e-12
7	85622349	86053226	86053226	T	C	63861	-6.079	1.213e-09
7	86865919	86865919	86865919	T	C	44071	-5.782	7.388e-09
7	87633948	87643119	87643091	A	G	34347	5.59	2.274e-08
7	88049225	88494374	88494374	C	G	41568	-6.09	1.129e-09
7	88876614	89108526	89051927	C	G	41568	-6.229	4.707e-10
7	89238523	90186302	89728165	T	C	44508	-6.803	1.023e-11
7	90255378	90945442	90713054	T	G	46440	-6.878	6.059e-12
7	91329745	91329745	91329745	T	C	46440	-6.289	3.189e-10
8	40218530	40265618	40218657	T	C	98741	-5.752	8.818e-09
9	48502442	48571295	48571295	T	C	46003	5.845	5.068e-09
9	48712589	49675052	49194163	A	G	46003	-6.276	3.479e-10
9	49700710	50045909	49941024	A	G	43500	5.877	4.18e-09
9	50489410	51002234	50916522	T	C	47110	-5.762	8.291e-09
10	49836090	49837441	49836090	A	C	49996	-5.49	4.012e-08
11	72786875	72842131	72786875	T	C	98741	-6.224	4.831e-10
11	79406313	79513885	79425098	T	C	98741	-5.738	9.567e-09
13	31748458	31759182	31748458	T	C	94788	-5.669	1.436e-08
13	62099326	62157483	62128255	A	G	98741	-5.927	3.083e-09
14	28442556	28442556	28442556	T	C	42874	5.484	4.155e-08
14	29461757	29923477	29461757	T	C	42874	5.751	8.858e-09
14	30898648	30960261	30898648	A	G	44828	-5.456	4.86e-08
14	31870708	31870708	31870708	T	C	61358	-5.808	6.336e-09
14	33931999	33931999	33931999	T	C	65773	-5.451	5e-08
14	37369191	37381905	37369191	T	C	97062	-5.682	1.33e-08
16	21980697	21980697	21980697	T	G	14003	-5.638	1.716e-08
17	63329574	63791885	63788303	A	G	3953	-5.579	2.419e-08
17	65264414	65459460	65459460	T	C	6893	-6.904	5.048e-12
17	65683270	65710435	65710435	A	G	7784	5.7	1.2e-08
17	66856556	66857522	66856556	C	G	1958	5.687	1.29e-08
17	70336480	70336480	70336480	A	G	6893	-6.024	1.7e-09
17	72019417	72019417	72019417	T	C	6893	-5.451	5e-08
18	46864084	46912566	46906753	T	C	98741	-5.777	7.606e-09
18	57109828	57136837	57109828	A	G	46440	6.167	6.943e-10
18	57689072	58222938	58058054	T	C	84525	-6.436	1.226e-10
18	59221018	59365058	59274833	A	G	46440	-7.077	1.469e-12
18	59645300	60444638	59967004	T	C	46440	-7.165	7.805e-13
18	60681505	60684880	60684880	T	C	46440	-5.615	1.967e-08
18	61896649	62225689	61896649	A	G	37436	-6.022	1.721e-09
18	62863411	63459553	63181463	A	G	38445	6.574	4.888e-11
19	27430014	27430014	27430014	C	G	83197	5.495	3.915e-08
19	30119738	30119738	30119738	G	GT	55314	-5.522	3.346e-08
19	34539271	34688814	34632517	A	C	98741	5.736	9.684e-09
19	49348113	49684685	49348113	T	TGCAC	2503	6.546	5.907e-11
19	51171397	51171397	51171397	T	C	2503	-6.283	3.325e-10
19	51754087	51754087	51754087	A	G	2503	5.67	1.431e-08
19	52057468	52411173	52292673	CCTT	C	2503	6.312	2.763e-10
19	53300443	53300443	53300443	A	G	2503	-5.581	2.39e-08
20	26833377	26833377	26833377	T	G	1328	-6.501	7.994e-11
21	20475873	20711563	20519070	A	G	41568	-5.889	3.883e-09
21	20771120	21240978	21221663	A	C	47011	-5.895	3.748e-09
21	53953801	53953801	53953801	T	TGGGGAAATGACTTAGAAAC	11547	-5.558	2.726e-08
21	56110821	56110821	56110821	A	C	24673	-5.551	2.846e-08
21	59816297	59816297	59816297	A	G	76304	5.479	4.275e-08
21	61448479	61469768	61468067	T	C	64487	-5.689	1.28e-08
21	66698144	66698144	66698144	T	C	79244	5.496	3.885e-08
23	37256997	37256997	37256997	A	G	3611	-5.68	1.349e-08
23	45296505	45613314	45310379	C	G	98741	6.843	7.737e-12
24	30383822	30797050	30489264	T	C	98741	-6.166	7.018e-10
24	35290050	35297151	35297151	A	T	98741	-5.56	2.702e-08
26	43380400	43457657	43451921	A	C	97062	-6.352	2.131e-10
27	27136472	27136472	27136472	T	C	1328	5.508	3.619e-08
29	2487197	2739799	2613003	T	G	19308	-5.621	1.901e-08
29	5937778	5937778	5937778	A	G	13865	5.535	3.113e-08
29	45462706	45769814	45769814	T	C	46440	-5.626	1.842e-08
29	46210372	46446234	46382597	A	G	80923	-5.921	3.202e-09
29	47080701	47190277	47080915	T	C	98741	-6.215	5.124e-10
29	50290775	50360765	50360762	C	G	37287	5.714	1.101e-08

[truncated: 28 more sheets: SuppTable5g-MetaGWAS-QTL-CalvMa, SuppTable5h-Meta-GWAS-QTL-Conc, SuppTable5i-MetaGWAS-QTL-Int1st, SuppTable5j-MetaGWAS-QTL-CalvIn, SuppTable6-ValMetaGWAS-Variants, SuppTable7a-MagmaMY, SuppTable7b-MagmaFY, SuppTable7c-MagmaPY, SuppTable7d-MagmaFC, SuppTale7e-MagmaPC, SuppTable7f-MagmaHFert, SuppTable7g-MagmaCalvMate, SuppTable7h-MagmaConc, SuppTable7i-MagmaInt1stLast, SuppTable7j-MagmaCalvInt, SuppTable8-GeneOverrep-Analysis, SuppTable11-EnrichQTL-Cons-Anno, SuppTable12-Enrich-QTL-ChIPseq, SuppTable16-MendelianSampling, SuppTable17a-QTL-Chr11.103Mb …]
